# Supplementary material for: Investigating the Association Between Azo Dyes and Skin Cancer Using Network Toxicology, Machine Learning, and Molecular Docking
Source: Research Square preprint supplement (doi:10.21203/rs.3.rs-6603799/v1), 2025-06-16
Supplement: Supplementary file 1 [file 4fdc9d1e91483b2cf17571ac.xlsx]

## Sheet: gene card前25%
Gene Symbol	Relevance score
BRCA2	333.16
BRCA1	318.44
ATM	269.47
PALB2	225.61
TP53	214.45
BRIP1	205.49
MSH6	205.11
CHEK2	204.97
MSH2	199.36
MLH1	194.4
APC	189.59
CDH1	188.31
BARD1	178.41
EGFR	175.64
NF1	173.25
PMS2	164.41
PTEN	163.36
C11orf65	159.53
POLD1	144.11
AXIN2	142.61
CDKN2A	137.84
POLE	135.79
BRAF	134.42
TSC2	133.17
MET	130.83
RAD50	127.55
PTCH1	124.47
STK11	123.24
RET	123.1
KRAS	122.56
ALK	122.46
NBN	120
KIT	119.63
RB1	119.12
DICER1	119.05
PIK3CA	117.97
BLM	117.65
SMAD4	117.03
MUTYH	117
BAP1	115.6
SMARCA4	114.28
LOC126862571	114
RAD51D	111.07
RAD51C	109.23
ERBB2	107.05
MSH3	105.8
CDK4	103.98
TSC1	103.23
HRAS	102.56
AKT1	102.38
PDGFRA	102.28
FLCN	102.02
CTNNB1	99.92
FH	97.14
MRE11	95.97
EPCAM	95.96
BMPR1A	95.42
FGFR3	95.25
MEN1	94.9
SDHA	94.65
FBN1	94.49
RAD51L3-RFFL	92.34
FGFR2	91.54
FANCC	91.16
NRAS	90.47
CDKN1B	89.63
TERT	89.38
TYR	88.23
SDHB	87.43
VHL	86.21
CTNNA1	85.19
AR	84.72
LZTR1	83.95
ESR1	83.35
CCND1	83.33
ATR	81.8
DSP	81.57
ERCC2	80.51
H19	79.9
RUNX1	79.56
HOXB13	79.02
MYC	78.27
NF2	77.43
TGFBR2	77.22
MIR21	76.96
COL7A1	74.97
SDHD	74.44
NTHL1	73.5
SDHC	73.27
MLH3	72.71
STAT3	71.64
POT1	71.53
PRKAR1A	71.39
SUFU	70.55
SMARCB1	70.01
MC1R	69.98
PDGFRB	69.59
RECQL4	67.46
CDC73	67.43
XRCC2	67
MDM2	66.9
FGFR1	65.61
MITF	65.3
HOTAIR	65.21
RAD51	64.24
MAP2K1	63.77
MALAT1	63.75
PVT1	63.41
IL6	63.38
GAS5	63.26
NOTCH1	63.12
UCA1	63.02
SRC	62.92
ERCC5	62.71
TGFB1	61.73
ADAM17	61.53
IL1B	61.42
TMEM127	61.2
TP63	61.11
FANCM	61.06
TNF	61.01
ARID1A	60.64
GREM1	60.4
CASP8	60.33
AOPEP	60.23
OCA2	60.07
RAG1	60.01
ERCC4	59.9
PIK3R1	59.84
CDKN2B-AS1	59.38
FANCA	58.4
FANCD2	58.27
LMNA	58.18
PPARG	57.81
XPC	57.79
MIR125A	57.55
KRT14	57.52
HIF1A	57.46
WRN	57.32
SDHAF2	57.24
IFNG	57.21
NTRK1	57.21
MIR221	57.17
BUB1B	57
MIR34A	56.96
CHEK1	56.94
AIP	56.68
BCL2	56.66
RAF1	56.25
XPA	55.75
EP300	55.74
WT1	55.71
MTOR	55.71
CDKN1A	55.67
MIR155	55.42
ERCC3	55.38
SMO	55.38
MIR17	55.34
ERBB4	55.15
MIR145	55.13
PMS1	55.05
PKP1	55.03
FAS	54.57
ERBB3	54.55
VEGFA	54.37
DLC1	54.33
MIR31	54.23
MIR146A	54
PCAT1	53.91
KDR	53.57
CTLA4	53.51
CDKN2B	53.42
PHOX2B	53.22
EZH2	53.16
TUG1	53.11
PTPN11	53.02
MIR203A	52.97
MAX	52.94
SMAD3	52.79
MIR210	52.54
NEAT1	52.46
CCAT1	52.41
MIR143	52.39
MEG3	52.25
MIR205	52.1
FASLG	52
TGM5	51.93
JUN	51.88
MIR146B	51.83
MAPK1	51.81
MIR30A	51.8
CCAT2	51.75
IL10	51.74
DHFR	50.98
MIR223	50.97
RAG2	50.9
GNAS	50.8
MIR214	50.71
BAX	50.6
KITLG	50.59
COL1A1	50.24
MIR141	50.11
IDH1	49.87
IL2	49.84
CD274	49.83
TGFBR1	49.81
MIR222	49.59
KRT5	49.58
SOX2	49.52
MIR126	49.44
MIR20A	49.15
XRCC3	48.52
CXCL8	48.46
FLG	48.46
MUC16	48.43
FBXW7	48.25
IL1RN	48.17
MMP2	48.14
NFE2L2	47.96
ITGB4	47.96
CCNE1	47.94
MIR27A	47.93
CXCR4	47.89
EGF	47.86
MIR200C	47.83
MMP1	47.64
SMARCE1	47.58
ITGB1	47.57
GATA2	47.38
SMAD2	47.28
RARB	47.23
RNF43	47.18
SLC45A2	47.16
DDB2	47.11
ABCA12	47.07
MIR29A	47.03
MIRLET7C	46.86
MIR34C	46.71
PIK3CG	46.61
GATA3	46.49
RAD51B	46.48
MIR200B	46.38
SPOP	46.13
COL17A1	45.85
HULC	45.49
KMT2D	45.4
KRT1	45.35
NFKB1	45.34
FANCG	45.33
TH2LCRR	45.25
MIR182	45.04
PPM1D	44.98
CASC2	44.94
RNASEL	44.94
IDH2	44.89
RAD54L	44.74
CDK12	44.74
GLI1	44.61
FANCL	44.52
GALNT12	44.5
MIR195	44.45
PTGS2	44.37
ERCC1	44.37
ERCC6	44.28
IGF2	44.2
MIR106A	44.04
IGF1R	44.01
FANCE	43.98
MGMT	43.95
MUC1	43.88
MIR200A	43.86
PDCD1	43.81
MMP9	43.79
NFKBIA	43.79
MIRLET7B	43.78
ELN	43.77
NRG1	43.73
ENG	43.61
NTRK3	43.57
FLT4	43.52
IGF1	43.46
COL3A1	43.46
AURKA	43.46
MIR148A	43.44
RECQL	43.38
MIR127	43.3
TYRP1	43.29
GJA1	43.21
KRT10	43.18
CREBBP	43.07
LAMC2	43.01
EGFR-AS1	42.9
SHH	42.87
KRT19	42.86
MIR100	42.81
NTRK2	42.74
MIR140	42.63
MIRLET7D	42.53
FANCI	42.46
MIR22	42.46
MIR149	42.44
MIR29C	42.36
JAK2	42.34
MIR335	42.32
MIR183	42.28
YAP1	42.24
MIR18A	42.18
MIR181A1	42.08
MIR224	42.02
MIR199A1	42.01
SPRY4-IT1	41.98
STAT1	41.91
GSTM1	41.79
HLA-DRB1	41.65
MIR139	41.61
CDSN	41.6
SMAD7	41.49
GNAQ	41.46
MIR150	41.44
MIR30E	41.42
TERC	41.42
CAST	41.4
XIST	41.26
MIR10B	41.23
TGM1	41.2
ABCC1	41.17
PRKN	40.97
MIR191	40.94
CDK2	40.91
RHBDF2	40.9
MIR99A	40.9
GNA11	40.78
LAMB3	40.77
ROS1	40.7
CDK6	40.7
CD44	40.61
ATRX	40.58
HNF1A	40.57
VDR	40.55
PRKDC	40.5
GPC3	40.5
NKX2-1	40.45
MAP2K2	40.45
MIR142	40.44
CASP3	40.36
FANCF	40.33
MIR133B	40.27
LOC100507346	40.22
IRF1	40.19
MIR23A	40.16
AKT3	40.15
SOX9	40.15
PALLD	40.06
ELAC2	40.01
LRRC56	40.01
CSTA	39.99
TGFB2	39.97
MIR204	39.96
KLF6	39.94
KRT17	39.92
MIR19A	39.84
DRAIC	39.74
ABCB1	39.71
CBL	39.61
MIR106B	39.61
HNF1B	39.56
MIR199B	39.34
MIR23B	39.32
VEGFC	39.31
TUBB	39.29
MIR93	39.24
MT-CYB	39.23
MIR122	39.16
TYMS	39.14
DNMT3A	39.13
DNMT1	39.09
PLEC	39.06
COL1A2	39.04
FLT1	38.98
LINC-ROR	38.96
MTHFR	38.76
CDKN1C	38.75
HLA-B	38.73
MIR211	38.65
CCDST	38.64
FOXO1	38.57
CEBPA	38.56
MIR15A	38.55
FERMT1	38.48
TLR4	38.45
CASC15	38.45
KRT7	38.41
GJB2	38.32
XRCC1	38.3
PCAT29	38.28
CYP17A1	38.25
FGFR4	38.18
ABRAXAS1	38.12
MSR1	38.12
GSTP1	38.07
FLG2	38.02
HGF	37.98
MKI67	37.97
CDH3	37.89
SLX4	37.89
MIR10A	37.88
BIVM-ERCC5	37.86
SOD2	37.8
MIR25	37.72
ITGA6	37.72
SOS1	37.71
CFTR	37.69
FGF2	37.67
IL4	37.64
HNF1A-AS1	37.57
AKT2	37.56
ATP6V0A2	37.54
BIRC5	37.52
MIR320A	37.5
KCNQ1OT1	37.48
CYLD	37.39
CBS	37.33
SNHG1	37.3
ICAM1	37.28
MAP3K1	37.28
MIR193A	37.15
HFE	37.14
BANCR	37.11
MIR215	37.08
ABL1	37.08
HOTTIP	37.02
MIR96	37.01
DSG1	37
SNHG16	36.93
ZFAS1	36.75
IL1A	36.7
PCNA	36.65
KRT20	36.64
RASSF1	36.64
MIRLET7G	36.52
CAV1	36.5
BMP4	36.48
NPM1	36.43
TLR2	36.38
KLLN	36.33
PCA3	36.29
PDGFB	36.23
LOX	36.21
ZMPSTE24	36.16
MIRLET7E	36.09
LOC129390903	36.09
DCC	36.08
MIR27B	35.87
MIR497	35.84
JUP	35.74
CASC8	35.67
MIR373	35.66
CYP19A1	35.52
CASP10	35.5
SHC1	35.5
PRF1	35.48
MIR296	35.45
WWOX	35.45
PARP1	35.39
ODC1	35.37
FN1	35.36
MIR152	35.34
FBLN5	35.33
JAK1	35.28
ADAR	35.27
BCYRN1	35.26
PGR	35.25
WRAP53	35.24
ASPRV1	35.24
CD28	35.22
ZEB1	35.13
EPHB2	35.07
SOX2-OT	35
LRP1B	34.98
KEAP1	34.82
CYP1A1	34.81
MIR451A	34.77
BMP6	34.76
FOXP3	34.74
MIR9-1	34.69
NOTCH3	34.68
MIAT	34.66
IL17A	34.64
AXIN1	34.59
SETD2	34.58
HMMR	34.57
MIR34B	34.56
MIR424	34.53
MIR125B1	34.51
PIK3CD	34.51
CCN2	34.43
IRF4	34.36
PYCR1	34.35
IL7R	34.22
ELANE	34.19
ZEB2	34.16
EXT2	34.08
BCAR4	34.05
AXL	34.05
TCF7L2	34.05
BUB1	33.99
HLA-A	33.9
ETV6	33.89
KDM6A	33.85
EPHB4	33.85
MIR324	33.84
JAK3	33.83
FGF10	33.8
MIR98	33.79
IGFBP3	33.79
MIR181B1	33.72
RHOA	33.71
COL5A1	33.7
MIR338	33.68
CCL2	33.67
AFAP1-AS1	33.64
DKC1	33.63
EXT1	33.61
SPP1	33.56
MIR24-1	33.5
LUCAT1	33.47
TWIST2	33.42
NSD1	33.36
CTSB	33.29
MIR185	33.27
TWIST1	33.22
MIR26B	33.2
MIR494	33.2
PRNCR1	33.18
PLAU	33.17
LOC130001603	33.11
MIR30B	33.07
ABCG2	33.02
CYTOR	33
DLEC1	32.98
MIR16-1	32.89
DDR2	32.87
XIAP	32.87
KLK3	32.85
FOXA1	32.84
MIR130A	32.72
KRT2	32.7
MIR342	32.68
LOC111589215	32.65
MAPRE2	32.63
POLK	32.6
HSP90AA1	32.57
ACTA2	32.55
MIR216A	32.55
IL2RA	32.5
BCL10	32.49
TNFRSF1A	32.42
GSTT1	32.36
MIR29B2	32.35
ST14	32.25
ESR2	32.22
SLC19A1	32.21
ACTB	32.18
MIR7-3HG	32.18
RARA	32.13
POMC	32.13
FOS	32.13
SLC2A1	32.1
MIR331	32.08
HCCS	32.03
MAPK3	32.02
CEACAM5	31.96
CRNDE	31.88
KMT2A	31.86
MXI1	31.83
SNAI2	31.8
GSK3B	31.77
SEPTIN9	31.77
CTAG1B	31.77
MIR181A2	31.74
MMP14	31.72
KLF4	31.72
MME	31.61
FHIT	31.6
MAPK10	31.59
PTCH2	31.57
INS	31.56
LOC107303340	31.56
LDLR	31.52
TMPRSS2	31.52
SRA1	31.51
INSR	31.48
MIR192	31.45
SOX10	31.41
CD36	31.36
LORICRIN	31.35
CD4	31.33
FLNA	31.31
MCL1	31.31
MIR101-1	31.3
ABCA1	31.28
MIR32	31.22
ALB	31.2
PRKCA	31.18
PCAT6	31.16
MIR193B	31.14
NOTCH2	31.14
DPYD	31.14
MIR26A1	31.12
DANCR	31.11
TNFRSF8	31.1
ETS1	31.06
TGFB3	31.05
E2F1	31.03
CD82	31.02
POLH	31.02
LIG4	31.01
IL33	30.99
TRPS1	30.95
MIR132	30.91
HLA-DQB1	30.9
CSF2	30.86
MIR107	30.83
MAP2K4	30.79
CSF3	30.78
MIR15B	30.78
WEE1	30.77
NCOR1	30.77
BCL2L1	30.74
CXCL12	30.71
MIR128-2	30.71
PNPLA1	30.66
MIRLET7A1	30.59
RELA	30.57
CD40LG	30.57
IL7	30.56
CCND2	30.55
AHR	30.55
SP1	30.53
MAPK14	30.52
DCTN5	30.52
MIR345	30.52
TSHR	30.5
TOE1	30.46
TGFA	30.44
MIR429	30.44
NME1	30.43
VIM	30.43
TNFRSF10B	30.35
STAT5B	30.34
HAGLR	30.34
MAPK8	30.34
CLPTM1L	30.33
MIRLET7I	30.31
MIR151A	30.28
MYCN	30.28
IAH1	30.27
HMGA2	30.26
SRD5A2	30.26
TP53BP1	30.25
MIR148B	30.24
MIR31HG	30.22
MIR375	30.21
MIRLET7F1	30.18
DSC3	30.16
SOCS1	30.15
CASR	30.14
HERC2	30.13
RPS20	30.09
TNFSF10	30.06
MYD88	30.01
ABCC4	29.93
TEK	29.92
DNMT3B	29.87
MIR197	29.86
HSPB1	29.86
LEP	29.83
PBRM1	29.82
ERG	29.8
SNHG12	29.76
SHOC2	29.75
HOXA11-AS	29.74
IFNA1	29.72
IL13	29.71
MIR328	29.68
LOC130062899	29.66
TINF2	29.61
OGG1	29.61
CRP	29.58
IL18	29.56
SNHG7	29.56
NOS2	29.54
RTEL1	29.53
PTK2	29.48
MIR381	29.46
TP73	29.45
KMT2C	29.4
TP53COR1	29.37
SASH1	29.3
PTENP1	29.3
ATRIP	29.29
B2M	29.27
LAMA5	29.27
CD8A	29.25
FOXM1	29.24
TNFRSF1B	29.24
MIR483	29.19
SCHLAP1	29.16
SPINK5	29.16
MIR212	29.03
CBR3-AS1	29.02
CDK1	28.99
BMP2	28.99
CERNA3	28.97
TIMP1	28.95
MIR361	28.94
RECK	28.93
NAT2	28.86
PHB1	28.85
CD40	28.83
EXOC2	28.83
MIR24-2	28.82
KLC1	28.81
NQO1	28.77
LAMA3	28.76
PTPN3	28.75
BCOR	28.71
CASP9	28.7
BCAR1	28.67
MYH11	28.66
RRAS2	28.66
MIR202	28.62
RNY3	28.58
HDAC1	28.58
BIRC3	28.54
KRT16	28.52
TFRC	28.51
MIR99B	28.51
CDKN3	28.48
NOD2	28.47
CASC11	28.47
RINT1	28.47
NAA10	28.46
FGF7	28.41
TOP1	28.4
MMP7	28.4
LINC00673	28.39
IKBKG	28.38
CLDN1	28.38
FOXO3	28.37
RBBP8	28.33
BTK	28.3
LOC126806658	28.27
CCL5	28.27
CHUK	28.26
WNT5A	28.16
FLT3	28.15
ZFHX3	28.15
POU5F1	28.13
DST	28.12
SNHG5	28.1
SERPINE1	28.07
MIR181C	28.05
TET2	28.04
TOP2A	28.02
AREG	28
ATP7A	27.98
TINCR	27.98
MIR423	27.96
CCR6	27.95
ALOXE3	27.93
TCF3	27.92
STAT6	27.88
PTPRC	27.84
CHD1	27.84
TNFAIP3	27.84
RAC1	27.84
MIR4733HG	27.83
LOC107303338	27.83
GLI2	27.77
MED12	27.76
MIR374A	27.74
TRRAP	27.74
KIF1B	27.73
THBS1	27.71
GGCX	27.7
SERPINB8	27.69
EDN1	27.69
MIR485	27.67
ZNF276	27.66
NR3C1	27.66
CSF1	27.66
CREB1	27.66
MMP3	27.63
PIK3CB	27.55
ARAF	27.5
PORCN	27.5
CHD7	27.49
MIR503	27.4
EWSR1	27.39
MCC	27.39
GJB6	27.38
CSF1R	27.36
TYMP	27.33
MIR339	27.33
STS	27.33
ABCC6	27.32
MIR135B	27.31
NCSTN	27.29
PPP2R2A	27.28
HLA-C	27.26
GATA1	27.24
ASIP	27.23
RMRP	27.19
PANDAR	27.18
ITGA3	27.18
RASA1	27.17
MAD1L1	27.17
CERS3	27.16
CALR	27.15
MUC6	27.14
PIK3R2	27.14
CASC19	27.11
MIR124-1	27.11
RB1CC1	27.09
CD34	27.07
EFEMP2	27.07
WNT10A	27.04
CTSD	27.01
TYK2	27.01
FANCB	27
SNAI1	27
SLC67A1	26.99
ALOX12B	26.99
ADA	26.97
EXO1	26.96
PCAT2	26.96
KRT9	26.94
MSMB	26.93
LINC02605	26.92
SYK	26.92
SPARC	26.91
PAX5	26.91
MUC2	26.86
RIPK1	26.85
PRSS1	26.84
MIR370	26.84
DROSHA	26.84
PPP2R1B	26.83
PLOD1	26.82
CASC9	26.81
TGFBR3	26.78
PKM	26.75
CYP2A6	26.75
HOXA-AS2	26.75
GEN1	26.74
ALDH2	26.73
DLL1	26.72
PPP2R1A	26.71
LOC111811965	26.7
KDM4B	26.69
PPARA	26.68
TSG101	26.67
PTHLH	26.66
CYCS	26.66
CAT	26.66
RHOBTB2	26.66
NORAD	26.64
ATP7B	26.63
SOD1	26.63
IGF2R	26.62
MYLK	26.59
KRT18	26.58
PPARD	26.56
TFAP2A	26.53
MPO	26.53
MIRLET7A3	26.52
STAT5A	26.51
MIR498	26.49
GSN	26.49
HDAC4	26.48
KRT8	26.46
CCND3	26.43
LINC00511	26.41
RNY1	26.38
APEX1	26.37
LGALS3	26.36
PAK4	26.35
ENO2	26.31
MIR128-1	26.28
MIR33A	26.25
COL5A2	26.22
SPRED1	26.19
CYP1B1	26.16
PLCG1	26.15
JAG1	26.15
LEF1	26.13
PRKACA	26.09
MIR92A1	26.08
EPAS1	26.03
PSORS1C1	26
HSPA4	25.99
IL3	25.98
GLI3	25.97
HMOX1	25.96
HMGB1	25.95
ATP2A2	25.95
PCAT7	25.94
TIMP2	25.94
USP48	25.92
IVL	25.91
RAD21	25.89
TRIM24	25.83
SF3B1	25.83
AGO2	25.83
MIR495	25.82
MXRA5	25.81
GAPDH	25.8
CTCF	25.76
FOXE1	25.76
MT-CO1	25.71
TSPAN31	25.69
DIS3L2	25.68
MIR206	25.68
MIR532	25.63
IL5	25.62
IKZF1	25.59
ACTC1	25.55
MIR28	25.55
COMT	25.55
MIR22HG	25.54
ITGB3	25.53
MIR144	25.53
FENDRR	25.53
RIOX2	25.52
GACAT3	25.51
MED1	25.48
IFNA2	25.47
CDH2	25.44
RASA2	25.41
SKIL	25.39
SBDS	25.39
CDKN2C	25.38
LOC129933707	25.38
BDNF-AS	25.35
HLA-DQA1	25.34
CD79A	25.33
G6PD	25.31
ADIPOQ	25.31
MIR378A	25.31
MIR95	25.31
BTNL2	25.29
KDM3A	25.29
MBD4	25.28
REST	25.26
MIR184	25.21
SERPINB4	25.2
NNT-AS1	25.2
GJB3	25.18
MIR377	25.17
DLEU1	25.12
BCL6	25.11
DSG2	25.1
FGF3	25.08
MIR302C	25.08
PRKCD	25.06
BDNF	25.05
SOX18	25.05
NCOA3	25.03
ECM1	25.03
MIR137	25.03
PSMB8	25
EPHA2	25
UGT1A1	24.99
BMI1	24.99
CCDC26	24.98
BCR	24.98
SKP2	24.97
PLK1	24.97
IKBKB	24.96
CTSC	24.94
ING1	24.92
PROM1	24.91
LINC00472	24.91
KPRP	24.87
ACVR1B	24.86
RSPO1	24.84
KL	24.84
PAX8	24.82
ITCH	24.82
ARID1B	24.82
NFKB2	24.81
RABL3	24.8
KLK7	24.8
TUBB3	24.79
ABCC2	24.78
MTR	24.77
ZNF469	24.77
IL15	24.76
NGF	24.76
CTAG2	24.76
MMP13	24.74
GACAT2	24.73
PTPN6	24.73
TG	24.72
MIR196B	24.72
SPINK1	24.71
IL6R	24.7
SPEN	24.7
MIR130B	24.69
TRB	24.68
E2F4	24.68
APOE	24.68
TNXB	24.67
ERCC8	24.63
RRAS	24.6
NLRP3	24.58
SLC24A5	24.57
NDUFB11	24.54
NPTN-IT1	24.49
LTBP4	24.48
SOS2	24.48
CKS1B	24.47
NEK9	24.46
SCUBE3	24.43
KDM1A	24.39
LOC126860438	24.39
SIRT1	24.39
MIR486-1	24.37
PTK2B	24.37
TCF7	24.37
PCSEAT	24.36
SUZ12	24.36
SMARCA2	24.34
TIMP3	24.33
CCR7	24.32
LNCRNA-ATB	24.31
TCF4	24.29
TBX3	24.29
FADD	24.27
CALCA	24.27
IRAK4	24.26
IDO1	24.26
RUNX1-AS1	24.26
FBXO11	24.25
IL2RB	24.25
MIR491	24.24
LIG1	24.23
MIR425	24.22
MYB	24.22
HAVCR2	24.21
SST	24.19
MIR92A2	24.18
REV3L	24.18
SERPINA1	24.17
BSCL2	24.15
MAP3K8	24.13
STAG2	24.12
MIR499A	24.12
CCNB1	24.11
MIR190A	24.08
MACF1	24.08
CDC42	24.07
SNHG15	24.04
GRB2	24.04
MECOM	24.04
CXCR3	24.03
SOCS3	24.02
PKHD1	24.02
LOC130002133	24.01
DDR1	23.99
SOD2-OT1	23.98
MIR675	23.93
NRP1	23.89
HDAC9	23.89
PARD3	23.89
MIR136	23.89
CCL27	23.88
NEK2	23.87
CHST14	23.87
CXCL10	23.85
MIR196A2	23.85
MIR542	23.84
ANGPT2	23.84
HBEGF	23.84
PLAUR	23.82
MIR301A	23.81
VCAM1	23.81
STAT4	23.81
RUNX3	23.81
BLTP2	23.8
FUS	23.79
RYR1	23.75
DDX41	23.74
LDHA	23.73
TFF1	23.73
PLCG2	23.72
POSTN	23.71
FBN2	23.69
THBS2	23.68
SYP	23.67
DGCR5	23.66
CD80	23.66
IRS1	23.65
ASXL1	23.63
ITGAM	23.63
PDCD1LG2	23.61
TMC8	23.61
DOCK8	23.61
GZMB	23.6
YTHDC2	23.58
PML	23.58
COX7B	23.56
CCNA2	23.54
DKK1	23.53
HABP2	23.51
TNFSF11	23.5
CXCL1	23.5
PTPRD	23.47
EGR1	23.46
HSPA5	23.45
PI3	23.45
U2AF1	23.45
PDPN	23.44
CTC1	23.41
THADA	23.4
NCAM1	23.39
IL1R1	23.39
CDC25A	23.38
CFLAR	23.38
MAML1	23.37
PTPRJ	23.36
RPS6KB1	23.35
PRL	23.35
MDM4	23.34
FALEC	23.34
ERAP1	23.32
ACD	23.3
BLACAT1	23.3
ZEB1-AS1	23.29
GLA	23.28
ANXA5	23.27
RIT1	23.26
DMD	23.22
CXCR2	23.2
CDC25C	23.2
ADAMTS3	23.2
PREX2	23.19
CYP2D6	23.17
GTF2H5	23.16
DCN	23.14
MIR181D	23.14
LCK	23.12
EDAR	23.11
ETV4	23.1
AURKB	23.09
GRHL2	23.09
RXRA	23.07
PLA2G2A	23.07
SOX5	23.06
SYNE1	23.06
PCAT14	23.06
LYN	23.06
BAK1	23.05
ABCB6	23.05
ALDH18A1	23.03
PCAT18	23.03
CIB1	23.02
KLHL24	23.01
GLS	23
VTN	23
PECAM1	23
AMER1	22.99
ITGB2	22.99
FASN	22.98
KRT15	22.98
CTSE	22.93
GHET1	22.93
HSPD1	22.91
SNHG6	22.91
SQSTM1	22.9
EHBP1	22.9
POLR1HASP	22.9
FGF4	22.88
MECP2	22.87
MIR186	22.86
NSUN2	22.85
MPL	22.85
LRP1	22.83
BGN	22.83
TLR7	22.83
LOC126806659	22.82
CD46	22.81
PCAT5	22.8
VCAN	22.79
RAD54B	22.78
ITGA2	22.76
SELE	22.76
MAGI2	22.75
POU5F1B	22.75
SGK1	22.74
CHGA	22.73
KRT6A	22.72
THBS4	22.71
CDX2	22.69
AIFM1	22.68
CD70	22.68
CCR5	22.68
WT1-AS	22.67
GBA1	22.66
PAH	22.65
BRD4	22.62
EFEMP1	22.62
NCOR2	22.62
HOTAIRM1	22.59
ZNF224	22.59
MIR134	22.59
MIR125B2	22.56
CYP3A4	22.55
MEFV	22.55
APOB	22.55
DPP4	22.51
CYP2E1	22.51
INHBA	22.5
F3	22.5
NOS3	22.45
IL12RB1	22.45
MFN2	22.44
B4GALT7	22.42
NKX3-1	22.41
MIR219A1	22.39
TLR9	22.37
HPGD	22.36
KCNN3	22.34
CLU	22.34
PAX3	22.33
EDNRB	22.33
MT-TT	22.33
EDNRA	22.32
FGF1	22.31
ELAVL1	22.29
NECTIN4	22.29
MIF	22.27
TMC6	22.27
CUBN	22.26
CD55	22.26
BCL2L11	22.26
PLG	22.25
NQO2	22.25
MIR376A1	22.24
ADA2	22.23
EGOT	22.23
UHRF1	22.22
MIR138-1	22.22
SNHG20	22.22
SCARNA5	22.21
ENO1	22.21
ANGPT1	22.19
XRCC6	22.19
RAB27A	22.19
BANF1	22.18
IRS2	22.17
ATG13	22.16
COL2A1	22.13
ZKSCAN1	22.13
HLA-G	22.13
MIR452	22.12
SMC3	22.11
NBAT1	22.11
CEP57	22.1
MVK	22.1
LOC110806263	22.1
CD19	22.09
S100A7	22.09
EZR	22.08
MIR508	22.06
DSE	22.06
NLRP1	22.05
AMACR	22.05
LGALS1	22.03
S100A8	22.03
OXA1L	22.02
XRCC4	22
MIR511	21.99
ITGAV	21.98
DUXAP9	21.97
JAZF1	21.94
MIR502	21.93
LOC106721785	21.92
VEGFD	21.92
MTAP	21.92
IL6ST	21.91
IGF2-AS	21.9
FANCD2OS	21.87
ACE	21.84
SULT2B1	21.84
EIF2AK3	21.83
CARD14	21.82
NIPAL4	21.8
MIR663A	21.8
LINC01234	21.79
HIF1A-AS2	21.78
GUSB	21.76
CBFB	21.76
XRCC5	21.75
PAK1	21.74
MAP3K6	21.72
FOXP1	21.71
LTA	21.7
IGFBP2	21.7
MIR29B1	21.69
COL4A1	21.69
ABCC3	21.68
ITGA5	21.68
CAGE1	21.68
CERNA2	21.68
CD27	21.67
RBP4	21.67
EPHA3	21.67
BECN1	21.67
ROBO1	21.65
DSG4	21.65
KRT83	21.64
SLC2A10	21.63
GADD45A	21.63
LZTS1	21.63
HNRNPK	21.62
MUC4	21.62
MALT1	21.6
MIR198	21.6
BMP7	21.58
YY1	21.56
MIR124-3	21.56
CASC22	21.55
GDF15	21.53
UIMC1	21.52
PPP1CB	21.5
NOP10	21.5
FOLH1	21.48
ANXA2	21.47
F2RL1	21.46
GSTM3	21.46
PHGDH	21.45
CD86	21.45
FPR1	21.44
MMP11	21.42
USP28	21.42
PTPN12	21.42
MPLKIP	21.41
CD151	21.39
S100A9	21.37
MNX1-AS1	21.37
PIM1	21.37
CCN1	21.34
ZNF462	21.33
PYHIN1	21.33
ING4	21.33
DELEC1	21.29
PPOX	21.26
RUNX2	21.26
MIR30C1	21.25
ADAMTS2	21.25
NDRG1	21.23
CTNND1	21.22
MAF	21.22
GLB1	21.22
TFE3	21.22
KLK5	21.17
TAP1	21.16
EDA	21.16
PPP2R5C	21.16
CCL20	21.14
NR1H2	21.13
S100A4	21.11
TFDP1	21.1
CYP24A1	21.08
XBP1	21.07
HOXC13	21.06
SRGAP1	21.06
HSPA9	21.05
GJB4	21.04
CD59	21.04
SRSF2	21.03
CUL1	21.02
PCSK9	21.02
KAT7	21.01
ICOS	21.01
TNFSF4	20.99
MIR100HG	20.96
FAP	20.95
GRWD1	20.94
KIR3DL1	20.94
SOX4	20.93
HPRT1	20.93
GPC6	20.92
SEZ6L	20.91
POLN	20.9
LOC130004614	20.9
IFIH1	20.88
DCT	20.88
AFP	20.88
TNFRSF10A	20.83
EPOR	20.83
CSF3R	20.83
RLIM	20.8
COL11A1	20.8
ITIH5	20.8
OFD1	20.8
MIR4435-2HG	20.8
CYP1A2	20.78
DDX3X	20.77
GRP	20.77
RPS19	20.77
MIR154	20.76
SKI	20.75
CAND1	20.74
ID1	20.74
WNT10B	20.73
HIC1	20.71
ALDH1A3	20.7
LINC00261	20.7
SETBP1	20.69
CEACAM3	20.68
ALDH1A1	20.68
DAPK1	20.67
BAD	20.67
SF3B3	20.67
LINC01133	20.66
NKILA	20.65
NGFR	20.64
CBY1	20.62
PDGFRL	20.61
PDK1	20.61
MUC5AC	20.61
LOC130004273	20.6
RPL5	20.6
MSN	20.58
MIR432	20.57
CTSK	20.56
TRAF5	20.56
THBS3	20.54
CP	20.53
IRF5	20.53
HSPG2	20.53
AKAP9	20.51
MIR30D	20.49
WNT1	20.48
GLUL	20.48
APOA1	20.47
STK4	20.47
RMST	20.46
FKBP14	20.45
TRAF6	20.45
PRDM5	20.44
ATP2B4	20.44
PRKD1	20.44
TRPM3	20.43
PSCA	20.43
FSCN1	20.41
ETV1	20.41
VEGFB	20.4
HIP1	20.4
EPHX1	20.39
HMMR-AS1	20.39
PMEL	20.38
KLRK1	20.38
TUFT1	20.38
CHST8	20.36
MUC17	20.35
ENPP1	20.35
IL36RN	20.35
FCGR3B	20.34
LIF	20.34
DNAH8	20.33
SNORD15A	20.33
RIN2	20.33
TOP2B	20.32
UROD	20.31
COPS6	20.31
MYRF	20.31
PKD1	20.3
CASP14	20.3
CCR1	20.29
ACAT1	20.28
CYSLTR1	20.26
KLF5	20.26
C1S	20.25
HOXA11	20.24
TRAF2	20.23
KRT6B	20.23
C3AR1	20.22
CYP27B1	20.2
PTGS1	20.19
LCAL1	20.19
TNC	20.19
BCL11B	20.18
MIR196A1	20.18
TTR	20.17
BIRC2	20.17
MIR129-1	20.16
KIR2DL3	20.16
ZNF304	20.15
MIR337	20.14
TUSC7	20.14
ATP6V0A1	20.13
SMUG1	20.12
GPI	20.1
SERPINB5	20.09
CASP7	20.08
EIF4E	20.08
TNFRSF19	20.06
COL18A1	20.06
GORAB	20.06
EIF4G3	20.06
IL22	20.06
ACVR1	20.06
TNFRSF11B	20.05
TREX1	20.05
F2	20.04
MIR103A1	20.04
TBX20	20.04
BSG	20.04
MIR515-1	20.04
MIR372	20.03
TPM1	20.03
PIEZO1	20.03
LIFR	20.03
TERF2IP	20.03
LCN2	20.03
IFNB1	20.03
SNHG31	20.02
GNRH1	20.02
GRM8	20.01
DIS3L	20
YWHAE	20
GHR	19.99
EPO	19.99
SEC23B	19.99
OTX2	19.99
CIITA	19.99
SCN11A	19.98
ENPP7	19.97
SULT1A1	19.97
HDAC6	19.97
ADAM10	19.96
PARN	19.95
HLA-DPB1	19.95
KRT86	19.95
MYCL	19.93
MCM4	19.93
DSC2	19.92
PEPD	19.9
EIF4EBP1	19.89
SAMHD1	19.88
CASP1	19.88
EREG	19.87
L1CAM	19.86
USB1	19.86
IFI27	19.84
EED	19.84
MIR487B	19.83
LINC01772	19.82
TRAF3	19.82
IL17F	19.81
TNFRSF11A	19.81
NFATC1	19.8
ARHGEF15	19.8
SNCG	19.78
MIR409	19.78
WDFY3	19.77
GPSM2	19.77
CUX1	19.77
SMC1A	19.77
ADRM1	19.76
THPO	19.75
ANXA1	19.75
CARD11	19.74
SLURP1	19.74
TRIP12	19.73
SLC39A13	19.73
GNE	19.73
SREBF1	19.7
MYO5A	19.7
HAS2	19.7
DLEU2	19.68
H2AX	19.66
TRIM28	19.66
PHB2	19.66
NTN4	19.65
PXN	19.65
EPB41L4A-DT	19.64
RHEB	19.63
ANTXR1	19.63
ACVRL1	19.63
XPO1	19.62
B3GALT6	19.62
NCOA2	19.62
SYNGR1	19.61
DDIT3	19.6
BRINP1	19.59
CR2	19.59
TGM2	19.58
IL4R	19.58
MAGEA3	19.58
RELB	19.58
PEG10	19.57
IL24	19.56
HR	19.56
CSMD2	19.56
ALOX5	19.54
TERF1	19.53
ZNF136	19.51
EDARADD	19.5
LTBP1	19.5
RPS27A	19.49
FLI1	19.49
C4A	19.48
GATA6	19.47
RRM1	19.47
TRPC4	19.46
RASAL2	19.46
MIR330	19.45
GATA4	19.44
VIP	19.44
HTR2C	19.43
CXCL9	19.41
RBPJ	19.41
PPP1R3C	19.41
SH2B3	19.41
FER1L4	19.4
CDC27	19.4
SLC39A7	19.38
ZEB2-AS1	19.38
FGD2	19.38
MIRLET7A2	19.37
MYCBP2	19.36
MIR340	19.36
TPCN2	19.36
HMGCR	19.34
VWF	19.34
XDH	19.34
KREMEN1	19.33
BMPR2	19.3
TSLP	19.28
INTS3	19.28
CABIN1	19.27
CRABP2	19.27
ZAP70	19.24
YBX1	19.22
HOXA13	19.22
ATP4A	19.21
CEBPB	19.21
MST1R	19.21
SRD5A1	19.2
PIGH	19.2
ANO9	19.2
HDAC2	19.19
STUB1	19.19
TBL1XR1	19.18
FABP5	19.18
NHP2	19.18
SCG5	19.18
DEFB4A	19.17
FGF23	19.16
KLHL20	19.16
ALDOA	19.16
CXCR1	19.15
HMBS	19.15
LOC109504725	19.15
NECTIN1	19.15
CYP4F22	19.15
ILK	19.13
SNHG14	19.12
SHBG	19.1
MYH9	19.1
TERF2	19.09
IL12B	19.09
NT5E	19.08
MT-ND1	19.07
ARAP3	19.07
PALM2AKAP2	19.04
MAP3K7	19.04
PSAP	19.03
PTGER4	19.02
GFRA3	19.01
DSP-AS1	19
PRKCB	18.99
SPINT2	18.99
SLC24A4	18.99
MIR590	18.98
FUCA1	18.98
MMP8	18.97
SLC6A9	18.97
KIF16B	18.97
CHAC1	18.97
TNFRSF9	18.95
NRCAM	18.95
ISG15	18.95
AGER	18.95
PCGF2	18.94
PCGEM1	18.93
WAS	18.93
GNA14	18.93
CALML5	18.93
HMGA1	18.92
UGCG	18.92
STX8	18.92
BID	18.92
MAT2A	18.91
CDH13	18.91
FOXC1	18.91
EDN3	18.91
ATP2C1	18.91
CCR2	18.91
FAM83C	18.89
CTBP1	18.89
ALOX12	18.89
ABCE1	18.89
ABCF3	18.89
FRGCA	18.88
TRIP13	18.88
PRKG1	18.88
MRTFA	18.88
IL11	18.87
DLL4	18.86
PGBD3	18.86
FGF9	18.86
MAGEA1	18.86
FOXC2	18.85
MSH5	18.84
RMI1	18.83
FCGR3A	18.83
TGIF1	18.82
COL6A1	18.82
KLK6	18.81
HNF4A	18.79
USP7	18.78
CSNK2A1	18.78
MBL2	18.77
TKT	18.77
MTX2	18.77
GRN	18.77
RPL11	18.75
EBAG9	18.75
F5	18.74
TLR3	18.74
S100A2	18.74
EMSY	18.72
RUNX1T1	18.72
NSD2	18.72
URB2	18.72
EXPH5	18.72
CAMP	18.71
TF	18.71
NAT1	18.71
ARMC12	18.71
ZNF667-AS1	18.7
EML4	18.7
SSBP2	18.7
AKAP1	18.7
CCNH	18.69
RIGI	18.69
LEPR	18.69
CUL3	18.68
UBE2T	18.67
FOXP2	18.67
HSPA8	18.67
PPRC1	18.66
IL16	18.66
MIR500A	18.66
ZNF184	18.64
COL4A5	18.63
SMARCAD1	18.63
NOTCH4	18.63
RECQL5	18.62
PLAT	18.62
BICDL3P	18.62
MTHFD1	18.61
CST6	18.6
ENOX1	18.6
CA9	18.59
ATF3	18.59
STING1	18.59
MCM3	18.59
GFOD3P	18.58
FEZF1-AS1	18.58
GPR55	18.57
SOX11	18.57
PLAG1	18.57
FCGR2A	18.56
AATBC	18.56
TPX2	18.55
IGF2BP3	18.55
KNG1	18.55
TSHZ3	18.55
NES	18.55
KDM5C	18.53
LBR	18.53
E2F3	18.52
PDGFA	18.52
TAP2	18.51
DPH7	18.51
MLPH	18.5
AP3B1	18.5
HSP90AB1	18.5
CUL4B	18.5
ARNT	18.49
GDF10	18.48
LATS1	18.48
TXN	18.47
SLC46A3	18.46
KISS1	18.46
LURAP1L-AS1	18.46
DVL1	18.45
MIRLET7F2	18.45
MAPT	18.45
MIR376C	18.45
SERPINB2	18.44
ITGB6	18.44
KRT74	18.41
CHGB	18.41
IQANK1	18.39
SORBS1	18.38
GAST	18.38
ZMAT3	18.37
IFNGR1	18.37
SFN	18.37
ANKRD26	18.37
ARID2	18.37
RPSA	18.36
CTSL	18.36
SAMD9	18.35
MTA1	18.34
RPA1	18.34
PIP	18.33
CCL22	18.32
CD9	18.32
APAF1	18.32
ARG1	18.32
PTH	18.31
PBOV1	18.31
MBTPS2	18.3
OSM	18.3
CTTN	18.29
MT-CO2	18.29
SNHG17	18.29
CD163	18.29
PBX1	18.28
MAP3K14	18.28
CKAP5	18.27
PAX6	18.26
MIR449A	18.26
DCK	18.26
H3-3A	18.25
DPPA4	18.25
FEN1	18.22
RANBP2	18.22
MIR518B	18.21
GPER1	18.19
CAMTA1	18.19
BTRC	18.18
ERCC6L2	18.18
RAD52	18.17
PPP1R13L	18.17
KIF12	18.17
E2F2	18.17
LCP1	18.16
KDM5B	18.16
ATP6V1E1	18.14
STRA6	18.14
SLC29A3	18.13
LYST	18.13
NOG	18.12
CADM1	18.1
PGK1	18.08
MVP	18.08
C1R	18.07
MIR379	18.07
EIF1AX	18.07
GPX4	18.06
PPP6R2	18.06
CPOX	18.06
RBAK	18.05
SBNO1	18.05
CDH17	18.03
PHF2	18.03
F13A1	18.03
LRP6	18.03
MSX1	18.02
DHX29	18.01
NPC1	18.01
AIRE	18.01
MIR455	18
PLB1	17.99
ADRB2	17.98
SDR9C7	17.98
ROR2	17.98
GDF6	17.98
IGFBP1	17.98
BTBD16	17.98
BPTF	17.97
PEBP1	17.97
COL6A3	17.96
IL17RA	17.96
HSD3B1	17.96
COL12A1	17.95
LRRK2	17.95
SPATA18	17.95
HPSE	17.94
CDKN2AIP	17.94
ZNF776	17.94
S100A6	17.93
NCOA1	17.93
F2R	17.93
ANAPC1	17.91
PRDM1	17.91
CD247	17.9
DIRC3	17.89
THY1	17.88
MIR574	17.88
PTPRK	17.88
BRF2	17.87
SMPD1	17.86
SCRN1	17.86
GFAP	17.85
SDC1	17.85
CLDN7	17.85
MYO18A	17.85
CASZ1	17.84
IGFBP5	17.84
SERPINB3	17.83
ELOVL4	17.82
CCDC171	17.81
MMP10	17.81
CCBE1	17.81
FOSL1	17.8
S100B	17.8
DEK	17.79
KCNH2	17.79
LINC00958	17.78
WNT3	17.78
GDF3	17.78
DOT1L	17.76
DSCAML1	17.76
COL4A2	17.74
PLCB4	17.74
GH1	17.73
MIR627	17.73
HCG11	17.72
IL10RA	17.72
SLC27A4	17.72
MICA	17.72
UBA2	17.71
HSD3B2	17.71
RPS10	17.7
RARS1	17.7
SSTR1	17.7
MIR20B	17.69
MDC1	17.68
PXDN	17.68
ZDHHC8	17.68
AQP5	17.67
CD24	17.66
LNMICC	17.65
RICTOR	17.64
IRF8	17.64
ADAT1	17.64
TNFRSF13B	17.63
RACK1	17.62
WNT3A	17.62
CHD8	17.61
CDH11	17.61
MIR501	17.61
PRKCE	17.59
TBK1	17.58
SRP72	17.58
RREB1	17.57
CD68	17.56
EFNA3	17.56
BRMS1	17.56
MTDH	17.55
PHOX2B-AS1	17.54
PDPK1	17.54
RSPO2	17.52
FGF8	17.5
DCLRE1C	17.49
HBB	17.48
IKBKE	17.47
NELL1	17.46
TMCO5A	17.46
CACNA2D1	17.46
NAPB	17.46
STIM1	17.45
PTPN21	17.44
LRP5	17.44
ALCAM	17.43
CD81	17.42
PIGL	17.41
LAG3	17.41
[truncated: 2,523 more rows]

## Sheet: OMIM前25%
BCC1
CMM
MLM
DNS
SAI1
MTS1
TFS1
ISG15
G1P2
IFI15
IMD38
MIR200B
MIR200A
MIR429
TNFRSF4
TXGP1L
OX40
ACT35
IMD16
B3GALT6
SEMDJL1
EDSSPD2
ALGAZ
MXRA8
ASP3
ATAD3A
HAYOS
PHRINL
TMEM240
C1orf70
SCA21
MIB2
GNB1
MRD42
MDS
SKI
SGS
PRDM16
MEL1
LVNC8
CMD1LL
ARHGEF16
MIR551A
TP73
CILD47
SMIM1
VEL
CHD5
PMNDS
HES2
TNFRSF25
TNFRSF12
DR3
LARD
PHF13
SPOC1
UTS2
TNFRSF9
ILA
CD137
IMD109
DJ1
PARK7
MIG6
RALT
ENO1
PPH
MPB1
MIR34A
MIRN34A
SLC25A33
PIK3CD
APDS
IMD14A
IMD14B
ROCHIS
CTNNBIP1
ICAT
LZIC
KIF1B
CMT2A
CMT2A1
NBLST1
CENPS
APITD1
MHF1
DFFA
DFF1
PEX14
PBD13A
CASZ1
SRG
TARDBP
TDP43
ALS10
MTOR
FRAP1
SKS
ANGPTL7
CDT6
UBIAD1
TERE1
SCCD
MAD2L2
MAD2B
FANCV
MTHFR
CLCN6
PLOD1
LH1
LLH
EDSKCL1
MFN2
KIAA0214
CMT2A2A
HMSN6A
CMT2A2B
MSL
TNFRSF8
CD30
D1S166E
DHRS3
RETSDR1
PRDM2
RIZ
KAZN
CTRC
CLCR
AGMAT
AUH
SPEN
MINT
SHARP
HIAA0929
RATARS
SRARP
ERRF
C1orf64
HSPB7
CVHSP
EPHA2
ECK
CTPP1
CTPA
ARCC2
CTRCT6
SZRD1
C1orf144
RNU1A
RNU1
MFAP2
MAGP
MAGP1
PADI2
PADI3
UHS1
ACTL8
CT57
PAX7
RMS2
CMYO19
ALDH4A1
ALDH4
P5CDH
UBR4
ZUBR1
RBAF600
KIAA1307
D1S1733E
DAN
CDA
PINK1
PARK6
EIF4G3
EIF4GII
ALPL
HOPS
TNSALP
HPPA
HPPO
HPPI
HPPC
z
PLC
SJS
SJA
SJS1
CDC42
TKS
WNT4
SERKAL
C1QC
C1QG
C1QD3
C1QB
C1QD2
EPHB2
EPHT3
DRT
ERK
PCBC
CAPB
BDPLT22
KDM1A
LSD1
AOF2
BHC110
KIAA0601
CPRF
AIMAH3
ASAP3
UPLC1
CENTB6
DDEFL1
ACAP4
E2F2
ID3
MDS2
RPL11
DBA7
GALE
THC13
HMGCL
FUCA1
CNR2
CB2
CX5
IL22RA1
IL22R1
GRHL3
SOM
TFCP2L4
VWS2
CLIC4
MTCLIC
RUNX3
CBFA3
PEBP2A3
AML2
RSRP1
C1orf63
LDLRAP1
ARH
FHCB2
FHCB1
FHCL4
SELENON
SEPN1
SELN
CMYO3
PAQR7
MPRA
PGLP
STMN1
LAP18
SMN
SH3BGRL3
ZNF683
HOBIT
LIN28A
ARID1A
C1orf4
B120
SMARCF1
MRD14
CSS2
SFN
NR0B2
SHP
KDF1
C1orf172
ECTD12
TENT5B
FAM46
SLC9A1
NHE1
APNH
LIKNS
FCN3
HAKA1
EBVS1
THEMIS2
C1orf38
ICB1
ATP1F1
IF1
SEST2
HI95
YTHDF2
SDC3
SYND3
SDCN
PUM1
KIAA0099
SCA47
NEDMSF
FABP3
SERINC2
PTP4A2
PTP4A
PRL2
HH13
LCK
IMD22
HDAC1
RPD3L1
MARCKSL1
MLP
MRP
S100PBP
S100PBPR
TRIM62
DEAR1
MACST
GJB4
CX30.3
EKVP2
GJB3
CX31
DFNA2B
EKVP1
DLGAP3
SPAPA3
TFAP2E
NOR1
CSF3R
GCSFR
SCN7
ZC3H12A
MCPIP
MCPIP1
SNIP1
NEDHCS
RSPO1
FLJ40906
AIRIM
C1orf109
YRDC
IRIP
GAMOS10
RRAGC
RAGC
LNGODS
MACF1
ACF7
KIAA1251
LIS9
PPIE
CYP33
TRIT1
IPT
COXPD35
MYCL
LMYC
PPT1
CLN1
RLF
ZMPSTE24
FACE1
STE24
MADB
RSDM1
MIR30C1
CITED4
GUCA2B
UGN
YBX1
NSEP1
YB1
DBPB
P3H1
LEPRE1
GROS1
OI8
SLC2A1
GLUT1
HTLVR
DYT18
PED
GLUT1DS
EIG12
DYT9
SDCHCN
CFAP57
WDR65
SPGF95
TIE
JTK14
TIE1
LMPHM11
MPL
TPOR
MPLV
THCYT2
CDC20
OZEMA14
ELOVL1
SSC1
IKSHD
PTPRF
LAR
BNAH2
DPH2
DPH2L2
DEDSSH2
SLC6A9
GLYT1
GCENSG
KLF717
ZLF393
RNF220
HLD23
RPS8
PLK3
CNK
PRK
DYNLT4
TCTEX1D4
PTCH2
HECTD3
UROD
MUTYH
MYH
TOE1
PCH7
PRDX1
PRXI
PAGA
NKEFA
RAD54L
HR54
HRAD54
CYP4Z2P
FWS
UQCRH
MC3DN11
MOB3C
CYP4B1
CYP4Z1
PDZK1IP1
MAP17
TAL1
TCL5
SCL
CMPK1
CMPK
UMPK
UMK
CMK
ELAVL4
HUD
PNEM
CDKN2C
INK4C
RNF11
ORC1
ORC1L
GPX7
NPGPX
SCP2
CPT2
IIAE4
CPT2
IIAE4
GLIS1
LRRC42
TTC4
PCSK9
NARC1
HCHOLA3
FH3
LDLCQ1
FHCL3
DAB1
SCA37
TACSTD2
TROP2
M1S1
MYSM1
2ADUB
KIAA1915
BMFS4
JUN
POROK5
DSAP3
ANGPTL3
ANGPT5
FHBL2
ITGB3BP
NRIF3
ROR1
NTRKR1

## Sheet: skin cancer致病基因汇总
交集		汇总（删除重复项）
MUTYH		BRCA2
MTOR		BRCA1
ARID1A		ATM
MIR34A		TP53
JUN		PALB2
MIR200B		MSH6
MIR200A		MSH2
RAD54L		MLH1
MTHFR		CHEK2
ZMPSTE24		APC
EPHB2		BRIP1
PIK3CD		CDH1
SLC2A1		PTEN
PTCH2		EGFR
MIR429		NF1
TNFRSF8		PMS2
TP73		BARD1
TOE1		CDKN2A
HDAC1		AXIN2
KIF1B		C11orf65
PLOD1		BRAF
EPHA2		POLD1
CDKN2C		DICER1
MPL		PIK3CA
RSPO1		POLE
GJB3		TSC2
KDM1A		MET
SPEN		KRAS
CDC42		KIT
MACF1		RAD50
RUNX3		PTCH1
LCK		STK11
ENO1		ALK
CSF3R		RET
MFN2		ERBB2
MIR30C1		NBN
PCSK9		CTNNB1
GJB4		RB1
MYCL		HRAS
UROD		SMAD4
TNFRSF9		MUTYH
SKI		BAP1
ISG15		BLM
YBX1		LOC126862571
B3GALT6		SMARCA4
TNFRSF4		RAD51D
SLC6A9		AKT1
E2F2		RAD51C
EIF4G3		CDK4
RPL11		MSH3
SFN		NRAS
FUCA1		TSC1
STMN1		PDGFRA
CASZ1		FLCN
SLC9A1		FH
ID3		MRE11
MAD2L2		FGFR3
TACSTD2		BMPR1A
CDC20		EPCAM
PRDM16		MEN1
PRDX1		FBN1
MIR551A		FGFR2
WNT4		RAD51L3-RFFL
PARK7		SDHA
PRDM2		MYC
CLCN6		TERT
KDF1		FANCC
PAX7		CDKN1B
ALPL		SDHB
LIN28A		ATR
GNB1		ESR1
CTNNBIP1		VHL
DHRS3		TYR
TARDBP		AR
CTRC		CCND1
CDA		CTNNA1
TAL1		DSP
C1QB		ERCC2
GRHL3		H19
PEX14		LZTR1
PINK1		MAP2K1
YTHDF2		MTOR
TIE1		HOXB13
MYSM1		MIR21
ATAD3A		RUNX1
C1QC		NF2
GPX7		TGFBR2
SCP2		NTHL1
NR0B2		PRKAR1A
CLIC4		SDHD
PUM1		SDHC
		STAT3
		SMARCB1
		POT1
		SUFU
		PDGFRB
		RECQL4
		MC1R
		XRCC2
		MLH3
		GNAS
		PIK3R1
		MDM2
		RAF1
		IDH1
		LRRC56
		FBXW7
		HOTAIR
		FGFR1
		CDC73
		GAS5
		EZH2
		COL7A1
		MALAT1
		ERCC5
		NOTCH1
		IL6
		UCA1
		RAD51
		SRC
		TGFB1
		TMEM127
		TNF
		PVT1
		IL1B
		FANCM
		ERCC4
		CASP8
		AOPEP
		MIR125A
		GREM1
		MIR221
		ADAM17
		ERBB3
		ARID1A
		MITF
		SDHAF2
		RAG1
		EP300
		CDKN2B-AS1
		IDS
		TP63
		SMO
		PPARG
		FANCD2
		LOC126806658
		MIR34A
		MAPK1
		MIR155
		XPC
		CREBBP
		CHEK1
		FANCA
		WRN
		MIR17
		KRT14
		PMS1
		LMNA
		OCA2
		NTRK1
		BCL2
		WT1
		XPA
		AIP
		HIF1A
		CDKN1A
		FAS
		PTPN11
		MIR146A
		IFNG
		MIR145
		ERCC3
		MAX
		ERBB4
		MIR203A
		BUB1B
		PKP1
		PCAT1
		NFE2L2
		CCAT1
		MIR210
		VEGFA
		MIR31
		TUG1
		MIR223
		MIR146B
		MEG3
		CCAT2
		PHOX2B
		MIR30A
		CDKN2B
		MIR205
		MAP2K2
		MIR214
		FASLG
		MIR143
		CTLA4
		NEAT1
		KDR
		MIR222
		JUN
		DHFR
		MIR141
		IL10
		TGM5
		IL2
		CD274
		SMAD3
		MIR20A
		BAX
		MIR126
		RAG2
		KRT5
		MUC16
		KITLG
		TGFBR1
		COL1A1
		SOX2
		MIR200C
		B2M
		CCNE1
		MMP1
		MIR27A
		CXCR4
		MIRLET7C
		CXCL8
		XRCC3
		MMP2
		MIR200B
		RHOA
		EGF
		IL1RN
		ITGB4
		PIK3CG
		GATA2
		DDB2
		MIR29A
		FLG
		MIR34C
		ABCA12
		RNF43
		MIR182
		SMAD2
		RARB
		GATA3
		IDH2
		ITGB1
		EGFR-AS1
		HULC
		CASC2
		SMARCE1
		COL17A1
		MIR200A
		GNA11
		MIR106A
		RAD51B
		MIRLET7B
		MMP9
		RAC1
		RNASEL
		NFKB1
		FANCG
		MIR195
		FLT4
		MIR148A
		PDCD1
		GLI1
		MGMT
		IGF2
		FANCL
		PTGS2
		MUC1
		AURKA
		ERCC1
		MIR335
		KMT2D
		RAD54L
		NRG1
		IGF1
		MIR29C
		MIR140
		FANCE
		MIR18A
		SPOP
		IGF1R
		GALNT12
		MIR149
		ENG
		MIR100
		ELN
		CBS
		MIR127
		MIR181A1
		SF3B1
		MIRLET7D
		MIR183
		RECQL
		SLC45A2
		MIR22
		MIR224
		NFKBIA
		GJA1
		NTRK2
		SPRY4-IT1
		NTRK3
		CDK12
		LAMC2
		MIR199A1
		MIR139
		XIST
		KRT1
		JAK2
		FGFR4
		SHH
		PPM1D
		GSTM1
		MIR142
		HERC2
		YAP1
		TERC
		KRT19
		ROS1
		ERCC6
		MIR204
		MIR150
		CBL
		MIR99A
		MIR191
		MIR199B
		MIR30E
		MIR10B
		ATRX
		STAT1
		MIR133B
		COL3A1
		FANCF
		MIR19A
		PRKDC
		HNF1A
		ABCB1
		TGM1
		CDSN
		KRT10
		GPC3
		MIR93
		MIR106B
		FANCI
		DNMT3A
		IRF1
		CDK6
		SMAD7
		CD44
		LINC-ROR
		LOC100507346
		RHBDF2
		LAMB3
		PRKN
		TYRP1
		MIR122
		ABCC1
		TYMS
		KRT17
		MIR23B
		MIR15A
		AKT3
		SOS1
		ARAF
		MIR23A
		NKX2-1
		VDR
		CSTA
		CDKN1C
		TUBB
		CEBPA
		CASP3
		GNAQ
		GSTP1
		CDK2
		SLX4
		DRAIC
		FLT1
		HNF1B
		ELAC2
		BANCR
		MTHFR
		TLR4
		PLEC
		MIR25
		FLG2
		ABRAXAS1
		VEGFC
		MIR215
		FGF2
		CYP17A1
		MIR211
		BIVM-ERCC5
		MIR320A
		MIR96
		SOD2
		KCNQ1OT1
		FOXO1
		HLA-DRB1
		FERMT1
		CDH3
		CASC15
		BIRC5
		COL1A2
		MSR1
		MIR193A
		MIRLET7E
		DSG1
		HNF1A-AS1
		MIRLET7G
		HFE
		SOX9
		CFTR
		PCAT29
		CYLD
		MT-CYB
		DNMT1
		LOC129390903
		PALLD
		MIR10A
		SF3B2
		MAP3K1
		MKI67
		HOTTIP
		MIR373
		PDGFB
		KRT7
		ITGA6
		DCC
		KRT20
		GJB2
		BTK
		PCA3
		IL4
		HGF
		TLR2
		IL1A
		CAST
		XRCC1
		MIR27B
		SNHG16
		MIR451A
		PCNA
		NPM1
		HLA-B
		DLC1
		ABL1
		ICAM1
		MIR296
		CCDST
		ZFAS1
		PARP1
		PPP2R1A
		AKT2
		SOX2-OT
		RASSF1
		TGFB2
		MIR497
		CYP19A1
		WWOX
		MIR125B1
		LOX
		KLF6
		MIR98
		CASC8
		ZMPSTE24
		IL17A
		MIR152
		FOXP3
		SNHG1
		KLLN
		ZEB2
		ZEB1
		JAK1
		CASP10
		KEAP1
		BCYRN1
		MIR338
		BCAR4
		PRF1
		BMP4
		DDR2
		JAK3
		MIR24-1
		MIR424
		ADAR
		ELANE
		PGR
		MIR9-1
		MIAT
		JUP
		BUB1
		MIR34B
		FN1
		MIR494
		KDM6A
		LOC130001603
		EPHB2
		CYP1A1
		BMP6
		NOTCH3
		IL7R
		ODC1
		HMMR
		FGF10
		LRP1B
		PYCR1
		GSTT1
		KLK3
		SPP1
		MIR181B1
		SHC1
		POMC
		FBLN5
		SETD2
		MIR185
		PRNCR1
		PIK3CD
		AXL
		MIR130A
		ETV6
		AFAP1-AS1
		CTSB
		TWIST2
		AXIN1
		CAV1
		EXT2
		MIR29B2
		MIR7-3HG
		MIR16-1
		IRF4
		LOC111589215
		LUCAT1
		HLA-A
		ATP6V0A2
		DLEC1
		MIR216A
		ROCK1
		ASPRV1
		IGFBP3
		MIR26B
		ABCG2
		EPHB4
		TWIST1
		MED12
		DPYD
		WRAP53
		TCF7L2
		NSD1
		SNAI2
		MIR342
		ACTB
		MIR30B
		CTAG1B
		CCL2
		MIR331
		CYTOR
		CRNDE
		MAPK3
		XIAP
		MIR381
		FOXA1
		CEACAM5
		PLAU
		INS
		MIR324
		LOC107303340
		MIR132
		SLC2A1
		TNFRSF1A
		MIR181A2
		FOS
		MIR192
		IL2RA
		HSP90AA1
		ACTA2
		MIR26A1
		MIR128-2
		MIR101-1
		ALB
		ESR2
		DKC1
		PTCH2
		KRT2
		CSF3
		SOX10
		MIR429
		MAPRE2
		CSF2
		CCN2
		MIR107
		MIR15B
		MIRLET7I
		MIRLET7F1
		CD28
		INSR
		GSK3B
		CD4
		E2F1
		MIRLET7A1
		EXT1
		MMP14
		HCCS
		MYD88
		LDLR
		MIR193B
		FHIT
		POLK
		MIR32
		COL5A1
		TEK
		KMT2A
		CCND2
		ST14
		TP53BP1
		BCL10
		DANCR
		RARA
		MAP2K4
		MME
		NOTCH2
		PNPLA1
		MYCN
		TP53COR1
		SRA1
		MIR99B
		LIG4
		CXCL12
		PCAT6
		BCL2L1
		NME1
		PRKCA
		MIR375
		CD82
		CASR
		CD40LG
		KLF4
		SRD5A2
		MIR328
		MCL1
		HAGLR
		IL33
		CRP
		STAT5B
		TMPRSS2
		TGFA
		FALEC
		DNMT3B
		MIR148B
		HMGA2
		MIR197
		MIR151A
		MIR31HG
		MIR361
		MIR345
		CD36
		CERNA3
		LORICRIN
		SOCS1
		TNFRSF8
		TGFB3
		LOC130062899
		MIR212
		WEE1
		FOXM1
		CBR3-AS1
		IFNA1
		TNFRSF10B
		MAPK8
		IL7
		ABCA1
		FLNA
		IL18
		SEPTIN9
		HOXA11-AS
		SP1
		DSC3
		POLH
		IL13
		PTENP1
		SHOC2
		MAPK14
		LEP
		TSHR
		CD8A
		MIR202
		VIM
		MXI1
		DCTN5
		HSPB1
		NOS2
		TRPS1
		NCOR1
		TNFSF10
		LOC107303338
		MAPK10
		CLPTM1L
		RELA
		NOD2
		CSF1R
		RECK
		RNY3
		FLT3
		HLA-DQB1
		IAH1
		MIR483
		SNHG12
		TIMP1
		NQO1
		MIR181C
		ABCC4
		ETS1
		MIR485
		SASH1
		ERG
		KRT16
		PHB1
		PANDAR
		RTEL1
		TINCR
		RPS20
		TP73
		CDK1
		TOE1
		MIR423
		ATRIP
		KMT2C
		AHR
		PTK2
		CCL5
		MIR24-2
		MYH11
		NAA10
		SCHLAP1
		U2AF1
		TINF2
		CASP9
		FOXO3
		MIR374A
		RMRP
		CDKN3
		GATA1
		MIR124-1
		WNT10A
		HDAC1
		SNHG7
		LAMA3
		MMP7
		SNHG5
		RINT1
		CD40
		BMP2
		LINC02605
		TET2
		OGG1
		PBRM1
		TOP1
		MIRLET7A3
		THBS1
		BCAR1
		FGF7
		PRSS1
		PIK3R2
		LAMA5
		CHD1
		SERPINE1
		WNT5A
		CHUK
		KLC1
		EXOC2
		XPO1
		TOP2A
		PTPN3
		FANCB
		MIR135B
		BIRC3
		STAT6
		CASC19
		CASC9
		SPINK5
		RRAS2
		MIR498
		MMP3
		ITGA3
		ATP7A
		CLDN1
		MIR128-1
		MIR4733HG
		LOC111811965
		CSF1
		PORCN
		CASC11
		CTSD
		TNFAIP3
		SERPINB8
		MIR33A
		POU5F1
		TYMP
		MIR339
		IKBKG
		SOD1
		NAT2
		MUC2
		KIF1B
		GLI2
		ASIP
		MIR495
		TFRC
		MIR370
		LOC129933707
		CREB1
		CERS3
		PPP2R2A
		RNY1
		BCOR
		MPO
		PIK3CB
		AREG
		CALR
		MIR144
		LINC00673
		MIR503
		DST
		PPARA
		RBBP8
		SLC22A18
		MUC6
		MCC
		PCAT2
		CYP1B1
		EXO1
		GJB6
		CYP2A6
		GGCX
		MIR532
		CAT
		PTPRC
		MSMB
		RASA1
		RXRA
		CYCS
		CHD7
		TYK2
		NORAD
		ADA
		TCF3
		MIR92A1
		PCAT7
		SPARC
		IL3
		HDAC4
		LGALS3
		NR3C1
		COMT
		MIR206
		HOXA-AS2
		MIR378A
		ALOXE3
		IGF2R
		TSG101
		EWSR1
		ABCC6
		LEF1
		DROSHA
		NCSTN
		MIR95
		ALDH2
		GEN1
		MIR377
		ENO2
		IKZF1
		GACAT3
		KRT8
		TNFRSF1B
		PPARD
		PAX5
		GSN
		SNAI1
		PLCG1
		MIR302C
		CCND3
		PTHLH
		PRKCD
		FGF3
		UGT1A1
		RAD21
		SBDS
		MIR137
		SPRED1
		HMOX1
		IFNA2
		TIMP2
		PKM
		MIR28
		PLOD1
		SYK
		ALOX12B
		LOC126860438
		ACTC1
		FENDRR
		MIR184
		LNCRNA-ATB
		CD79A
		CD34
		EDN1
		STS
		RIOX2
		EFEMP2
		PPP2R1B
		ATP2A2
		RHOBTB2
		DSG2
		APEX1
		EPHA2
		G6PD
		IL5
		MIR130B
		PLK1
		MIR22HG
		DLL1
		RB1CC1
		REST
		HSPA4
		KRT18
		HLA-C
		GAPDH
		TRRAP
		KRT9
		TRIM24
		MAD1L1
		MIR486-1
		SERPINB4
		SKP2
		CDKN2C
		MYLK
		ZNF276
		PRKACA
		KLK7
		RIPK1
		LINC00511
		MT-CO1
		TFAP2A
		BDNF
		IDO1
		KDM4B
		MXRA5
		ADIPOQ
		NNT-AS1
		NLRP3
		MIR499A
		TSPAN31
		MIR92A2
		BDNF-AS
		TGFBR3
		CKS1B
		HMGB1
		GACAT2
		CTAG2
		SOD2-OT1
		IVL
		SOX18
		NPTN-IT1
		SPINK1
		NDUFB11
		CCR6
		DDX41
		ZFHX3
		GLI3
		MIR196B
		MMP13
		APOE
		PTPN6
		EPAS1
		ECM1
		CTCF
		MIR675
		RASA2
		STAT5A
		CALCA
		ERCC8
		ING1
		SKIL
		CTSC
		CCR7
		ABCC2
		CCDC26
		MIR301A
		BCL6
		CCNA2
		IL6R
		MIR425
		TCF7
		CXCL10
		CCL27
		BTNL2
		SOS2
		TFF1
		PCSEAT
		BMI1
		ITCH
		LINC00472
		AGO2
		DIS3L2
		DGCR5
		MPL
		NFKB2
		IKBKB
		MIR542
		MIR452
		PKHD1
		PROM1
		DMD
		EDAR
		FOXE1
		LOC126806659
		MTR
		CXCR3
		FBXO11
		SERPINA1
		DLEU1
		BCR
		ITGAM
		SST
		LDHA
		MIR181D
		RSPO1
		EGR1
		COX7B
		EDNRB
		TBX3
		ACVR1B
		TG
		AMER1
		E2F4
		PTK2B
		CDH2
		STAG2
		CCNB1
		HAVCR2
		SYP
		MIR136
		MIR491
		MIR186
		ANGPT2
		REV3L
		GLA
		KDM3A
		TIMP3
		MAP3K8
		PI3
		SCUBE3
		KL
		KPRP
		HSPA5
		NCOA3
		GHET1
		MIR134
		FADD
		MIR190A
		PLAUR
		USP48
		PRKD1
		JAG1
		SELE
		MECOM
		BLACAT1
		SIRT1
		LOC130002133
		GLS
		TTK
		ITGB3
		DDR1
		CFLAR
		RRAS
		SUZ12
		TNFSF11
		SLC24A5
		POSTN
		SLC19A1
		BCL2L12
		LIG1
		BSCL2
		MYB
		HBEGF
		PCAT14
		RYR1
		LOC110806263
		CD80
		PAX3
		FASN
		MIR196A2
		ZEB1-AS1
		PDPN
		GJB3
		PTPRD
		PSORS1C1
		IL2RB
		SOCS3
		TUBB3
		CDC25C
		COL5A2
		CYP2E1
		IL15
		SNHG6
		WT1-AS
		ARID1B
		PAX8
		MIR508
		ATP7B
		NGF
		MIR502
		ZNF469
		PREX2
		KDM1A
		TRB
		MIR125B2
		MIR376A1
		GRB2
		TMC8
		SMARCA2
		PSMB8
		GTF2H5
		GZMB
		CYP3A4
		HLA-DQA1
		SOX5
		CDX2
		PCAT18
		TLR7
		DKK1
		FGF4
		CXCL1
		HDAC9
		MIR138-1
		CYP2D6
		NEK2
		AURKB
		PDCD1LG2
		STAT4
		IL1R1
		DOCK8
		PAK4
		CASC22
		CNOT9
		SNHG15
		PCAT5
		KNSTRN
		PAH
		ADA2
		RABL3
		BLTP2
		SPEN
		PTPRJ
		IRAK4
		NRP1
		ITGB2
		APOB
		KRT6A
		CERNA2
		UHRF1
		MT-TT
		CDC42
		RAD54B
		CD70
		MIR511
		HSPD1
		PLCG2
		S100A8
		SQSTM1
		ALDH18A1
		VTN
		TCF4
		ANXA5
		RAB27A
		VCAN
		CDC25A
		LGALS1
		MED1
		MIR663A
		CTSE
		MIR219A1
		VCAM1
		AIFM1
		LYN
		MIR198
		ABCB6
		CD19
		LTBP4
		LRP1
		MIR29B1
		HIF1A-AS2
		BAK1
		LINC01234
		YTHDC2
		DUXAP9
		PECAM1
		MIF
		LTA
		AMACR
		PLG
		HABP2
		ASXL1
		CHGA
		EFEMP1
		COL2A1
		CHST14
		ADAMTS3
		TLR9
		RIT1
		MACF1
		MIR124-3
		NSUN2
		RBP4
		GDF15
		RUNX3
		GRHL2
		MIR154
		LCK
		NCAM1
		RPS6KB1
		EHBP1
		FUS
		HOTAIRM1
		PRL
		FOLH1
		S100A7
		IL12RB1
		TMC6
		MEFV
		ACD
		NKX3-1
		DPP4
		BRD4
		PML
		MPLKIP
		ITGA2
		MECP2
		ETV4
		CIB1
		ENO1
		KRT15
		VEGFD
		PLA2G2A
		THADA
		CBFB
		LOC106721785
		CUBN
		CYP1A2
		SYNE1
		NLRP1
		IRS1
		SMC3
		FBN2
		EDA
		NOS3
		HPGD
		ITGAV
		MUC5AC
		F3
		DSG4
		MNX1-AS1
		NECTIN4
		CAGE1
		AFP
		NBAT1
		TNXB
		MIR487B
		LOC130004614
		KIR3DL1
		LZTS1
		IGF2-AS
		MBD4
		MVK
		BANF1
		CLU
		THBS4
		NEK9
		SNHG20
		TUSC7
		SCARNA5
		B4GALT7
		CXCR2
		CSF3R
		CD46
		MDM4
		EGOT
		DCN
		MIR409
		CASP7
		ACE
		TFDP1
		MUC4
		CCR5
		S100A9
		CARD14
		IL6ST
		DCT
		PYHIN1
		MFN2
		MIR103A1
		LINC00261
		BCL2L11
		PAK1
		MAML1
		XRCC4
		RUNX1-AS1
		ANGPT1
		ABCC3
		ITGA5
		BGN
		EPHA3
		EIF2AK3
		IFIH1
		USP28
		FPR1
		SOX4
		HNRNPK
		S100A4
		GRP
		LOC130004273
		KLHL24
		FGF1
		IRS2
		H3-3A
		STK19
		MMP11
		PARD3
		XRCC6
		EDNRA
		EPHX1
		MIR372
		MAP3K6
		MIR432
		GLB1
		ATG13
		RMST
		WAS
		MALT1
		XBP1
		POU5F1B
		SNORD15A
		WNT1
		EZR
		JAZF1
		YY1
		ROBO1
		SGK1
		POLR1HASP
		UIMC1
		FAP
		CCL20
		F2RL1
		MIR196A1
		CUL1
		HLA-G
		BECN1
		MIR30C1
		NKILA
		WNT10B
		CD55
		CCN1
		RUNX2
		CTNND1
		EPOR
		TNFRSF10A
		MAGI2
		PHGDH
		IL36RN
		CD59
		IGFBP2
		KIR2DL3
		MT-ND1
		HPRT1
		KLK5
		ACVR1
		IFNB1
		FANCD2OS
		DNAH8
		OXA1L
		L1CAM
		MTAP
		MAGEA3
		PCSK9
		GBA1
		KCNN3
		MIR30D
		TFE3
		NOP10
		GSTM3
		DSE
		CEP57
		SCG5
		HMMR-AS1
		XRCC5
		CTC1
		GADD45A
		NCOR2
		MIRLET7F2
		MIR129-1
		TRAF5
		GLUL
		NGFR
		ELAVL1
		ZKSCAN1
		CYP27B1
		LINC01133
		VEGFB
		CD86
		PTPN12
		CASP1
		FCGR3B
		EPO
		GUSB
		TNFRSF11B
		KLRK1
		RPS19
		CEACAM3
		ERAP1
		BAD
		PTGS1
		KRT83
		IL22
		FSCN1
		THBS2
		CD151
		NQO2
		COL4A1
		MIR515-1
		MSN
		DSC2
		ANXA2
		DELEC1
		FER1L4
		KRT6B
		GPC6
		PSCA
		ENPP1
		POLN
		PDGFRL
		BSG
		EPB41L4A-DT
		RLIM
		HSPA9
		CD27
		CASP14
		CYP24A1
		EDN3
		MIR376C
		SETBP1
		HOXC13
		TOP2B
		GJB4
		COL11A1
		BMP7
		PKD1
		SEZ6L
		DAPK1
		TTR
		TNFSF4
		MIR340
		ID1
		PIM1
		STK4
		DDX3X
		IFI27
		MCM4
		ICOS
		DDIT3
		MYO5A
		CP
		TREX1
		CAND1
		CYSLTR1
		SEC23B
		NDRG1
		TRAF2
		SAMHD1
		INHBA
		MIR100HG
		OFD1
		APOA1
		STUB1
		MUC17
		HOXA11
		MAF
		ZEB2-AS1
		GPI
		GHR
		PTH
		SCN11A
		MYCL
		PPP2R5C
		ATP4A
		PPOX
		ADAMTS2
		SH2B3
		GRM8
		SLC2A10
		MIR337
		SULT1A1
		NIPAL4
		LIF
		HR
		BRINP1
		ILK
		LCN2
		ALOX5
		SHBG
		MIRLET7A2
		C3AR1
		H2AX
		GATA4
		PDK1
		FOXP1
		ALDH1A1
		EIF4EBP1
		EIF4E
		ITIH5
		ENPP7
		AKAP9
		TERF1
		COL18A1
		MYRF
		CARD11
		KLF5
		NR1H2
		ACVRL1
		FGF23
		KAT7
		HDAC6
		F2
		IL4R
		RPL5
		DEFB4A
		NFATC1
		GNRH1
		CRABP2
		PPP1CB
		SERPINB5
		BCL11B
		HMGCR
		SLURP1
		TNFRSF11A
		EDARADD
		YWHAE
		TRAF6
		PEPD
		CHST8
		PEG10
		DLEU2
		ALDH1A3
		MAGEA1
		OTX2
		TRPM3
		PCGEM1
		MST1R
		SNCG
		TUFT1
		SMC1A
		TBX20
		MLPH
		COPS6
		CR2
		FGF9
		ZNF224
		SULT2B1
		TNC
		PIEZO1
		HSPG2
		PXN
		HIC1
		SMUG1
		MIR501
		MIR4435-2HG
		HIP1
		ARHGEF15
		PHB2
		ADAM10
		MMP8
		FEZF1-AS1
		ALDOA
		C1S
		MIR379
		GRN
		ADRM1
		ZNF462
		ING4
		PLAG1
		TRAF3
		ATP2B4
		SLC39A13
		TF
		PIP
		UROD
		ETV1
		TNFRSF9
		HNF4A
		IL17F
		CIITA
		LOC109504725
		DLL4
		SMARCAD1
		HTR2C
		S100A2
		SNHG14
		GNE
		TKT
		SKI
		MIR20B
		KREMEN1
		HDAC2
		ISG15
		TNFRSF19
		NCOA2
		MIR449A
		MIR330
		ATP6V0A1
		ALOX12
		TLR3
		HOXA13
		SF3B3
		DVL1
		SRD5A1
		YBX1
		TSLP
		EXPH5
		HMBS
		EREG
		MYCBP2
		BIRC2
		CXCL9
		ANXA1
		CBY1
		LRRK2
		PRDM5
		SREBF1
		KISS1
		FOXC2
		PRKCB
		CD163
		ZAP70
		NHP2
		TERF2
		NOTCH4
		TERF2IP
		RRM1
		LTBP1
		IL11
		GORAB
		GATA6
		PPP6C
		VIP
		DSP-AS1
		IGFBP1
		LIFR
		HMGA1
		ANTXR1
		TAP1
		CAMP
		IRF5
		AP3B1
		CCR1
		BICDL3P
		KRT86
		STING1
		CSNK2A1
		CUL3
		SAMD9
		TGM2
		NT5E
		PLAT
		MIR518B
		RPS27A
		BMPR2
		RMI1
		UBE2T
		COL4A5
		PMEL
		RHEB
		NAT1
		POLR1C
		RIGI
		B3GALT6
		GRWD1
		HSPA8
		HLA-DPB1
		ACAT1
		SOX11
		EBAG9
		USB1
		ATP2C1
		PSAP
		KRT74
		NSD2
		CDH13
		TRIP13
		PIGH
		CUL4B
		ZNF304
		CUX1
		CSMD2
		VWF
		MIR382
		NES
		CTBP1
		FLI1
		PBOV1
		LEPR
		CXCR1
		FCGR3A
		TXN
		CTSL
		IL24
		SRSF2
		TRPC4
		DIS3L
		LINC01772
		LINC00958
		TRIP12
		PARN
		CCNH
		MIR455
		SLC39A7
		MRTFA
		KLK6
		ZNF667-AS1
		E2F3
		CA9
		FKBP14
		TNFRSF4
		MIR500A
		MMP10
		COL6A1
		MTHFD1
		EED
		CD9
		SLC6A9
		GFOD3P
		HPSE
		KNG1
		GPX4
		GAST
		ARG1
		WDFY3
		KIF12
		SERPINB3
		NRCAM
		RUNX1T1
		TPX2
		KLHL20
		MYH9
		SLC24A4
		SERPINB2
		IL16
		GCASPC
		SYNGR1
		ANO9
		HSP90AB1
		KIF16B
		MIR376B
		CHAC1
		ABCE1
		PDGFA
		SRGAP1
		FEN1
		MDC1-AS1
		NTN4
		CST6
		MAP3K14
		LBR
		RBPJ
		E2F2
		GFRA3
		EPHA5
		PGK1
		MBL2
		RASAL2
		LCP1
		MIR510
		CDC27
		APAF1
		MIR627
		LOC126807437
		EIF4G3
		HSD3B2
		NECTIN1
		F5
		SPINT2
		MTX2
		AIRE
		RIN2
		TBL1XR1
		RELB
		PPP1R13L
		CPOX
		FAM83C
		IQANK1
		PAX6
		DPP10-AS1
		GDF10
		GPR55
		PPP1R3C
		CTAG1A
		RAD52
		MIR605
		MIR103A2
		RPSA
		GDF3
		ARID2
		XDH
		TPM1
		FOXCUT
		FCGR2A
		IGF2BP3
		MAP3K7
		SFTPA2
		RPL11
		PCGF2
		MCM3
		MAPT
		MIR590
		HBB
		MIR16-2
		MIR302A
		FABP5
		MIR362
		AKAP1
		IL17RA
		MAT2A
		PHOX2B-AS1
		S100A6
		CCEPR
		FGF6
		CFH
		CCR2
		AGER
		BID
		STIM1
		MSH5
		KLK8
		CTSK
		CHGB
		FAM215A
		CABIN1
		GPER1
		PDHA1
		FOSL1
		CYP4F22
		CCL3
		FOXC1
		CASC16
		USP7
		HSD3B1
		CCL22
		KCNH2
		DPPA4
		LYST
		FOXP2
		LRP5
		CCNA1
		ANKRD26
		KDM5C
		ZMAT3
		LOC130058543
		MMP12
		CADM1
		BTRC
		WNT3
		ATF3
		OSM
		CT83
		ARAP3
		THBS3
		MSX1
		TRPV3
		IFNGR1
		RPA1
		INTS3
		IL2RG
		MBTPS2
		CT45A5
		TGIF1
		THPO
		URB2
		TAP2
		SSBP2
		EIF2AK2
		PTGER4
		EFNA3
		CRNKL1
		ARMC12
		CD247
		TAC1
		SFN
		PCBP2-OT1
		NPC1
		SLC46A3
		IL12B
		STX8
		PRDM1
		PEBP1
		EML4
		CALML5
		ERCC6L2
		FGF8
		CKAP5
		CD24
		PBX1
		TSHZ3
		CAMTA1
		EIF1AX
		ABCF3
		NCOA1
		SLC29A3
		SNHG17
		SDC1
		HAS2
		THBD
		SAMD9L
		LINC00052
		AQP5
		STRA6
		IRAIN
		TRPV1
		COL6A3
		IRF8
		NELL1
		CLDN7
		LINP1
		PRINS
		KRT33A
		RPTOR
		MIR574
		SERPINF1
		MIR19B1
		NOG
		CHI3L1
		LATS1
		PPP6R2
		DEK
		GFAP
		TNFRSF13B
		DIRC3
		DSG3
		FUCA1
		PTPN22
		CCL11
		MIR454
		PGBD3
		POLB
		SHCBP1L
		SSTR1
		F2R
		CARMIL2
		ROR2
		CEBPB
		MTDH
		RARS1
		UBA2
		GALNT3
		SORBS1
		GH1
		CCBE1
		CTTN
		WNT3A
		MTA1
		ITGAD
		SBNO1
		IGFBP5
		BBC3
		FGF19
		PRKG1
		LRP6
		FGD2
		FECH
		ITK
		FREM1
		CD79B
		TPCN2
		CLDN4
		CYBB
		SPATA18
		RECQL5
		SLC5A5
		DIABLO
		PDCD4
		MIR9-3
		MAGEA4
		GPT
		UBE3A
		TRIM28
		ITGB6
		TPI1
		NAPB
		C1R
		CACNA2D1
[truncated: 3,259 more rows]
