# Supplementary material for: Investigating the Association Between Azo Dyes and Skin Cancer Using Network Toxicology, Machine Learning, and Molecular Docking
Source: Research Square preprint supplement (doi:10.21203/rs.3.rs-6603799/v1), 2025-06-16
Supplement: Supplementary file 2 [file 7a74ee20d96425a71a8e164a.xlsx]

## Sheet: 附件4偶氮染料-skin cancer交集基因
skin cancer	偶氮染料	skin cancer∩偶氮染料
5094	156	164	分数
BRCA2	ADRA2C	CHEK2	185.062957763672
BRCA1	CA13	EGFR	164.67822265625
ATM	PLA2	BRAF	138.927917480469
TP53	DUSP3	PIK3CA	129.087539672852
PALB2	MAOB	RET	117.736419677734
MSH6	CA14	CDK4	103.22762298584
MSH2	CA4	PDGFRA	98.0507431030273
MLH1	ADRA2B	TERT	86.3149719238281
APC	HRH4	AR	79.9143676757813
BRIP1	PPO2	MAP2K1	76.3102722167969
CDH1	HTR6	PDGFRB	66.4035186767578
PTEN	ADRA2A	MDM2	64.4294891357422
NF1	GPR35	FGFR1	62.975757598877
PMS2	RIPK2	SRC	59.9417190551758
BARD1	CYP19	TNF	59.2723426818848
CDKN2A	CZP	NFE2L2	51.320068359375
AXIN2	PLIN5	DHFR	48.7756004333496
C11orf65	CHRM4	TGFBR1	47.1418762207031
POLD1	XDH/XO	PIK3CG	45.1627540588379
DICER1	CA5B	MMP9	43.1345672607422
POLE	S1PR4	RAC1	43.0232391357422
TSC2	TAAR1	PTGS2	42.2282447814941
MET	CA5A	NFKBIA	41.0510406494141
KRAS	CA1	JAK2	40.5285911560059
KIT	CES1	CDK2	37.235595703125
RAD50	CA7	CYP17A1	36.4951591491699
PTCH1	CLK1	DNMT1	35.5330390930176
STK11	TUBB2B	ABL1	34.5096054077148
ALK	HSD17B3	ICAM1	34.5005111694336
ERBB2	HTR3A	PARP1	34.2926483154297
NBN	mGluR5	CTSB	31.9250755310059
CTNNB1	CHRM1	ROCK1	31.4749393463135
RB1	ER	ABCG2	31.3014469146729
HRAS	CHRM2	HSP90AA1	30.3504371643066
SMAD4	CYP11B2	ESR2	30.1608695983887
MUTYH	H1R	GSK3B	29.7609977722168
BAP1	PDE7A	MCL1	28.6866016387939
BLM	P65	MAPK8	28.1538734436035
LOC126862571	mGluR2	MAPK14	27.9465522766113
SMARCA4	S6K1	NOS2	27.7218551635742
RAD51D	DRD4	MAPK10	27.6341018676758
AKT1	DRD1	CSF1R	27.5653781890869
RAD51C	CocE	FLT3	27.5115566253662
MSH3	CACNA1B	CDK1	27.0381851196289
NRAS	HTR1B	AHR	26.9026374816895
TSC1	GALR3	CASP9	26.6359920501709
FLCN	ADORA1	HDAC1	26.5045070648193
FH	HTR5A	PRSS1	26.2424125671387
MRE11	PR	PIK3CB	25.4469337463379
FGFR3	D2DR	PTPRC	25.1602306365967
BMPR1A	CHRNA4	TYK2	25.0940361022949
EPCAM	METAP2	HDAC4	24.8770313262939
MEN1	CA6	PLCG1	24.4813709259033
FBN1	HCAR2	SYK	24.2525405883789
FGFR2	REV	STS	24.1362476348877
RAD51L3-RFFL	CTDSP1	PRKACA	23.7244453430176
SDHA	DHFRTS	IKBKB	23.7244453430176
MYC	APOBEC3A	SIRT1	22.1404800415039
FANCC	ADRA1A	CYP3A4	21.7245750427246
CDKN1B	MR	CYP2D6	21.5870418548584
SDHB	LF	IRAK4	21.4155941009521
ATR	PTPN7	CDC42	21.3059616088867
ESR1	HTR4	VCAM1	21.1366996765137
VHL	PNMT	MIF	20.9849433898926
TYR	HTR1A	TLR9	20.8557357788086
CCND1	VEGFR2	LCK	20.7185497283936
CTNNA1	CHRM5	CYP1A2	20.4461
DSP	FAK1	NOS3	20.4009666442871
ERCC2	MGL	CXCR2	20.1785869598389
H19	NMDA2B	NGFR	19.065746307373
LZTR1	DRD5	PTGS1	18.9617252349854
MTOR	mGluR4	NQO2	18.9451599121094
HOXB13	SDNAT	PIM1	18.5942459106445
MIR21	NPY5R	DDX3X	18.5932998657227
RUNX1	SDST	ATP4A	18.3970584869385
NF2	CACNA1H	ALOX5	18.3404426574707
TGFBR2	ICMT	HNF4A	17.7601184844971
NTHL1	A2AR	HTR2C	17.7400436401367
PRKAR1A	HTR1E	HDAC2	17.7151737213135
SDHD	SDNT	LRRK2	17.5940170288086
SDHC	NMDA1	CSNK2A1	17.3816566467285
STAT3	TS	NT5E	17.3745269775391
SMARCB1	HTR7	CA9	17.0163459777832
POT1	FPPS	KCNH2	16.357120513916
SUFU	DAT	TRPV1	15.9053936004639
RECQL4	uPA	PTPN22	15.7993793487549
MC1R	A1R	DUSP1	15.3303
XRCC2	SERT	S100B	15.2289085388184
MLH3	BACE1	PRKCE	14.8864002227783
GNAS	PNR	CYP11B1	14.8146190643311
PIK3R1	NOP	CDK7	14.7293300628662
RAF1	HSP90A	BCL2A1	14.6751174926758
IDH1	CA	SLC9A1	14.6430339813232
LRRC56	PGHS-1	AKR1C3	14.6397132873535
FBXW7	GLD1	CYP2C19	14.4508953094482
HOTAIR	D1R	CDC25B	14.3763952255249
CDC73	GRM4	FYN	14.2512369155884
GAS5	CDKL5	RPS6KA3	13.9315204620361
EZH2	CHRFAM7A	HSD17B1	13.8753652572632
COL7A1	MGLL	HDAC3	13.6118803024292
MALAT1	CD45	RORA	13.3939647674561
ERCC5	CYP11B	APP	13.390212059021
NOTCH1	DHFR-TS	KIF11	13.2343454360962
IL6	FOLA	ACHE	13.1967363357544
UCA1	NR1H3	AGPAT2	13.1356563568115
RAD51	RAPGEF4	CMA1	13.0082979202271
TGFB1	GSK-3B	KAT2B	12.9758749008179
TMEM127	HSP90B	PTPN1	12.9434862136841
PVT1	CAH6	MAOA	12.9132671356201
IL1B	PSNR	MAPK9	12.9073543548584
FANCM	GRM2	CDK5	12.7503023147583
ERCC4	CB1	GRM1	12.6121883392334
CASP8	NMDAR	PNP	12.5548601150513
AOPEP	TEM-1	P2RX7	12.5060377120972
MIR125A	H3R	PIM2	12.0486698150635
GREM1	CLK4	SCN5A	12.0435314178467
MIR221	ANG1	S1PR2	11.8826150894165
ADAM17	CA3	CYP2C9	11.5577812194824
ERBB3	PDE3A	PTGES	11.1456718444824
ARID1A	ADK	AOC3	11.1181945800781
MITF	HRT5A	SOAT1	11.1029968261719
SDHAF2	PIK3Cb	ALPL	11.080545425415
RAG1	CES2	SIGMAR1	10.7704305648804
EP300	NCE103	SIRT2	10.5118007659912
CDKN2B-AS1	PSBA	MAPKAPK2	10.4959335327148
IDS	UPA	HSD17B2	10.4044427871704
TP63	CRF1R	DRD2	10.4032020568848
SMO	PDGFR	PRKCG	10.400972366333
PPARG	FADS1	GSK3A	10.3620939254761
FANCD2	t-PA	CHRM3	10.159387588501
LOC126806658	NACHRA4	NR2F2	10.0729675292969
MIR34A	mGluR	PHLPP2	9.98641014099121
MAPK1	CYNT	CNR1	9.80587291717529
MIR155	HTR3	ALOX15	9.5458869934082
XPC	PDGFR-B	TUBA1A	9.53358364105225
CREBBP	GRIN2B	CA2	9.33019256591797
CHEK1	APOBEC3	CDK9	9.27805137634277
FANCA	CHAT	APOBEC3G	9.27421474456787
WRN	HSP90	PRSS2	28.5783672332764
MIR17	TRKA	DHODH	9.23306274414063
KRT14	GLUR2	CA12	9.21832847595215
PMS1	DRD3	MAPK11	9.02930450439453
LMNA	MDR1	HSD11B2	8.89802646636963
OCA2	LTA4H	CHRNA7	8.85955715179443
NTRK1	MGLP	DYRK1A	8.79239845275879
BCL2	CTRA	CTSG	8.76186561584473
WT1	PDE2A	SLC6A3	8.7186164855957
XPA	VEGFR3	PDE4D	8.68177700042725
AIP	PDE10A	IMPDH2	8.56970310211182
HIF1A	MKK1	AKR1B1	8.54468154907227
CDKN1A	CD62E	HRH2	8.47095394134521
FAS	PKC	PDE4A	8.42100620269775
PTPN11	GRID2	PIM3	8.30300521850586
MIR146A	CRF1	SCN4A	8.24106979370117
IFNG	GR	NOS1	8.15672397613525
MIR145	TEM1	HTR2A	8.09770011901855
ERCC3		GPBAR1	8.06984519958496
MAX		HSD11B1	7.90023040771484
ERBB4		SLC6A4	7.62425374984741
MIR203A		CDC7	7.61311340332031
BUB1B		PLIN1	7.60804843902588
PKP1		S1PR1	7.50659370422363
PCAT1		CB2	7.38297462463379
CCAT1		NHE1	7.29603958129883
MIR210
VEGFA
MIR31
TUG1
MIR223
MIR146B
MEG3
CCAT2
PHOX2B
MIR30A
CDKN2B
MIR205
MAP2K2
MIR214
FASLG
MIR143
CTLA4
NEAT1
KDR
MIR222
JUN
MIR141
IL10
TGM5
IL2
CD274
SMAD3
MIR20A
BAX
MIR126
RAG2
KRT5
MUC16
KITLG
COL1A1
SOX2
MIR200C
B2M
CCNE1
MMP1
MIR27A
CXCR4
MIRLET7C
CXCL8
XRCC3
MMP2
MIR200B
RHOA
EGF
IL1RN
ITGB4
GATA2
DDB2
MIR29A
FLG
MIR34C
ABCA12
RNF43
MIR182
SMAD2
RARB
GATA3
IDH2
ITGB1
EGFR-AS1
HULC
CASC2
SMARCE1
COL17A1
MIR200A
GNA11
MIR106A
RAD51B
MIRLET7B
RNASEL
NFKB1
FANCG
MIR195
FLT4
MIR148A
PDCD1
GLI1
MGMT
IGF2
FANCL
MUC1
AURKA
ERCC1
MIR335
KMT2D
RAD54L
NRG1
IGF1
MIR29C
MIR140
FANCE
MIR18A
SPOP
IGF1R
GALNT12
MIR149
ENG
MIR100
ELN
CBS
MIR127
MIR181A1
SF3B1
MIRLET7D
MIR183
RECQL
SLC45A2
MIR22
MIR224
GJA1
NTRK2
SPRY4-IT1
NTRK3
CDK12
LAMC2
MIR199A1
MIR139
XIST
KRT1
FGFR4
SHH
PPM1D
GSTM1
MIR142
HERC2
YAP1
TERC
KRT19
ROS1
ERCC6
MIR204
MIR150
CBL
MIR99A
MIR191
MIR199B
MIR30E
MIR10B
ATRX
STAT1
MIR133B
COL3A1
FANCF
MIR19A
PRKDC
HNF1A
ABCB1
TGM1
CDSN
KRT10
GPC3
MIR93
MIR106B
FANCI
DNMT3A
IRF1
CDK6
SMAD7
CD44
LINC-ROR
LOC100507346
RHBDF2
LAMB3
PRKN
TYRP1
MIR122
ABCC1
TYMS
KRT17
MIR23B
MIR15A
AKT3
SOS1
ARAF
MIR23A
NKX2-1
VDR
CSTA
CDKN1C
TUBB
CEBPA
CASP3
GNAQ
GSTP1
SLX4
DRAIC
FLT1
HNF1B
ELAC2
BANCR
MTHFR
TLR4
PLEC
MIR25
FLG2
ABRAXAS1
VEGFC
MIR215
FGF2
MIR211
BIVM-ERCC5
MIR320A
MIR96
SOD2
KCNQ1OT1
FOXO1
HLA-DRB1
FERMT1
CDH3
CASC15
BIRC5
COL1A2
MSR1
MIR193A
MIRLET7E
DSG1
HNF1A-AS1
MIRLET7G
HFE
SOX9
CFTR
PCAT29
CYLD
MT-CYB
LOC129390903
PALLD
MIR10A
SF3B2
MAP3K1
MKI67
HOTTIP
MIR373
PDGFB
KRT7
ITGA6
DCC
KRT20
GJB2
BTK
PCA3
IL4
HGF
TLR2
IL1A
CAST
XRCC1
MIR27B
SNHG16
MIR451A
PCNA
NPM1
HLA-B
DLC1
MIR296
CCDST
ZFAS1
PPP2R1A
AKT2
SOX2-OT
RASSF1
TGFB2
MIR497
CYP19A1
WWOX
MIR125B1
LOX
KLF6
MIR98
CASC8
ZMPSTE24
IL17A
MIR152
FOXP3
SNHG1
KLLN
ZEB2
ZEB1
JAK1
CASP10
KEAP1
BCYRN1
MIR338
BCAR4
PRF1
BMP4
DDR2
JAK3
MIR24-1
MIR424
ADAR
ELANE
PGR
MIR9-1
MIAT
JUP
BUB1
MIR34B
FN1
MIR494
KDM6A
LOC130001603
EPHB2
CYP1A1
BMP6
NOTCH3
IL7R
ODC1
HMMR
FGF10
LRP1B
PYCR1
GSTT1
KLK3
SPP1
MIR181B1
SHC1
POMC
FBLN5
SETD2
MIR185
PRNCR1
PIK3CD
AXL
MIR130A
ETV6
AFAP1-AS1
TWIST2
AXIN1
CAV1
EXT2
MIR29B2
MIR7-3HG
MIR16-1
IRF4
LOC111589215
LUCAT1
HLA-A
ATP6V0A2
DLEC1
MIR216A
ASPRV1
IGFBP3
MIR26B
EPHB4
TWIST1
MED12
DPYD
WRAP53
TCF7L2
NSD1
SNAI2
MIR342
ACTB
MIR30B
CTAG1B
CCL2
MIR331
CYTOR
CRNDE
MAPK3
XIAP
MIR381
FOXA1
CEACAM5
PLAU
INS
MIR324
LOC107303340
MIR132
SLC2A1
TNFRSF1A
MIR181A2
FOS
MIR192
IL2RA
ACTA2
MIR26A1
MIR128-2
MIR101-1
ALB
DKC1
PTCH2
KRT2
CSF3
SOX10
MIR429
MAPRE2
CSF2
CCN2
MIR107
MIR15B
MIRLET7I
MIRLET7F1
CD28
INSR
CD4
E2F1
MIRLET7A1
EXT1
MMP14
HCCS
MYD88
LDLR
MIR193B
FHIT
POLK
MIR32
COL5A1
TEK
KMT2A
CCND2
ST14
TP53BP1
BCL10
DANCR
RARA
MAP2K4
MME
NOTCH2
PNPLA1
MYCN
TP53COR1
SRA1
MIR99B
LIG4
CXCL12
PCAT6
BCL2L1
NME1
PRKCA
MIR375
CD82
CASR
CD40LG
KLF4
SRD5A2
MIR328
HAGLR
IL33
CRP
STAT5B
TMPRSS2
TGFA
FALEC
DNMT3B
MIR148B
HMGA2
MIR197
MIR151A
MIR31HG
MIR361
MIR345
CD36
CERNA3
LORICRIN
SOCS1
TNFRSF8
TGFB3
LOC130062899
MIR212
WEE1
FOXM1
CBR3-AS1
IFNA1
TNFRSF10B
IL7
ABCA1
FLNA
IL18
SEPTIN9
HOXA11-AS
SP1
DSC3
POLH
IL13
PTENP1
SHOC2
LEP
TSHR
CD8A
MIR202
VIM
MXI1
DCTN5
HSPB1
TRPS1
NCOR1
TNFSF10
LOC107303338
CLPTM1L
RELA
NOD2
RECK
RNY3
HLA-DQB1
IAH1
MIR483
SNHG12
TIMP1
NQO1
MIR181C
ABCC4
ETS1
MIR485
SASH1
ERG
KRT16
PHB1
PANDAR
RTEL1
TINCR
RPS20
TP73
TOE1
MIR423
ATRIP
KMT2C
PTK2
CCL5
MIR24-2
MYH11
NAA10
SCHLAP1
U2AF1
TINF2
FOXO3
MIR374A
RMRP
CDKN3
GATA1
MIR124-1
WNT10A
SNHG7
LAMA3
MMP7
SNHG5
RINT1
CD40
BMP2
LINC02605
TET2
OGG1
PBRM1
TOP1
MIRLET7A3
THBS1
BCAR1
FGF7
PIK3R2
LAMA5
CHD1
SERPINE1
WNT5A
CHUK
KLC1
EXOC2
XPO1
TOP2A
PTPN3
FANCB
MIR135B
BIRC3
STAT6
CASC19
CASC9
SPINK5
RRAS2
MIR498
MMP3
ITGA3
ATP7A
CLDN1
MIR128-1
MIR4733HG
LOC111811965
CSF1
PORCN
CASC11
CTSD
TNFAIP3
SERPINB8
MIR33A
POU5F1
TYMP
MIR339
IKBKG
SOD1
NAT2
MUC2
KIF1B
GLI2
ASIP
MIR495
TFRC
MIR370
LOC129933707
CREB1
CERS3
PPP2R2A
RNY1
BCOR
MPO
AREG
CALR
MIR144
LINC00673
MIR503
DST
PPARA
RBBP8
SLC22A18
MUC6
MCC
PCAT2
CYP1B1
EXO1
GJB6
CYP2A6
GGCX
MIR532
CAT
MSMB
RASA1
RXRA
CYCS
CHD7
NORAD
ADA
TCF3
MIR92A1
PCAT7
SPARC
IL3
LGALS3
NR3C1
COMT
MIR206
HOXA-AS2
MIR378A
ALOXE3
IGF2R
TSG101
EWSR1
ABCC6
LEF1
DROSHA
NCSTN
MIR95
ALDH2
GEN1
MIR377
ENO2
IKZF1
GACAT3
KRT8
TNFRSF1B
PPARD
PAX5
GSN
SNAI1
MIR302C
CCND3
PTHLH
PRKCD
FGF3
UGT1A1
RAD21
SBDS
MIR137
SPRED1
HMOX1
IFNA2
TIMP2
PKM
MIR28
PLOD1
ALOX12B
LOC126860438
ACTC1
FENDRR
MIR184
LNCRNA-ATB
CD79A
CD34
EDN1
RIOX2
EFEMP2
PPP2R1B
ATP2A2
RHOBTB2
DSG2
APEX1
EPHA2
G6PD
IL5
MIR130B
PLK1
MIR22HG
DLL1
RB1CC1
REST
HSPA4
KRT18
HLA-C
GAPDH
TRRAP
KRT9
TRIM24
MAD1L1
MIR486-1
SERPINB4
SKP2
CDKN2C
MYLK
ZNF276
KLK7
RIPK1
LINC00511
MT-CO1
TFAP2A
BDNF
IDO1
KDM4B
MXRA5
ADIPOQ
NNT-AS1
NLRP3
MIR499A
TSPAN31
MIR92A2
BDNF-AS
TGFBR3
CKS1B
HMGB1
GACAT2
CTAG2
SOD2-OT1
IVL
SOX18
NPTN-IT1
SPINK1
NDUFB11
CCR6
DDX41
ZFHX3
GLI3
MIR196B
MMP13
APOE
PTPN6
EPAS1
ECM1
CTCF
MIR675
RASA2
STAT5A
CALCA
ERCC8
ING1
SKIL
CTSC
CCR7
ABCC2
CCDC26
MIR301A
BCL6
CCNA2
IL6R
MIR425
TCF7
CXCL10
CCL27
BTNL2
SOS2
TFF1
PCSEAT
BMI1
ITCH
LINC00472
AGO2
DIS3L2
DGCR5
MPL
NFKB2
MIR542
MIR452
PKHD1
PROM1
DMD
EDAR
FOXE1
LOC126806659
MTR
CXCR3
FBXO11
SERPINA1
DLEU1
BCR
ITGAM
SST
LDHA
MIR181D
RSPO1
EGR1
COX7B
EDNRB
TBX3
ACVR1B
TG
AMER1
E2F4
PTK2B
CDH2
STAG2
CCNB1
HAVCR2
SYP
MIR136
MIR491
MIR186
ANGPT2
REV3L
GLA
KDM3A
TIMP3
MAP3K8
PI3
SCUBE3
KL
KPRP
HSPA5
NCOA3
GHET1
MIR134
FADD
MIR190A
PLAUR
USP48
PRKD1
JAG1
SELE
MECOM
BLACAT1
LOC130002133
GLS
TTK
ITGB3
DDR1
CFLAR
RRAS
SUZ12
TNFSF11
SLC24A5
POSTN
SLC19A1
BCL2L12
LIG1
BSCL2
MYB
HBEGF
PCAT14
RYR1
LOC110806263
CD80
PAX3
FASN
MIR196A2
ZEB1-AS1
PDPN
GJB3
PTPRD
PSORS1C1
IL2RB
SOCS3
TUBB3
CDC25C
COL5A2
CYP2E1
IL15
SNHG6
WT1-AS
ARID1B
PAX8
MIR508
ATP7B
NGF
MIR502
ZNF469
PREX2
KDM1A
TRB
MIR125B2
MIR376A1
GRB2
TMC8
SMARCA2
PSMB8
GTF2H5
GZMB
HLA-DQA1
SOX5
CDX2
PCAT18
TLR7
DKK1
FGF4
CXCL1
HDAC9
MIR138-1
NEK2
AURKB
PDCD1LG2
STAT4
IL1R1
DOCK8
PAK4
CASC22
CNOT9
SNHG15
PCAT5
KNSTRN
PAH
ADA2
RABL3
BLTP2
SPEN
PTPRJ
NRP1
ITGB2
APOB
KRT6A
CERNA2
UHRF1
MT-TT
RAD54B
CD70
MIR511
HSPD1
PLCG2
S100A8
SQSTM1
ALDH18A1
VTN
TCF4
ANXA5
RAB27A
VCAN
CDC25A
LGALS1
MED1
MIR663A
CTSE
MIR219A1
AIFM1
LYN
MIR198
ABCB6
CD19
LTBP4
LRP1
MIR29B1
HIF1A-AS2
BAK1
LINC01234
YTHDC2
DUXAP9
PECAM1
LTA
AMACR
PLG
HABP2
ASXL1
CHGA
EFEMP1
COL2A1
CHST14
ADAMTS3
RIT1
MACF1
MIR124-3
NSUN2
RBP4
GDF15
RUNX3
GRHL2
MIR154
NCAM1
RPS6KB1
EHBP1
FUS
HOTAIRM1
PRL
FOLH1
S100A7
IL12RB1
TMC6
MEFV
ACD
NKX3-1
DPP4
BRD4
PML
MPLKIP
ITGA2
MECP2
ETV4
CIB1
ENO1
KRT15
VEGFD
PLA2G2A
THADA
CBFB
LOC106721785
CUBN
SYNE1
NLRP1
IRS1
SMC3
FBN2
EDA
HPGD
ITGAV
MUC5AC
F3
DSG4
MNX1-AS1
NECTIN4
CAGE1
AFP
NBAT1
TNXB
MIR487B
LOC130004614
KIR3DL1
LZTS1
IGF2-AS
MBD4
MVK
BANF1
CLU
THBS4
NEK9
SNHG20
TUSC7
SCARNA5
B4GALT7
CSF3R
CD46
MDM4
EGOT
DCN
MIR409
CASP7
ACE
TFDP1
MUC4
CCR5
S100A9
CARD14
IL6ST
DCT
PYHIN1
MFN2
MIR103A1
LINC00261
BCL2L11
PAK1
MAML1
XRCC4
RUNX1-AS1
ANGPT1
ABCC3
ITGA5
BGN
EPHA3
EIF2AK3
IFIH1
USP28
FPR1
SOX4
HNRNPK
S100A4
GRP
LOC130004273
KLHL24
FGF1
IRS2
H3-3A
STK19
MMP11
PARD3
XRCC6
EDNRA
EPHX1
MIR372
MAP3K6
MIR432
GLB1
ATG13
RMST
WAS
MALT1
XBP1
POU5F1B
SNORD15A
WNT1
EZR
JAZF1
YY1
ROBO1
SGK1
POLR1HASP
UIMC1
FAP
CCL20
F2RL1
MIR196A1
CUL1
HLA-G
BECN1
MIR30C1
NKILA
WNT10B
CD55
CCN1
RUNX2
CTNND1
EPOR
TNFRSF10A
MAGI2
PHGDH
IL36RN
CD59
IGFBP2
KIR2DL3
MT-ND1
HPRT1
KLK5
ACVR1
IFNB1
FANCD2OS
DNAH8
OXA1L
L1CAM
MTAP
MAGEA3
PCSK9
GBA1
KCNN3
MIR30D
TFE3
NOP10
GSTM3
DSE
CEP57
SCG5
HMMR-AS1
XRCC5
CTC1
GADD45A
NCOR2
MIRLET7F2
MIR129-1
TRAF5
GLUL
ELAVL1
ZKSCAN1
CYP27B1
LINC01133
VEGFB
CD86
PTPN12
CASP1
FCGR3B
EPO
GUSB
TNFRSF11B
KLRK1
RPS19
CEACAM3
ERAP1
BAD
KRT83
IL22
FSCN1
THBS2
CD151
COL4A1
MIR515-1
MSN
DSC2
ANXA2
DELEC1
FER1L4
KRT6B
GPC6
PSCA
ENPP1
POLN
PDGFRL
BSG
EPB41L4A-DT
RLIM
HSPA9
CD27
CASP14
CYP24A1
EDN3
MIR376C
SETBP1
HOXC13
TOP2B
GJB4
COL11A1
BMP7
PKD1
SEZ6L
DAPK1
TTR
TNFSF4
MIR340
ID1
STK4
IFI27
MCM4
ICOS
DDIT3
MYO5A
CP
TREX1
CAND1
CYSLTR1
SEC23B
NDRG1
TRAF2
SAMHD1
INHBA
MIR100HG
OFD1
APOA1
STUB1
MUC17
HOXA11
MAF
ZEB2-AS1
GPI
GHR
PTH
SCN11A
MYCL
PPP2R5C
PPOX
ADAMTS2
SH2B3
GRM8
SLC2A10
MIR337
SULT1A1
NIPAL4
LIF
HR
BRINP1
ILK
LCN2
SHBG
MIRLET7A2
C3AR1
H2AX
GATA4
PDK1
FOXP1
ALDH1A1
EIF4EBP1
EIF4E
ITIH5
ENPP7
AKAP9
TERF1
COL18A1
MYRF
CARD11
KLF5
NR1H2
ACVRL1
FGF23
KAT7
HDAC6
F2
IL4R
RPL5
DEFB4A
NFATC1
GNRH1
CRABP2
PPP1CB
SERPINB5
BCL11B
HMGCR
SLURP1
TNFRSF11A
EDARADD
YWHAE
TRAF6
PEPD
CHST8
PEG10
DLEU2
ALDH1A3
MAGEA1
OTX2
TRPM3
PCGEM1
MST1R
SNCG
TUFT1
SMC1A
TBX20
MLPH
COPS6
CR2
FGF9
ZNF224
SULT2B1
TNC
PIEZO1
HSPG2
PXN
HIC1
SMUG1
MIR501
MIR4435-2HG
HIP1
ARHGEF15
PHB2
ADAM10
MMP8
FEZF1-AS1
ALDOA
C1S
MIR379
GRN
ADRM1
ZNF462
ING4
PLAG1
TRAF3
ATP2B4
SLC39A13
TF
PIP
UROD
ETV1
TNFRSF9
IL17F
CIITA
LOC109504725
DLL4
SMARCAD1
S100A2
SNHG14
GNE
TKT
SKI
MIR20B
KREMEN1
ISG15
TNFRSF19
NCOA2
MIR449A
MIR330
ATP6V0A1
ALOX12
TLR3
HOXA13
SF3B3
DVL1
SRD5A1
YBX1
TSLP
EXPH5
HMBS
EREG
MYCBP2
BIRC2
CXCL9
ANXA1
CBY1
PRDM5
SREBF1
KISS1
FOXC2
PRKCB
CD163
ZAP70
NHP2
TERF2
NOTCH4
TERF2IP
RRM1
LTBP1
IL11
GORAB
GATA6
PPP6C
VIP
DSP-AS1
IGFBP1
LIFR
HMGA1
ANTXR1
TAP1
CAMP
IRF5
AP3B1
CCR1
BICDL3P
KRT86
STING1
CUL3
SAMD9
TGM2
PLAT
MIR518B
RPS27A
BMPR2
RMI1
UBE2T
COL4A5
PMEL
RHEB
NAT1
POLR1C
RIGI
B3GALT6
GRWD1
HSPA8
HLA-DPB1
ACAT1
SOX11
EBAG9
USB1
ATP2C1
PSAP
KRT74
NSD2
CDH13
TRIP13
PIGH
CUL4B
ZNF304
CUX1
CSMD2
VWF
MIR382
NES
CTBP1
FLI1
PBOV1
LEPR
CXCR1
FCGR3A
TXN
CTSL
IL24
SRSF2
TRPC4
DIS3L
LINC01772
LINC00958
TRIP12
PARN
CCNH
MIR455
SLC39A7
MRTFA
KLK6
ZNF667-AS1
E2F3
FKBP14
TNFRSF4
MIR500A
MMP10
COL6A1
MTHFD1
EED
CD9
SLC6A9
GFOD3P
HPSE
KNG1
GPX4
GAST
ARG1
WDFY3
KIF12
SERPINB3
NRCAM
RUNX1T1
TPX2
KLHL20
MYH9
SLC24A4
SERPINB2
IL16
GCASPC
SYNGR1
ANO9
HSP90AB1
KIF16B
MIR376B
CHAC1
ABCE1
PDGFA
SRGAP1
FEN1
MDC1-AS1
NTN4
CST6
MAP3K14
LBR
RBPJ
E2F2
GFRA3
EPHA5
PGK1
MBL2
RASAL2
LCP1
MIR510
CDC27
APAF1
MIR627
LOC126807437
EIF4G3
HSD3B2
NECTIN1
F5
SPINT2
MTX2
AIRE
RIN2
TBL1XR1
RELB
PPP1R13L
CPOX
FAM83C
IQANK1
PAX6
DPP10-AS1
GDF10
GPR55
PPP1R3C
CTAG1A
RAD52
MIR605
MIR103A2
RPSA
GDF3
ARID2
XDH
TPM1
FOXCUT
FCGR2A
IGF2BP3
MAP3K7
SFTPA2
RPL11
PCGF2
MCM3
MAPT
MIR590
HBB
MIR16-2
MIR302A
FABP5
MIR362
AKAP1
IL17RA
MAT2A
PHOX2B-AS1
S100A6
CCEPR
FGF6
CFH
CCR2
AGER
BID
STIM1
MSH5
KLK8
CTSK
CHGB
FAM215A
CABIN1
GPER1
PDHA1
FOSL1
CYP4F22
CCL3
FOXC1
CASC16
USP7
HSD3B1
CCL22
DPPA4
LYST
FOXP2
LRP5
CCNA1
ANKRD26
KDM5C
ZMAT3
LOC130058543
MMP12
CADM1
BTRC
WNT3
ATF3
OSM
CT83
ARAP3
THBS3
MSX1
TRPV3
IFNGR1
RPA1
INTS3
IL2RG
MBTPS2
CT45A5
TGIF1
THPO
URB2
TAP2
SSBP2
EIF2AK2
PTGER4
EFNA3
CRNKL1
ARMC12
CD247
TAC1
SFN
PCBP2-OT1
NPC1
SLC46A3
IL12B
STX8
PRDM1
PEBP1
EML4
CALML5
ERCC6L2
FGF8
CKAP5
CD24
PBX1
TSHZ3
CAMTA1
EIF1AX
ABCF3
NCOA1
SLC29A3
SNHG17
SDC1
HAS2
THBD
SAMD9L
LINC00052
AQP5
STRA6
IRAIN
COL6A3
IRF8
NELL1
CLDN7
LINP1
PRINS
KRT33A
RPTOR
MIR574
SERPINF1
MIR19B1
NOG
CHI3L1
LATS1
PPP6R2
DEK
GFAP
TNFRSF13B
DIRC3
DSG3
FUCA1
CCL11
MIR454
PGBD3
POLB
SHCBP1L
SSTR1
F2R
CARMIL2
ROR2
CEBPB
MTDH
RARS1
UBA2
GALNT3
SORBS1
GH1
CCBE1
CTTN
WNT3A
MTA1
ITGAD
SBNO1
IGFBP5
BBC3
FGF19
PRKG1
LRP6
FGD2
FECH
ITK
FREM1
CD79B
TPCN2
CLDN4
CYBB
SPATA18
RECQL5
SLC5A5
DIABLO
PDCD4
MIR9-3
MAGEA4
GPT
UBE3A
TRIM28
ITGB6
TPI1
NAPB
C1R
CACNA2D1
CPS1-IT1
F13A1
SMPD1
MSLN
CDH17
DGCR6L
RBAK
PERP
DLX3
ENOX1
OPCML
WNT7A
ELOVL4
PLCB4
ESRRA
ATP6V1E1
PALM2AKAP2
AHCY
THY1
BACE1-AS
MYO18A
BRMS1
PTPRK
DHX29
GPNMB
ASAH1
UGCG
SSX2
SCRN1
AICDA
CDH11
ZNF136
ADH1B
KLK11
FOXL2
CDKN2AIP
CADPS
PSEN1
DNAJC21
GPSM2
DUXAP10
CSMD3
MIR512-1
CD68
DPH7
LINC00628
IRAK1
GABRB2
C4A
ACP3
HNRNPUL2-BSCL2
PTPN21
PWAR1
MFAP5
RPL15
DNA2
TP53TG1
STMN1
HSPA1A
STN1
HAX1
WNT7B
IFNGR2
LAG3
PTTG1
GDF6
KDM5B
PRLR
RACK1
ANAPC1
ALCAM
MIR346
AGTR1
MIR129-2
CASZ1
MIR199A2
PRTN3
COL4A2
HUWE1
PPRC1
RPL10L
ZDHHC8
PDPK1
RPS10
HSF1
[truncated: 3,096 more rows]
