# Supplementary material for: Investigating the Association Between Azo Dyes and Skin Cancer Using Network Toxicology, Machine Learning, and Molecular Docking
Source: Research Square preprint supplement (doi:10.21203/rs.3.rs-6603799/v1), 2025-06-16
Supplement: Supplementary file 3 [file b01d32c615cad9ae322afdfe.docx]

Observed OS (%)

0.0

0.2

0.4

0.6

0.8

1.0

1−year 5−year 10−year


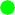

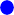

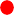


0.0 0.2 0.4 0.6 0.8 1.0

Nomogram−predicted OS (%)

Observed OS (%)

0.0

0.2

0.4

0.6

0.8

1.0

1−year 5−year 10−year


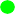

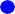

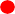


0.0 0.2 0.4 0.6 0.8 1.0

Nomogram−predicted OS (%)

Observed OS (%)

0.0

0.2

0.4

0.6

0.8

1.0

1−year 5−year 10−year


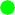

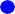

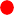


0.0 0.2 0.4 0.6 0.8 1.0

Nomogram−predicted OS (%)
