# Supplementary material for: Investigating the Association Between Azo Dyes and Skin Cancer Using Network Toxicology, Machine Learning, and Molecular Docking
Source: Research Square preprint supplement (doi:10.21203/rs.3.rs-6603799/v1), 2025-06-16
Supplement: Supplementary file 4 [file fe98c8a76a78d7bc3beac129.xlsx]

## Sheet: ProTox-3.0
ProTox-3.0 - Prediction of TOXicity of chemicals
	Classification	Target	Shorthand	Prediction	Probability
7251 4-Chloro-o-toluidine CC1=C(C=CC(=C1)Cl)N	Organ toxicity	Hepatotoxicity	dili	Inactive	0.69
	Organ toxicity	Neurotoxicity	neuro	Active	0.75
	Organ toxicity	Nephrotoxicity	nephro	Inactive	0.81
	Organ toxicity	Respiratory toxicity	respi	Inactive	0.91
	Organ toxicity	Cardiotoxicity	cardio	Inactive	0.82
	Toxicity end points	Carcinogenicity	carcino	Active	0.53
	Toxicity end points	Immunotoxicity	immuno	Inactive	0.97
	Toxicity end points	Mutagenicity	mutagen	Inactive	0.5
	Toxicity end points	Cytotoxicity	cyto	Inactive	0.78
	Toxicity end points	BBB-barrier	bbb	Active	0.94
	Toxicity end points	Ecotoxicity	eco	Active	0.82
	Toxicity end points	Clinical toxicity	clinical	Inactive	0.56
	Toxicity end points	Nutritional toxicity	nutri	Inactive	0.76
	Tox21-Nuclear receptor signalling pathways	Aryl hydrocarbon Receptor (AhR)	nr_ahr	Active	0.63
	Tox21-Nuclear receptor signalling pathways	Androgen Receptor (AR)	nr_ar	Inactive	1
	Tox21-Nuclear receptor signalling pathways	Androgen Receptor Ligand Binding Domain (AR-LBD)	nr_ar_lbd	Inactive	1
	Tox21-Nuclear receptor signalling pathways	Aromatase	nr_aromatase	Inactive	1
	Tox21-Nuclear receptor signalling pathways	Estrogen Receptor Alpha (ER)	nr_er	Inactive	0.99
	Tox21-Nuclear receptor signalling pathways	Estrogen Receptor Ligand Binding Domain (ER-LBD)	nr_er_lbd	Inactive	1
	Tox21-Nuclear receptor signalling pathways	Peroxisome Proliferator Activated Receptor Gamma (PPAR-Gamma)	nr_ppar_gamma	Inactive	1
	Tox21-Stress response pathways	Nuclear factor (erythroid-derived 2)-like 2/antioxidant responsive element (nrf2/ARE)	sr_are	Inactive	1
	Tox21-Stress response pathways	Heat shock factor response element (HSE)	sr_hse	Inactive	1
	Tox21-Stress response pathways	Mitochondrial Membrane Potential (MMP)	sr_mmp	Inactive	0.99
	Tox21-Stress response pathways	Phosphoprotein (Tumor Supressor) p53	sr_p53	Inactive	1
	Tox21-Stress response pathways	ATPase family AAA domain-containing protein 5 (ATAD5)	sr_atad5	Inactive	1
	Molecular Initiating Events	Thyroid hormone receptor alpha (THRα)	mie_thr_alpha	Inactive	0.97
	Molecular Initiating Events	Thyroid hormone receptor beta (THRβ)	mie_thr_beta	Inactive	0.87
	Molecular Initiating Events	Transtyretrin (TTR)	mie_ttr	Inactive	0.53
	Molecular Initiating Events	Ryanodine receptor (RYR)	mie_ryr	Inactive	0.97
	Molecular Initiating Events	GABA receptor (GABAR)	mie_gabar	Inactive	0.83
	Molecular Initiating Events	Glutamate N-methyl-D-aspartate receptor (NMDAR)	mie_nmdar	Inactive	0.68
	Molecular Initiating Events	alpha-amino-3-hydroxy-5-methyl-4-isoxazolepropionate receptor (AMPAR)	mie_ampar	Inactive	1
	Molecular Initiating Events	Kainate receptor (KAR)	mie_kar	Inactive	1
	Molecular Initiating Events	Achetylcholinesterase (AChE)	mie_ache	Active	0.54
	Molecular Initiating Events	Constitutive androstane receptor (CAR)	mie_car	Inactive	1
	Molecular Initiating Events	Pregnane X receptor (PXR)	mie_pxr	Inactive	0.84
	Molecular Initiating Events	NADH-quinone oxidoreductase (NADHOX)	mie_nadhox	Inactive	0.92
	Molecular Initiating Events	Voltage gated sodium channel (VGSC)	mie_vgsc	Inactive	0.72
	Molecular Initiating Events	Na+/I- symporter (NIS)	mie_nis	Inactive	0.95
	Metabolism	Cytochrome CYP1A2	CYP1A2	Active	0.77
	Metabolism	Cytochrome CYP2C19	CYP2C19	Inactive	0.77
	Metabolism	Cytochrome CYP2C9	CYP2C9	Inactive	0.77
	Metabolism	Cytochrome CYP2D6	CYP2D6	Active	0.52
	Metabolism	Cytochrome CYP3A4	CYP3A4	Inactive	0.88
	Metabolism	Cytochrome CYP2E1	CYP2E1	Inactive	0.98
7340 O-AMINOAZOTOLUENE CC1=CC=CC=C1N=NC2=CC(=C(C=C2)N)C	Organ toxicity	Hepatotoxicity	dili	Active	0.55
	Organ toxicity	Neurotoxicity	neuro	Active	0.7
	Organ toxicity	Nephrotoxicity	nephro	Inactive	0.87
	Organ toxicity	Respiratory toxicity	respi	Inactive	0.74
	Organ toxicity	Cardiotoxicity	cardio	Inactive	0.78
	Toxicity end points	Carcinogenicity	carcino	Active	0.84
	Toxicity end points	Immunotoxicity	immuno	Inactive	0.99
	Toxicity end points	Mutagenicity	mutagen	Active	0.98
	Toxicity end points	Cytotoxicity	cyto	Inactive	0.77
	Toxicity end points	BBB-barrier	bbb	Active	0.89
	Toxicity end points	Ecotoxicity	eco	Active	0.76
	Toxicity end points	Clinical toxicity	clinical	Inactive	0.61
	Toxicity end points	Nutritional toxicity	nutri	Inactive	0.73
	Tox21-Nuclear receptor signalling pathways	Aryl hydrocarbon Receptor (AhR)	nr_ahr	Active	0.99
	Tox21-Nuclear receptor signalling pathways	Androgen Receptor (AR)	nr_ar	Inactive	0.96
	Tox21-Nuclear receptor signalling pathways	Androgen Receptor Ligand Binding Domain (AR-LBD)	nr_ar_lbd	Inactive	1
	Tox21-Nuclear receptor signalling pathways	Aromatase	nr_aromatase	Inactive	0.93
	Tox21-Nuclear receptor signalling pathways	Estrogen Receptor Alpha (ER)	nr_er	Active	0.99
	Tox21-Nuclear receptor signalling pathways	Estrogen Receptor Ligand Binding Domain (ER-LBD)	nr_er_lbd	Inactive	0.81
	Tox21-Nuclear receptor signalling pathways	Peroxisome Proliferator Activated Receptor Gamma (PPAR-Gamma)	nr_ppar_gamma	Inactive	0.96
	Tox21-Stress response pathways	Nuclear factor (erythroid-derived 2)-like 2/antioxidant responsive element (nrf2/ARE)	sr_are	Inactive	0.99
	Tox21-Stress response pathways	Heat shock factor response element (HSE)	sr_hse	Inactive	0.99
	Tox21-Stress response pathways	Mitochondrial Membrane Potential (MMP)	sr_mmp	Active	0.53
	Tox21-Stress response pathways	Phosphoprotein (Tumor Supressor) p53	sr_p53	Inactive	0.96
	Tox21-Stress response pathways	ATPase family AAA domain-containing protein 5 (ATAD5)	sr_atad5	Active	1
	Molecular Initiating Events	Thyroid hormone receptor alpha (THRα)	mie_thr_alpha	Inactive	0.97
	Molecular Initiating Events	Thyroid hormone receptor beta (THRβ)	mie_thr_beta	Inactive	0.72
	Molecular Initiating Events	Transtyretrin (TTR)	mie_ttr	Inactive	0.64
	Molecular Initiating Events	Ryanodine receptor (RYR)	mie_ryr	Inactive	0.98
	Molecular Initiating Events	GABA receptor (GABAR)	mie_gabar	Inactive	0.78
	Molecular Initiating Events	Glutamate N-methyl-D-aspartate receptor (NMDAR)	mie_nmdar	Inactive	0.7
	Molecular Initiating Events	alpha-amino-3-hydroxy-5-methyl-4-isoxazolepropionate receptor (AMPAR)	mie_ampar	Inactive	1
	Molecular Initiating Events	Kainate receptor (KAR)	mie_kar	Inactive	1
	Molecular Initiating Events	Achetylcholinesterase (AChE)	mie_ache	Inactive	0.71
	Molecular Initiating Events	Constitutive androstane receptor (CAR)	mie_car	Inactive	1
	Molecular Initiating Events	Pregnane X receptor (PXR)	mie_pxr	Inactive	0.85
	Molecular Initiating Events	NADH-quinone oxidoreductase (NADHOX)	mie_nadhox	Inactive	0.96
	Molecular Initiating Events	Voltage gated sodium channel (VGSC)	mie_vgsc	Inactive	0.74
	Molecular Initiating Events	Na+/I- symporter (NIS)	mie_nis	Inactive	0.94
	Metabolism	Cytochrome CYP1A2	CYP1A2	Inactive	0.59
	Metabolism	Cytochrome CYP2C19	CYP2C19	Active	0.5
	Metabolism	Cytochrome CYP2C9	CYP2C9	Inactive	0.57
	Metabolism	Cytochrome CYP2D6	CYP2D6	Active	0.59
	Metabolism	Cytochrome CYP3A4	CYP3A4	Active	0.86
	Metabolism	Cytochrome CYP2E1	CYP2E1	Inactive	0.98
7444 2-Amino-4-nitrotoluene CC1=C(C=C(C=C1)[N+](=O)[O-])N	Organ toxicity	Hepatotoxicity	dili	Active	0.52
	Organ toxicity	Neurotoxicity	neuro	Inactive	0.65
	Organ toxicity	Nephrotoxicity	nephro	Inactive	0.71
	Organ toxicity	Respiratory toxicity	respi	Inactive	0.87
	Organ toxicity	Cardiotoxicity	cardio	Inactive	0.64
	Toxicity end points	Carcinogenicity	carcino	Active	0.79
	Toxicity end points	Immunotoxicity	immuno	Inactive	0.91
	Toxicity end points	Mutagenicity	mutagen	Active	0.99
	Toxicity end points	Cytotoxicity	cyto	Inactive	0.73
	Toxicity end points	BBB-barrier	bbb	Active	0.84
	Toxicity end points	Ecotoxicity	eco	Active	0.72
	Toxicity end points	Clinical toxicity	clinical	Inactive	0.7
	Toxicity end points	Nutritional toxicity	nutri	Inactive	0.79
	Tox21-Nuclear receptor signalling pathways	Aryl hydrocarbon Receptor (AhR)	nr_ahr	Active	1
	Tox21-Nuclear receptor signalling pathways	Androgen Receptor (AR)	nr_ar	Inactive	1
	Tox21-Nuclear receptor signalling pathways	Androgen Receptor Ligand Binding Domain (AR-LBD)	nr_ar_lbd	Inactive	0.99
	Tox21-Nuclear receptor signalling pathways	Aromatase	nr_aromatase	Inactive	1
	Tox21-Nuclear receptor signalling pathways	Estrogen Receptor Alpha (ER)	nr_er	Inactive	0.98
	Tox21-Nuclear receptor signalling pathways	Estrogen Receptor Ligand Binding Domain (ER-LBD)	nr_er_lbd	Inactive	1
	Tox21-Nuclear receptor signalling pathways	Peroxisome Proliferator Activated Receptor Gamma (PPAR-Gamma)	nr_ppar_gamma	Inactive	1
	Tox21-Stress response pathways	Nuclear factor (erythroid-derived 2)-like 2/antioxidant responsive element (nrf2/ARE)	sr_are	Inactive	1
	Tox21-Stress response pathways	Heat shock factor response element (HSE)	sr_hse	Inactive	1
	Tox21-Stress response pathways	Mitochondrial Membrane Potential (MMP)	sr_mmp	Inactive	0.98
	Tox21-Stress response pathways	Phosphoprotein (Tumor Supressor) p53	sr_p53	Inactive	1
	Tox21-Stress response pathways	ATPase family AAA domain-containing protein 5 (ATAD5)	sr_atad5	Inactive	1
	Molecular Initiating Events	Thyroid hormone receptor alpha (THRα)	mie_thr_alpha	Inactive	0.94
	Molecular Initiating Events	Thyroid hormone receptor beta (THRβ)	mie_thr_beta	Active	0.77
	Molecular Initiating Events	Transtyretrin (TTR)	mie_ttr	Inactive	0.51
	Molecular Initiating Events	Ryanodine receptor (RYR)	mie_ryr	Inactive	0.96
	Molecular Initiating Events	GABA receptor (GABAR)	mie_gabar	Inactive	0.76
	Molecular Initiating Events	Glutamate N-methyl-D-aspartate receptor (NMDAR)	mie_nmdar	Inactive	0.69
	Molecular Initiating Events	alpha-amino-3-hydroxy-5-methyl-4-isoxazolepropionate receptor (AMPAR)	mie_ampar	Inactive	0.99
	Molecular Initiating Events	Kainate receptor (KAR)	mie_kar	Inactive	1
	Molecular Initiating Events	Achetylcholinesterase (AChE)	mie_ache	Active	0.51
	Molecular Initiating Events	Constitutive androstane receptor (CAR)	mie_car	Inactive	1
	Molecular Initiating Events	Pregnane X receptor (PXR)	mie_pxr	Inactive	0.75
	Molecular Initiating Events	NADH-quinone oxidoreductase (NADHOX)	mie_nadhox	Inactive	0.94
	Molecular Initiating Events	Voltage gated sodium channel (VGSC)	mie_vgsc	Inactive	0.82
	Molecular Initiating Events	Na+/I- symporter (NIS)	mie_nis	Inactive	0.84
	Metabolism	Cytochrome CYP1A2	CYP1A2	Inactive	0.57
	Metabolism	Cytochrome CYP2C19	CYP2C19	Inactive	0.8
	Metabolism	Cytochrome CYP2C9	CYP2C9	Inactive	0.71
	Metabolism	Cytochrome CYP2D6	CYP2D6	Inactive	0.75
	Metabolism	Cytochrome CYP3A4	CYP3A4	Inactive	0.9
	Metabolism	Cytochrome CYP2E1	CYP2E1	Inactive	0.98
13283 4,4'-Methylene-bis(2-methylaniline) CC1=C(C=CC(=C1)CC2=CC(=C(C=C2)N)C)N	Organ toxicity	Hepatotoxicity	dili	Inactive	0.66
	Organ toxicity	Neurotoxicity	neuro	Active	0.69
	Organ toxicity	Nephrotoxicity	nephro	Inactive	0.87
	Organ toxicity	Respiratory toxicity	respi	Inactive	0.66
	Organ toxicity	Cardiotoxicity	cardio	Inactive	0.85
	Toxicity end points	Carcinogenicity	carcino	Active	0.93
	Toxicity end points	Immunotoxicity	immuno	Inactive	0.99
	Toxicity end points	Mutagenicity	mutagen	Active	0.88
	Toxicity end points	Cytotoxicity	cyto	Inactive	0.72
	Toxicity end points	BBB-barrier	bbb	Active	0.85
	Toxicity end points	Ecotoxicity	eco	Active	0.81
	Toxicity end points	Clinical toxicity	clinical	Inactive	0.59
	Toxicity end points	Nutritional toxicity	nutri	Inactive	0.8
	Tox21-Nuclear receptor signalling pathways	Aryl hydrocarbon Receptor (AhR)	nr_ahr	Active	0.74
	Tox21-Nuclear receptor signalling pathways	Androgen Receptor (AR)	nr_ar	Inactive	0.99
	Tox21-Nuclear receptor signalling pathways	Androgen Receptor Ligand Binding Domain (AR-LBD)	nr_ar_lbd	Inactive	0.99
	Tox21-Nuclear receptor signalling pathways	Aromatase	nr_aromatase	Inactive	0.97
	Tox21-Nuclear receptor signalling pathways	Estrogen Receptor Alpha (ER)	nr_er	Inactive	0.94
	Tox21-Nuclear receptor signalling pathways	Estrogen Receptor Ligand Binding Domain (ER-LBD)	nr_er_lbd	Inactive	0.88
	Tox21-Nuclear receptor signalling pathways	Peroxisome Proliferator Activated Receptor Gamma (PPAR-Gamma)	nr_ppar_gamma	Inactive	0.99
	Tox21-Stress response pathways	Nuclear factor (erythroid-derived 2)-like 2/antioxidant responsive element (nrf2/ARE)	sr_are	Inactive	0.96
	Tox21-Stress response pathways	Heat shock factor response element (HSE)	sr_hse	Inactive	0.96
	Tox21-Stress response pathways	Mitochondrial Membrane Potential (MMP)	sr_mmp	Inactive	0.87
	Tox21-Stress response pathways	Phosphoprotein (Tumor Supressor) p53	sr_p53	Inactive	0.96
	Tox21-Stress response pathways	ATPase family AAA domain-containing protein 5 (ATAD5)	sr_atad5	Inactive	0.97
	Molecular Initiating Events	Thyroid hormone receptor alpha (THRα)	mie_thr_alpha	Inactive	0.96
	Molecular Initiating Events	Thyroid hormone receptor beta (THRβ)	mie_thr_beta	Inactive	0.77
	Molecular Initiating Events	Transtyretrin (TTR)	mie_ttr	Inactive	0.63
	Molecular Initiating Events	Ryanodine receptor (RYR)	mie_ryr	Inactive	0.99
	Molecular Initiating Events	GABA receptor (GABAR)	mie_gabar	Inactive	0.84
	Molecular Initiating Events	Glutamate N-methyl-D-aspartate receptor (NMDAR)	mie_nmdar	Inactive	0.56
	Molecular Initiating Events	alpha-amino-3-hydroxy-5-methyl-4-isoxazolepropionate receptor (AMPAR)	mie_ampar	Inactive	1
	Molecular Initiating Events	Kainate receptor (KAR)	mie_kar	Inactive	1
	Molecular Initiating Events	Achetylcholinesterase (AChE)	mie_ache	Inactive	0.83
	Molecular Initiating Events	Constitutive androstane receptor (CAR)	mie_car	Inactive	1
	Molecular Initiating Events	Pregnane X receptor (PXR)	mie_pxr	Inactive	0.9
	Molecular Initiating Events	NADH-quinone oxidoreductase (NADHOX)	mie_nadhox	Inactive	0.95
	Molecular Initiating Events	Voltage gated sodium channel (VGSC)	mie_vgsc	Inactive	0.71
	Molecular Initiating Events	Na+/I- symporter (NIS)	mie_nis	Inactive	0.95
	Metabolism	Cytochrome CYP1A2	CYP1A2	Inactive	0.56
	Metabolism	Cytochrome CYP2C19	CYP2C19	Active	0.52
	Metabolism	Cytochrome CYP2C9	CYP2C9	Inactive	0.58
	Metabolism	Cytochrome CYP2D6	CYP2D6	Active	0.66
	Metabolism	Cytochrome CYP3A4	CYP3A4	Inactive	0.54
	Metabolism	Cytochrome CYP2E1	CYP2E1	Inactive	0.99
8445 p-Cresidine CC1=CC(=C(C=C1)OC)N	Organ toxicity	Hepatotoxicity	dili	Inactive	0.58
	Organ toxicity	Neurotoxicity	neuro	Active	0.79
	Organ toxicity	Nephrotoxicity	nephro	Inactive	0.72
	Organ toxicity	Respiratory toxicity	respi	Inactive	0.93
	Organ toxicity	Cardiotoxicity	cardio	Inactive	0.69
	Toxicity end points	Carcinogenicity	carcino	Active	0.95
	Toxicity end points	Immunotoxicity	immuno	Inactive	0.96
	Toxicity end points	Mutagenicity	mutagen	Active	0.96
	Toxicity end points	Cytotoxicity	cyto	Inactive	0.65
	Toxicity end points	BBB-barrier	bbb	Active	0.73
	Toxicity end points	Ecotoxicity	eco	Active	0.7
	Toxicity end points	Clinical toxicity	clinical	Inactive	0.55
	Toxicity end points	Nutritional toxicity	nutri	Inactive	0.91
	Tox21-Nuclear receptor signalling pathways	Aryl hydrocarbon Receptor (AhR)	nr_ahr	Inactive	0.54
	Tox21-Nuclear receptor signalling pathways	Androgen Receptor (AR)	nr_ar	Inactive	1
	Tox21-Nuclear receptor signalling pathways	Androgen Receptor Ligand Binding Domain (AR-LBD)	nr_ar_lbd	Inactive	1
	Tox21-Nuclear receptor signalling pathways	Aromatase	nr_aromatase	Inactive	1
	Tox21-Nuclear receptor signalling pathways	Estrogen Receptor Alpha (ER)	nr_er	Inactive	0.97
	Tox21-Nuclear receptor signalling pathways	Estrogen Receptor Ligand Binding Domain (ER-LBD)	nr_er_lbd	Inactive	1
	Tox21-Nuclear receptor signalling pathways	Peroxisome Proliferator Activated Receptor Gamma (PPAR-Gamma)	nr_ppar_gamma	Inactive	0.99
	Tox21-Stress response pathways	Nuclear factor (erythroid-derived 2)-like 2/antioxidant responsive element (nrf2/ARE)	sr_are	Inactive	0.99
	Tox21-Stress response pathways	Heat shock factor response element (HSE)	sr_hse	Inactive	0.99
	Tox21-Stress response pathways	Mitochondrial Membrane Potential (MMP)	sr_mmp	Inactive	0.98
	Tox21-Stress response pathways	Phosphoprotein (Tumor Supressor) p53	sr_p53	Inactive	0.99
	Tox21-Stress response pathways	ATPase family AAA domain-containing protein 5 (ATAD5)	sr_atad5	Inactive	0.99
	Molecular Initiating Events	Thyroid hormone receptor alpha (THRα)	mie_thr_alpha	Inactive	0.9
	Molecular Initiating Events	Thyroid hormone receptor beta (THRβ)	mie_thr_beta	Inactive	0.85
	Molecular Initiating Events	Transtyretrin (TTR)	mie_ttr	Active	0.58
	Molecular Initiating Events	Ryanodine receptor (RYR)	mie_ryr	Inactive	0.95
	Molecular Initiating Events	GABA receptor (GABAR)	mie_gabar	Inactive	0.61
	Molecular Initiating Events	Glutamate N-methyl-D-aspartate receptor (NMDAR)	mie_nmdar	Inactive	0.88
	Molecular Initiating Events	alpha-amino-3-hydroxy-5-methyl-4-isoxazolepropionate receptor (AMPAR)	mie_ampar	Inactive	1
	Molecular Initiating Events	Kainate receptor (KAR)	mie_kar	Inactive	1
	Molecular Initiating Events	Achetylcholinesterase (AChE)	mie_ache	Inactive	0.61
	Molecular Initiating Events	Constitutive androstane receptor (CAR)	mie_car	Inactive	0.99
	Molecular Initiating Events	Pregnane X receptor (PXR)	mie_pxr	Inactive	0.79
	Molecular Initiating Events	NADH-quinone oxidoreductase (NADHOX)	mie_nadhox	Inactive	0.84
	Molecular Initiating Events	Voltage gated sodium channel (VGSC)	mie_vgsc	Inactive	0.61
	Molecular Initiating Events	Na+/I- symporter (NIS)	mie_nis	Inactive	0.97
	Metabolism	Cytochrome CYP1A2	CYP1A2	Active	0.51
	Metabolism	Cytochrome CYP2C19	CYP2C19	Inactive	0.67
	Metabolism	Cytochrome CYP2C9	CYP2C9	Inactive	0.7
	Metabolism	Cytochrome CYP2D6	CYP2D6	Inactive	0.61
	Metabolism	Cytochrome CYP3A4	CYP3A4	Inactive	0.75
	Metabolism	Cytochrome CYP2E1	CYP2E1	Inactive	0.99
8765 4,4,-Thiodianiline C1=CC(=CC=C1N)SC2=CC=C(C=C2)N	Organ toxicity	Hepatotoxicity	dili	Inactive	0.66
	Organ toxicity	Neurotoxicity	neuro	Active	0.69
	Organ toxicity	Nephrotoxicity	nephro	Inactive	0.87
	Organ toxicity	Respiratory toxicity	respi	Inactive	0.66
	Organ toxicity	Cardiotoxicity	cardio	Inactive	0.85
	Toxicity end points	Carcinogenicity	carcino	Active	0.93
	Toxicity end points	Immunotoxicity	immuno	Inactive	0.99
	Toxicity end points	Mutagenicity	mutagen	Active	0.88
	Toxicity end points	Cytotoxicity	cyto	Inactive	0.72
	Toxicity end points	BBB-barrier	bbb	Active	0.85
	Toxicity end points	Ecotoxicity	eco	Active	0.81
	Toxicity end points	Clinical toxicity	clinical	Inactive	0.59
	Toxicity end points	Nutritional toxicity	nutri	Inactive	0.8
	Tox21-Nuclear receptor signalling pathways	Aryl hydrocarbon Receptor (AhR)	nr_ahr	Active	0.74
	Tox21-Nuclear receptor signalling pathways	Androgen Receptor (AR)	nr_ar	Inactive	0.99
	Tox21-Nuclear receptor signalling pathways	Androgen Receptor Ligand Binding Domain (AR-LBD)	nr_ar_lbd	Inactive	0.99
	Tox21-Nuclear receptor signalling pathways	Aromatase	nr_aromatase	Inactive	0.97
	Tox21-Nuclear receptor signalling pathways	Estrogen Receptor Alpha (ER)	nr_er	Inactive	0.94
	Tox21-Nuclear receptor signalling pathways	Estrogen Receptor Ligand Binding Domain (ER-LBD)	nr_er_lbd	Inactive	0.88
	Tox21-Nuclear receptor signalling pathways	Peroxisome Proliferator Activated Receptor Gamma (PPAR-Gamma)	nr_ppar_gamma	Inactive	0.99
	Tox21-Stress response pathways	Nuclear factor (erythroid-derived 2)-like 2/antioxidant responsive element (nrf2/ARE)	sr_are	Inactive	0.96
	Tox21-Stress response pathways	Heat shock factor response element (HSE)	sr_hse	Inactive	0.96
	Tox21-Stress response pathways	Mitochondrial Membrane Potential (MMP)	sr_mmp	Inactive	0.87
	Tox21-Stress response pathways	Phosphoprotein (Tumor Supressor) p53	sr_p53	Inactive	0.96
	Tox21-Stress response pathways	ATPase family AAA domain-containing protein 5 (ATAD5)	sr_atad5	Inactive	0.97
	Molecular Initiating Events	Thyroid hormone receptor alpha (THRα)	mie_thr_alpha	Inactive	0.96
	Molecular Initiating Events	Thyroid hormone receptor beta (THRβ)	mie_thr_beta	Inactive	0.77
	Molecular Initiating Events	Transtyretrin (TTR)	mie_ttr	Inactive	0.63
	Molecular Initiating Events	Ryanodine receptor (RYR)	mie_ryr	Inactive	0.99
	Molecular Initiating Events	GABA receptor (GABAR)	mie_gabar	Inactive	0.84
	Molecular Initiating Events	Glutamate N-methyl-D-aspartate receptor (NMDAR)	mie_nmdar	Inactive	0.56
	Molecular Initiating Events	alpha-amino-3-hydroxy-5-methyl-4-isoxazolepropionate receptor (AMPAR)	mie_ampar	Inactive	1
	Molecular Initiating Events	Kainate receptor (KAR)	mie_kar	Inactive	1
	Molecular Initiating Events	Achetylcholinesterase (AChE)	mie_ache	Inactive	0.83
	Molecular Initiating Events	Constitutive androstane receptor (CAR)	mie_car	Inactive	1
	Molecular Initiating Events	Pregnane X receptor (PXR)	mie_pxr	Inactive	0.9
	Molecular Initiating Events	NADH-quinone oxidoreductase (NADHOX)	mie_nadhox	Inactive	0.95
	Molecular Initiating Events	Voltage gated sodium channel (VGSC)	mie_vgsc	Inactive	0.71
	Molecular Initiating Events	Na+/I- symporter (NIS)	mie_nis	Inactive	0.95
	Metabolism	Cytochrome CYP1A2	CYP1A2	Inactive	0.56
	Metabolism	Cytochrome CYP2C19	CYP2C19	Active	0.52
	Metabolism	Cytochrome CYP2C9	CYP2C9	Inactive	0.58
	Metabolism	Cytochrome CYP2D6	CYP2D6	Active	0.66
	Metabolism	Cytochrome CYP3A4	CYP3A4	Inactive	0.54
	Metabolism	Cytochrome CYP2E1	CYP2E1	Inactive	0.99
7242 o-Toluidine CC1=CC=CC=C1N	Organ toxicity	Hepatotoxicity	dili	Inactive	0.66
	Organ toxicity	Neurotoxicity	neuro	Active	0.7
	Organ toxicity	Nephrotoxicity	nephro	Inactive	0.86
	Organ toxicity	Respiratory toxicity	respi	Inactive	0.95
	Organ toxicity	Cardiotoxicity	cardio	Inactive	0.86
	Toxicity end points	Carcinogenicity	carcino	Active	0.78
	Toxicity end points	Immunotoxicity	immuno	Inactive	0.99
	Toxicity end points	Mutagenicity	mutagen	Active	0.93
	Toxicity end points	Cytotoxicity	cyto	Inactive	0.79
	Toxicity end points	BBB-barrier	bbb	Active	0.96
	Toxicity end points	Ecotoxicity	eco	Active	0.79
	Toxicity end points	Clinical toxicity	clinical	Inactive	0.58
	Toxicity end points	Nutritional toxicity	nutri	Inactive	0.75
	Tox21-Nuclear receptor signalling pathways	Aryl hydrocarbon Receptor (AhR)	nr_ahr	Inactive	0.78
	Tox21-Nuclear receptor signalling pathways	Androgen Receptor (AR)	nr_ar	Inactive	1
	Tox21-Nuclear receptor signalling pathways	Androgen Receptor Ligand Binding Domain (AR-LBD)	nr_ar_lbd	Inactive	1
	Tox21-Nuclear receptor signalling pathways	Aromatase	nr_aromatase	Inactive	0.99
	Tox21-Nuclear receptor signalling pathways	Estrogen Receptor Alpha (ER)	nr_er	Inactive	0.83
	Tox21-Nuclear receptor signalling pathways	Estrogen Receptor Ligand Binding Domain (ER-LBD)	nr_er_lbd	Inactive	1
	Tox21-Nuclear receptor signalling pathways	Peroxisome Proliferator Activated Receptor Gamma (PPAR-Gamma)	nr_ppar_gamma	Inactive	1
	Tox21-Stress response pathways	Nuclear factor (erythroid-derived 2)-like 2/antioxidant responsive element (nrf2/ARE)	sr_are	Inactive	0.98
	Tox21-Stress response pathways	Heat shock factor response element (HSE)	sr_hse	Inactive	0.98
	Tox21-Stress response pathways	Mitochondrial Membrane Potential (MMP)	sr_mmp	Inactive	0.98
	Tox21-Stress response pathways	Phosphoprotein (Tumor Supressor) p53	sr_p53	Inactive	1
	Tox21-Stress response pathways	ATPase family AAA domain-containing protein 5 (ATAD5)	sr_atad5	Inactive	0.98
	Molecular Initiating Events	Thyroid hormone receptor alpha (THRα)	mie_thr_alpha	Inactive	0.97
	Molecular Initiating Events	Thyroid hormone receptor beta (THRβ)	mie_thr_beta	Inactive	0.86
	Molecular Initiating Events	Transtyretrin (TTR)	mie_ttr	Inactive	0.61
	Molecular Initiating Events	Ryanodine receptor (RYR)	mie_ryr	Inactive	0.98
	Molecular Initiating Events	GABA receptor (GABAR)	mie_gabar	Inactive	0.8
	Molecular Initiating Events	Glutamate N-methyl-D-aspartate receptor (NMDAR)	mie_nmdar	Inactive	0.71
	Molecular Initiating Events	alpha-amino-3-hydroxy-5-methyl-4-isoxazolepropionate receptor (AMPAR)	mie_ampar	Inactive	1
	Molecular Initiating Events	Kainate receptor (KAR)	mie_kar	Inactive	1
	Molecular Initiating Events	Achetylcholinesterase (AChE)	mie_ache	Active	0.65
	Molecular Initiating Events	Constitutive androstane receptor (CAR)	mie_car	Inactive	1
	Molecular Initiating Events	Pregnane X receptor (PXR)	mie_pxr	Inactive	0.88
	Molecular Initiating Events	NADH-quinone oxidoreductase (NADHOX)	mie_nadhox	Inactive	0.89
	Molecular Initiating Events	Voltage gated sodium channel (VGSC)	mie_vgsc	Inactive	0.76
	Molecular Initiating Events	Na+/I- symporter (NIS)	mie_nis	Inactive	0.95
	Metabolism	Cytochrome CYP1A2	CYP1A2	Active	0.54
	Metabolism	Cytochrome CYP2C19	CYP2C19	Inactive	0.63
	Metabolism	Cytochrome CYP2C9	CYP2C9	Inactive	0.74
	Metabolism	Cytochrome CYP2D6	CYP2D6	Inactive	0.52
	Metabolism	Cytochrome CYP3A4	CYP3A4	Inactive	0.89
	Metabolism	Cytochrome CYP2E1	CYP2E1	Inactive	0.97
8717 2,4,5-Trimethylaniline CC1=CC(=C(C=C1C)N)C	Organ toxicity	Hepatotoxicity	dili	Inactive	0.68
	Organ toxicity	Neurotoxicity	neuro	Active	0.72
	Organ toxicity	Nephrotoxicity	nephro	Inactive	0.85
	Organ toxicity	Respiratory toxicity	respi	Inactive	0.93
	Organ toxicity	Cardiotoxicity	cardio	Inactive	0.88
	Toxicity end points	Carcinogenicity	carcino	Active	0.93
	Toxicity end points	Immunotoxicity	immuno	Inactive	0.98
	Toxicity end points	Mutagenicity	mutagen	Active	0.95
	Toxicity end points	Cytotoxicity	cyto	Inactive	0.76
	Toxicity end points	BBB-barrier	bbb	Active	0.96
	Toxicity end points	Ecotoxicity	eco	Active	0.75
	Toxicity end points	Clinical toxicity	clinical	Inactive	0.59
	Toxicity end points	Nutritional toxicity	nutri	Inactive	0.82
	Tox21-Nuclear receptor signalling pathways	Aryl hydrocarbon Receptor (AhR)	nr_ahr	Inactive	0.82
	Tox21-Nuclear receptor signalling pathways	Androgen Receptor (AR)	nr_ar	Inactive	1
	Tox21-Nuclear receptor signalling pathways	Androgen Receptor Ligand Binding Domain (AR-LBD)	nr_ar_lbd	Inactive	1
	Tox21-Nuclear receptor signalling pathways	Aromatase	nr_aromatase	Inactive	1
	Tox21-Nuclear receptor signalling pathways	Estrogen Receptor Alpha (ER)	nr_er	Inactive	0.8
	Tox21-Nuclear receptor signalling pathways	Estrogen Receptor Ligand Binding Domain (ER-LBD)	nr_er_lbd	Inactive	1
	Tox21-Nuclear receptor signalling pathways	Peroxisome Proliferator Activated Receptor Gamma (PPAR-Gamma)	nr_ppar_gamma	Inactive	1
	Tox21-Stress response pathways	Nuclear factor (erythroid-derived 2)-like 2/antioxidant responsive element (nrf2/ARE)	sr_are	Inactive	0.99
	Tox21-Stress response pathways	Heat shock factor response element (HSE)	sr_hse	Inactive	0.99
	Tox21-Stress response pathways	Mitochondrial Membrane Potential (MMP)	sr_mmp	Inactive	0.99
	Tox21-Stress response pathways	Phosphoprotein (Tumor Supressor) p53	sr_p53	Inactive	1
	Tox21-Stress response pathways	ATPase family AAA domain-containing protein 5 (ATAD5)	sr_atad5	Inactive	1
	Molecular Initiating Events	Thyroid hormone receptor alpha (THRα)	mie_thr_alpha	Inactive	0.97
	Molecular Initiating Events	Thyroid hormone receptor beta (THRβ)	mie_thr_beta	Inactive	0.78
	Molecular Initiating Events	Transtyretrin (TTR)	mie_ttr	Inactive	0.64
	Molecular Initiating Events	Ryanodine receptor (RYR)	mie_ryr	Inactive	0.97
	Molecular Initiating Events	GABA receptor (GABAR)	mie_gabar	Inactive	0.76
	Molecular Initiating Events	Glutamate N-methyl-D-aspartate receptor (NMDAR)	mie_nmdar	Inactive	0.7
	Molecular Initiating Events	alpha-amino-3-hydroxy-5-methyl-4-isoxazolepropionate receptor (AMPAR)	mie_ampar	Inactive	1
	Molecular Initiating Events	Kainate receptor (KAR)	mie_kar	Inactive	1
	Molecular Initiating Events	Achetylcholinesterase (AChE)	mie_ache	Active	0.58
	Molecular Initiating Events	Constitutive androstane receptor (CAR)	mie_car	Inactive	1
	Molecular Initiating Events	Pregnane X receptor (PXR)	mie_pxr	Inactive	0.84
	Molecular Initiating Events	NADH-quinone oxidoreductase (NADHOX)	mie_nadhox	Inactive	0.87
	Molecular Initiating Events	Voltage gated sodium channel (VGSC)	mie_vgsc	Inactive	0.73
	Molecular Initiating Events	Na+/I- symporter (NIS)	mie_nis	Inactive	0.96
	Metabolism	Cytochrome CYP1A2	CYP1A2	Inactive	0.56
	Metabolism	Cytochrome CYP2C19	CYP2C19	Inactive	0.65
	Metabolism	Cytochrome CYP2C9	CYP2C9	Inactive	0.73
	Metabolism	Cytochrome CYP2D6	CYP2D6	Inactive	0.55
	Metabolism	Cytochrome CYP3A4	CYP3A4	Inactive	0.89
	Metabolism	Cytochrome CYP2E1	CYP2E1	Inactive	0.98
7250 2,4-Xylidine CC1=CC(=C(C=C1)N)C	Organ toxicity	Hepatotoxicity	dili	Inactive	0.67
	Organ toxicity	Neurotoxicity	neuro	Active	0.72
	Organ toxicity	Nephrotoxicity	nephro	Inactive	0.85
	Organ toxicity	Respiratory toxicity	respi	Inactive	1
	Organ toxicity	Cardiotoxicity	cardio	Inactive	0.88
	Toxicity end points	Carcinogenicity	carcino	Active	0.89
	Toxicity end points	Immunotoxicity	immuno	Inactive	0.99
	Toxicity end points	Mutagenicity	mutagen	Active	0.99
	Toxicity end points	Cytotoxicity	cyto	Inactive	0.77
	Toxicity end points	BBB-barrier	bbb	Active	0.96
	Toxicity end points	Ecotoxicity	eco	Active	0.73
	Toxicity end points	Clinical toxicity	clinical	Inactive	0.59
	Toxicity end points	Nutritional toxicity	nutri	Inactive	0.79
	Tox21-Nuclear receptor signalling pathways	Aryl hydrocarbon Receptor (AhR)	nr_ahr	Active	0.78
	Tox21-Nuclear receptor signalling pathways	Androgen Receptor (AR)	nr_ar	Inactive	1
	Tox21-Nuclear receptor signalling pathways	Androgen Receptor Ligand Binding Domain (AR-LBD)	nr_ar_lbd	Inactive	1
	Tox21-Nuclear receptor signalling pathways	Aromatase	nr_aromatase	Inactive	1
	Tox21-Nuclear receptor signalling pathways	Estrogen Receptor Alpha (ER)	nr_er	Active	0.85
	Tox21-Nuclear receptor signalling pathways	Estrogen Receptor Ligand Binding Domain (ER-LBD)	nr_er_lbd	Inactive	1
	Tox21-Nuclear receptor signalling pathways	Peroxisome Proliferator Activated Receptor Gamma (PPAR-Gamma)	nr_ppar_gamma	Inactive	1
	Tox21-Stress response pathways	Nuclear factor (erythroid-derived 2)-like 2/antioxidant responsive element (nrf2/ARE)	sr_are	Inactive	1
	Tox21-Stress response pathways	Heat shock factor response element (HSE)	sr_hse	Inactive	1
	Tox21-Stress response pathways	Mitochondrial Membrane Potential (MMP)	sr_mmp	Inactive	0.99
	Tox21-Stress response pathways	Phosphoprotein (Tumor Supressor) p53	sr_p53	Inactive	1
	Tox21-Stress response pathways	ATPase family AAA domain-containing protein 5 (ATAD5)	sr_atad5	Inactive	1
	Molecular Initiating Events	Thyroid hormone receptor alpha (THRα)	mie_thr_alpha	Inactive	0.97
	Molecular Initiating Events	Thyroid hormone receptor beta (THRβ)	mie_thr_beta	Inactive	0.82
	Molecular Initiating Events	Transtyretrin (TTR)	mie_ttr	Inactive	0.62
	Molecular Initiating Events	Ryanodine receptor (RYR)	mie_ryr	Inactive	0.98
	Molecular Initiating Events	GABA receptor (GABAR)	mie_gabar	Inactive	0.78
	Molecular Initiating Events	Glutamate N-methyl-D-aspartate receptor (NMDAR)	mie_nmdar	Inactive	0.71
	Molecular Initiating Events	alpha-amino-3-hydroxy-5-methyl-4-isoxazolepropionate receptor (AMPAR)	mie_ampar	Inactive	1
	Molecular Initiating Events	Kainate receptor (KAR)	mie_kar	Inactive	1
	Molecular Initiating Events	Achetylcholinesterase (AChE)	mie_ache	Active	0.63
	Molecular Initiating Events	Constitutive androstane receptor (CAR)	mie_car	Inactive	1
	Molecular Initiating Events	Pregnane X receptor (PXR)	mie_pxr	Inactive	0.87
	Molecular Initiating Events	NADH-quinone oxidoreductase (NADHOX)	mie_nadhox	Inactive	0.89
	Molecular Initiating Events	Voltage gated sodium channel (VGSC)	mie_vgsc	Inactive	0.74
	Molecular Initiating Events	Na+/I- symporter (NIS)	mie_nis	Inactive	0.96
	Metabolism	Cytochrome CYP1A2	CYP1A2	Inactive	0.54
	Metabolism	Cytochrome CYP2C19	CYP2C19	Inactive	0.63
	Metabolism	Cytochrome CYP2C9	CYP2C9	Inactive	0.75
	Metabolism	Cytochrome CYP2D6	CYP2D6	Inactive	0.55
	Metabolism	Cytochrome CYP3A4	CYP3A4	Inactive	0.87
	Metabolism	Cytochrome CYP2E1	CYP2E1	Inactive	0.98
6051 P-Phenylazoaniline C1=CC=C(C=C1)N=NC2=CC=C(C=C2)N	Organ toxicity	Hepatotoxicity	dili	Active	0.57
	Organ toxicity	Neurotoxicity	neuro	Active	0.62
	Organ toxicity	Nephrotoxicity	nephro	Inactive	0.86
	Organ toxicity	Respiratory toxicity	respi	Inactive	0.63
	Organ toxicity	Cardiotoxicity	cardio	Inactive	0.76
	Toxicity end points	Carcinogenicity	carcino	Active	0.51
	Toxicity end points	Immunotoxicity	immuno	Inactive	0.99
	Toxicity end points	Mutagenicity	mutagen	Active	0.99
	Toxicity end points	Cytotoxicity	cyto	Inactive	0.78
	Toxicity end points	BBB-barrier	bbb	Active	0.92
	Toxicity end points	Ecotoxicity	eco	Active	0.84
	Toxicity end points	Clinical toxicity	clinical	Inactive	0.62
	Toxicity end points	Nutritional toxicity	nutri	Inactive	0.69
	Tox21-Nuclear receptor signalling pathways	Aryl hydrocarbon Receptor (AhR)	nr_ahr	Active	1
	Tox21-Nuclear receptor signalling pathways	Androgen Receptor (AR)	nr_ar	Inactive	0.98
	Tox21-Nuclear receptor signalling pathways	Androgen Receptor Ligand Binding Domain (AR-LBD)	nr_ar_lbd	Inactive	1
	Tox21-Nuclear receptor signalling pathways	Aromatase	nr_aromatase	Inactive	0.91
	Tox21-Nuclear receptor signalling pathways	Estrogen Receptor Alpha (ER)	nr_er	Active	1
	Tox21-Nuclear receptor signalling pathways	Estrogen Receptor Ligand Binding Domain (ER-LBD)	nr_er_lbd	Inactive	0.98
	Tox21-Nuclear receptor signalling pathways	Peroxisome Proliferator Activated Receptor Gamma (PPAR-Gamma)	nr_ppar_gamma	Inactive	0.91
	Tox21-Stress response pathways	Nuclear factor (erythroid-derived 2)-like 2/antioxidant responsive element (nrf2/ARE)	sr_are	Inactive	0.98
	Tox21-Stress response pathways	Heat shock factor response element (HSE)	sr_hse	Inactive	0.98
	Tox21-Stress response pathways	Mitochondrial Membrane Potential (MMP)	sr_mmp	Active	0.76
	Tox21-Stress response pathways	Phosphoprotein (Tumor Supressor) p53	sr_p53	Inactive	0.97
	Tox21-Stress response pathways	ATPase family AAA domain-containing protein 5 (ATAD5)	sr_atad5	Active	1
	Molecular Initiating Events	Thyroid hormone receptor alpha (THRα)	mie_thr_alpha	Inactive	0.98
	Molecular Initiating Events	Thyroid hormone receptor beta (THRβ)	mie_thr_beta	Inactive	0.83
	Molecular Initiating Events	Transtyretrin (TTR)	mie_ttr	Inactive	0.69
	Molecular Initiating Events	Ryanodine receptor (RYR)	mie_ryr	Inactive	0.99
	Molecular Initiating Events	GABA receptor (GABAR)	mie_gabar	Inactive	0.8
	Molecular Initiating Events	Glutamate N-methyl-D-aspartate receptor (NMDAR)	mie_nmdar	Inactive	0.73
	Molecular Initiating Events	alpha-amino-3-hydroxy-5-methyl-4-isoxazolepropionate receptor (AMPAR)	mie_ampar	Inactive	1
	Molecular Initiating Events	Kainate receptor (KAR)	mie_kar	Inactive	1
	Molecular Initiating Events	Achetylcholinesterase (AChE)	mie_ache	Inactive	0.71
	Molecular Initiating Events	Constitutive androstane receptor (CAR)	mie_car	Inactive	0.99
	Molecular Initiating Events	Pregnane X receptor (PXR)	mie_pxr	Inactive	0.87
	Molecular Initiating Events	NADH-quinone oxidoreductase (NADHOX)	mie_nadhox	Inactive	0.96
	Molecular Initiating Events	Voltage gated sodium channel (VGSC)	mie_vgsc	Inactive	0.57
	Molecular Initiating Events	Na+/I- symporter (NIS)	mie_nis	Inactive	0.92
	Metabolism	Cytochrome CYP1A2	CYP1A2	Inactive	0.57
	Metabolism	Cytochrome CYP2C19	CYP2C19	Inactive	0.66
	Metabolism	Cytochrome CYP2C9	CYP2C9	Inactive	0.62
	Metabolism	Cytochrome CYP2D6	CYP2D6	Active	0.57
	Metabolism	Cytochrome CYP3A4	CYP3A4	Inactive	0.6
	Metabolism	Cytochrome CYP2E1	CYP2E1	Inactive	0.96

## Sheet: ADMETLAB-3.0
ADMETLAB-3.0-Prediction of TOXicity of chemicals
	Toxicity				Environmental toxicity
	Property	Value	Decision	Comment	Property	Value	Comment
7251 4-Chloro-o-toluidine CC1=C(C=CC(=C1)Cl)N	hERG Blockers	0.114	●	■ Molecules with IC50 10M or 50% inhibition at 10 M were classified as hERG+ (Category 1), ■ while molecules with IC50 >10M or < 50% inhibition at 10M were classified as hERG - (Category 0). ■ The output value is the probability of being hERG+, within the range of 0 to 1.	Bioconcentration Factors	0.878	■ Bioconcentration factors are used for considering secondary poisoning potential and assessing risks to human health via the food chain. ■ The unit is log10[(mg/L)/(1000*MW)]
	hERG Blockers (10um)	0.583	●	■ Molecules with IC50 10 M are classified as hERG+ (Category 1), ■ and molecules with IC50 > 10M are classified as hERG- (Category 0). ■ The output value is the probability of being hERG+, within the range of 0 to 1.	IGC50	3.352	■ Tetrahymena pyriformis 50 percent growth inhibition concentration. ■ The unit is log10[(mg/L)/(1000*MW)]
	DILI	0.591	●	■ Drug Induced Liver Injury. ■ Category 1: drugs with a high risk of DILI; ■ Category 0: drugs with no risk of DILI. ■ The output value is the probability of being toxic.	LC50FM	3.855	■ 96-hour fathead minnow 50 percent lethal concentration. ■ The unit is log10[(mg/L)/(1000*MW)]
	AMES Muta genicity	0.673	●	■ AMES Toxicity ■ Category 1: Ames positive(+); ■ Category 0: Ames negative(-); ■ The output value is the probability of being toxic.	LC50DM	5.742	■ 48-hour daphnia magna 50 percent lethal concentration. ■ The unit is log10[(mg/L)/(1000*MW)]
	Rat Oral Acute Toxicity	0.422	●	■ Rat Oral Acute Toxicity. ■ Category 0: low-toxicity, > 500 mg/kg; ■ Category 1: high-toxicity; < 500 mg/kg. ■ The output value is the probability of being toxic, within the range of 0 to 1.
	FDAMDD	0.234	●	■ FDA Maximum (Recommended) Daily Dose. ■ Category 1: FDAMDD (+); ■ Category 0: FDAMDD (-); The output value is the probability of being positive.
	Skin Sensiti zation	0.908	●	■ Category 1: Sensitizer; ■ Category 0: Non-sensitizer. ■ The output value is the probability of being toxic, within the range of 0 to 1.
	Carcinogeni city	0.807	●	■ Category 1: carcinogens; ■ Category 0: non-carcinogens; ■ The output value is the probability of being toxic.
	Eye Corrosion	0.915	●	■ Eye Corrosion ■ Category 1: corrosives; Category 0: noncorrosives; ■ The output value is the probability of being corrosives.
	Eye Irritation	0.994	●	■ Eye Irritation ■ Category 1: irritants; Category 0: nonirritants; ■ The output value is the probability of being irritants.
	Respiratory	0.872	●	■ Category 1: respiratory toxicants; ■ Category 0: non-respiratory toxicants. ■ The output value is the probability of being toxic, within the range of 0 to 1.
	Human Hep atotoxicity	0.436	●	■ Human Hepatotoxicity ■ Category 1: H-HT positive(+); ■ Category 0: H-HT negative(-); ■ The output value is the probability of being toxic.
	Drug-induce d Nephrotox icity	0.549	●	■ Category 0: non-nephrotoxic (-); ■ Category 1: nephrotoxic (+). ■ The output value is the probability of being nephrotoxic (+), within the range of 0 to 1.
	Ototoxicity	0.322	●	■ Category 0: non-ototoxicity (-); ■ Category 1: ototoxicity (+). ■ The output value is the probability of being ototoxicity (+), within the range of 0 to 1.
	Hematotoxic ity	0.557	●	■ Category 0: non-hematotoxicity (-); ■ Category 1: hematotoxicity (+). ■ The output value is the probability of being hematotoxicity (+), within the range of 0 to 1.
	Genotoxicity	0.931	●	■ Category 0: non-Genotoxicity (-); ■ Category 1: Genotoxicity (+). ■ The output value is the probability of being ototoxicity (+), within the range of 0 to 1.
	RPMI-8226 Immunitoxici ty	0.046	●	■ Category 0: non-cytotoxicity (-); ■ Category 1: cytotoxicity (+). ■ The output value is the probability of being ototoxicity (+), within the range of 0 to 1.
	A549 Cytotoxicity	0.051	●	■ Category 0: non-cytotoxicity (-); ■ Category 1: cytotoxicity (+). ■ The output value is the probability of being ototoxicity (+), within the range of 0 to 1.
	Hek293 Cytotoxicity	0.323	●	■ Category 0: non-cytotoxicity (-); ■ Category 1: cytotoxicity (+). ■ The output value is the probability of being ototoxicity (+), within the range of 0 to 1.
	Drug-induce d Neurotoxi city	0.961	●	■ Category 0: non-neurotoxic (-); ■ Category 1: neurotoxic (+). ■ The output value is the probability of being neurotoxic (+), within the range of 0 to 1.
7340 O-AMINOAZOTOLUENE CC1=CC=CC=C1N=NC2=CC(=C(C=C2)N)C	hERG Blockers	0.059	●	■ Molecules with IC50 10M or 50% inhibition at 10 M were classified as hERG+ (Category 1), ■ while molecules with IC50 >10M or < 50% inhibition at 10M were classified as hERG - (Category 0). ■ The output value is the probability of being hERG+, within the range of 0 to 1.	Bioconcentration Factors	1.194	■ Bioconcentration factors are used for considering secondary poisoning potential and assessing risks to human health via the food chain. ■ The unit is log10[(mg/L)/(1000*MW)]
	hERG Blockers (10um)	0.599	●	■ Molecules with IC50 10 M are classified as hERG+ (Category 1), ■ and molecules with IC50 > 10M are classified as hERG- (Category 0). ■ The output value is the probability of being hERG+, within the range of 0 to 1.	IGC50	3.956	■ Tetrahymena pyriformis 50 percent growth inhibition concentration. ■ The unit is log10[(mg/L)/(1000*MW)]
	DILI	0.396	●	■ Drug Induced Liver Injury. ■ Category 1: drugs with a high risk of DILI; ■ Category 0: drugs with no risk of DILI. ■ The output value is the probability of being toxic.	LC50FM	4.6	■ 96-hour fathead minnow 50 percent lethal concentration. ■ The unit is log10[(mg/L)/(1000*MW)]
	AMES Muta genicity	0.954	●	■ AMES Toxicity ■ Category 1: Ames positive(+); ■ Category 0: Ames negative(-); ■ The output value is the probability of being toxic.	LC50DM	4.837	■ 48-hour daphnia magna 50 percent lethal concentration. ■ The unit is log10[(mg/L)/(1000*MW)]
	Rat Oral Acute Toxicity	0.436	●	■ Rat Oral Acute Toxicity. ■ Category 0: low-toxicity, > 500 mg/kg; ■ Category 1: high-toxicity; < 500 mg/kg. ■ The output value is the probability of being toxic, within the range of 0 to 1.
	FDAMDD	0.339	●	■ FDA Maximum (Recommended) Daily Dose. ■ Category 1: FDAMDD (+); ■ Category 0: FDAMDD (-); The output value is the probability of being positive.
	Skin Sensiti zation	0.959	●	■ Category 1: Sensitizer; ■ Category 0: Non-sensitizer. ■ The output value is the probability of being toxic, within the range of 0 to 1.
	Carcinogeni city	0.948	●	■ Category 1: carcinogens; ■ Category 0: non-carcinogens; ■ The output value is the probability of being toxic.
	Eye Corrosion	0.229	●	■ Eye Corrosion ■ Category 1: corrosives; Category 0: noncorrosives; ■ The output value is the probability of being corrosives.
	Eye Irritation	0.989	●	■ Eye Irritation ■ Category 1: irritants; Category 0: nonirritants; ■ The output value is the probability of being irritants.
	Respiratory	0.902	●	■ Category 1: respiratory toxicants; ■ Category 0: non-respiratory toxicants. ■ The output value is the probability of being toxic, within the range of 0 to 1.
	Human Hep atotoxicity	0.539	●	■ Human Hepatotoxicity ■ Category 1: H-HT positive(+); ■ Category 0: H-HT negative(-); ■ The output value is the probability of being toxic.
	Drug-induce d Nephrotox icity	0.565	●	■ Category 0: non-nephrotoxic (-); ■ Category 1: nephrotoxic (+). ■ The output value is the probability of being nephrotoxic (+), within the range of 0 to 1.
	Ototoxicity	0.3	●	■ Category 0: non-ototoxicity (-); ■ Category 1: ototoxicity (+). ■ The output value is the probability of being ototoxicity (+), within the range of 0 to 1.
	Hematotoxic ity	0.806	●	■ Category 0: non-hematotoxicity (-); ■ Category 1: hematotoxicity (+). ■ The output value is the probability of being hematotoxicity (+), within the range of 0 to 1.
	Genotoxicity	0.999	●	■ Category 0: non-Genotoxicity (-); ■ Category 1: Genotoxicity (+). ■ The output value is the probability of being ototoxicity (+), within the range of 0 to 1.
	RPMI-8226 Immunitoxici ty	0.032	●	■ Category 0: non-cytotoxicity (-); ■ Category 1: cytotoxicity (+). ■ The output value is the probability of being ototoxicity (+), within the range of 0 to 1.
	A549 Cytotoxicity	0.024	●	■ Category 0: non-cytotoxicity (-); ■ Category 1: cytotoxicity (+). ■ The output value is the probability of being ototoxicity (+), within the range of 0 to 1.
	Hek293 Cytotoxicity	0.46	●	■ Category 0: non-cytotoxicity (-); ■ Category 1: cytotoxicity (+). ■ The output value is the probability of being ototoxicity (+), within the range of 0 to 1.
	Drug-induce d Neurotoxi city	0.991	●	■ Category 0: non-neurotoxic (-); ■ Category 1: neurotoxic (+). ■ The output value is the probability of being neurotoxic (+), within the range of 0 to 1.
7444 2-Amino-4-nitrotoluene CC1=C(C=C(C=C1)[N+](=O)[O-])N	hERG Blockers	0.094	●	■ Molecules with IC50 10M or 50% inhibition at 10 M were classified as hERG+ (Category 1), ■ while molecules with IC50 >10M or < 50% inhibition at 10M were classified as hERG - (Category 0). ■ The output value is the probability of being hERG+, within the range of 0 to 1.	Bioconcentration Factors	0.591	■ Bioconcentration factors are used for considering secondary poisoning potential and assessing risks to human health via the food chain. ■ The unit is log10[(mg/L)/(1000*MW)]
	hERG Blockers (10um)	0.518	●	■ Molecules with IC50 10 M are classified as hERG+ (Category 1), ■ and molecules with IC50 > 10M are classified as hERG- (Category 0). ■ The output value is the probability of being hERG+, within the range of 0 to 1.	IGC50	3.247	■ Tetrahymena pyriformis 50 percent growth inhibition concentration. ■ The unit is log10[(mg/L)/(1000*MW)]
	DILI	0.909	●	■ Drug Induced Liver Injury. ■ Category 1: drugs with a high risk of DILI; ■ Category 0: drugs with no risk of DILI. ■ The output value is the probability of being toxic.	LC50FM	3.356	■ 96-hour fathead minnow 50 percent lethal concentration. ■ The unit is log10[(mg/L)/(1000*MW)]
	AMES Muta genicity	0.947	●	■ AMES Toxicity ■ Category 1: Ames positive(+); ■ Category 0: Ames negative(-); ■ The output value is the probability of being toxic.	LC50DM	4.424	■ 48-hour daphnia magna 50 percent lethal concentration. ■ The unit is log10[(mg/L)/(1000*MW)]
	Rat Oral Acute Toxicity	0.513	●	■ Rat Oral Acute Toxicity. ■ Category 0: low-toxicity, > 500 mg/kg; ■ Category 1: high-toxicity; < 500 mg/kg. ■ The output value is the probability of being toxic, within the range of 0 to 1.
	FDAMDD	0.278	●	■ FDA Maximum (Recommended) Daily Dose. ■ Category 1: FDAMDD (+); ■ Category 0: FDAMDD (-); The output value is the probability of being positive.
	Skin Sensiti zation	0.962	●	■ Category 1: Sensitizer; ■ Category 0: Non-sensitizer. ■ The output value is the probability of being toxic, within the range of 0 to 1.
	Carcinogeni city	0.782	●	■ Category 1: carcinogens; ■ Category 0: non-carcinogens; ■ The output value is the probability of being toxic.
	Eye Corrosion	0.912	●	■ Eye Corrosion ■ Category 1: corrosives; Category 0: noncorrosives; ■ The output value is the probability of being corrosives.
	Eye Irritation	0.998	●	■ Eye Irritation ■ Category 1: irritants; Category 0: nonirritants; ■ The output value is the probability of being irritants.
	Respiratory	0.885	●	■ Category 1: respiratory toxicants; ■ Category 0: non-respiratory toxicants. ■ The output value is the probability of being toxic, within the range of 0 to 1.
	Human Hep atotoxicity	0.497	●	■ Human Hepatotoxicity ■ Category 1: H-HT positive(+); ■ Category 0: H-HT negative(-); ■ The output value is the probability of being toxic.
	Drug-induce d Nephrotox icity	0.236	●	■ Category 0: non-nephrotoxic (-); ■ Category 1: nephrotoxic (+). ■ The output value is the probability of being nephrotoxic (+), within the range of 0 to 1.
	Ototoxicity	0.199	●	■ Category 0: non-ototoxicity (-); ■ Category 1: ototoxicity (+). ■ The output value is the probability of being ototoxicity (+), within the range of 0 to 1.
	Hematotoxic ity	0.614	●	■ Category 0: non-hematotoxicity (-); ■ Category 1: hematotoxicity (+). ■ The output value is the probability of being hematotoxicity (+), within the range of 0 to 1.
	Genotoxicity	1	●	■ Category 0: non-Genotoxicity (-); ■ Category 1: Genotoxicity (+). ■ The output value is the probability of being ototoxicity (+), within the range of 0 to 1.
	RPMI-8226 Immunitoxici ty	0.051	●	■ Category 0: non-cytotoxicity (-); ■ Category 1: cytotoxicity (+). ■ The output value is the probability of being ototoxicity (+), within the range of 0 to 1.
	A549 Cytotoxicity	0.074	●	■ Category 0: non-cytotoxicity (-); ■ Category 1: cytotoxicity (+). ■ The output value is the probability of being ototoxicity (+), within the range of 0 to 1.
	Hek293 Cytotoxicity	0.285	●	■ Category 0: non-cytotoxicity (-); ■ Category 1: cytotoxicity (+). ■ The output value is the probability of being ototoxicity (+), within the range of 0 to 1.
	Drug-induce d Neurotoxi city	0.282	●	■ Category 0: non-neurotoxic (-); ■ Category 1: neurotoxic (+). ■ The output value is the probability of being neurotoxic (+), within the range of 0 to 1.
13283 4,4'-Methylene-bis(2-methylaniline) CC1=C(C=CC(=C1)CC2=CC(=C(C=C2)N)C)N	hERG Blockers	0.162	●	■ Molecules with IC50 10M or 50% inhibition at 10 M were classified as hERG+ (Category 1), ■ while molecules with IC50 >10M or < 50% inhibition at 10M were classified as hERG - (Category 0). ■ The output value is the probability of being hERG+, within the range of 0 to 1.	Bioconcentration Factors	1.586	■ Bioconcentration factors are used for considering secondary poisoning potential and assessing risks to human health via the food chain. ■ The unit is log10[(mg/L)/(1000*MW)]
	hERG Blockers (10um)	0.644	●	■ Molecules with IC50 10 M are classified as hERG+ (Category 1), ■ and molecules with IC50 > 10M are classified as hERG- (Category 0). ■ The output value is the probability of being hERG+, within the range of 0 to 1.	IGC50	3.894	■ Tetrahymena pyriformis 50 percent growth inhibition concentration. ■ The unit is log10[(mg/L)/(1000*MW)]
	DILI	0.749	●	■ Drug Induced Liver Injury. ■ Category 1: drugs with a high risk of DILI; ■ Category 0: drugs with no risk of DILI. ■ The output value is the probability of being toxic.	LC50FM	4.346	■ 96-hour fathead minnow 50 percent lethal concentration. ■ The unit is log10[(mg/L)/(1000*MW)]
	AMES Muta genicity	0.933	●	■ AMES Toxicity ■ Category 1: Ames positive(+); ■ Category 0: Ames negative(-); ■ The output value is the probability of being toxic.	LC50DM	4.976	■ 48-hour daphnia magna 50 percent lethal concentration. ■ The unit is log10[(mg/L)/(1000*MW)]
	Rat Oral Acute Toxicity	0.132	●	■ Rat Oral Acute Toxicity. ■ Category 0: low-toxicity, > 500 mg/kg; ■ Category 1: high-toxicity; < 500 mg/kg. ■ The output value is the probability of being toxic, within the range of 0 to 1.
	FDAMDD	0.378	●	■ FDA Maximum (Recommended) Daily Dose. ■ Category 1: FDAMDD (+); ■ Category 0: FDAMDD (-); The output value is the probability of being positive.
	Skin Sensiti zation	0.968	●	■ Category 1: Sensitizer; ■ Category 0: Non-sensitizer. ■ The output value is the probability of being toxic, within the range of 0 to 1.
	Carcinogeni city	0.855	●	■ Category 1: carcinogens; ■ Category 0: non-carcinogens; ■ The output value is the probability of being toxic.
	Eye Corrosion	0.472	●	■ Eye Corrosion ■ Category 1: corrosives; Category 0: noncorrosives; ■ The output value is the probability of being corrosives.
	Eye Irritation	0.994	●	■ Eye Irritation ■ Category 1: irritants; Category 0: nonirritants; ■ The output value is the probability of being irritants.
	Respiratory	0.795	●	■ Category 1: respiratory toxicants; ■ Category 0: non-respiratory toxicants. ■ The output value is the probability of being toxic, within the range of 0 to 1.
	Human Hep atotoxicity	0.635	●	■ Human Hepatotoxicity ■ Category 1: H-HT positive(+); ■ Category 0: H-HT negative(-); ■ The output value is the probability of being toxic.
	Drug-induce d Nephrotox icity	0.565	●	■ Category 0: non-nephrotoxic (-); ■ Category 1: nephrotoxic (+). ■ The output value is the probability of being nephrotoxic (+), within the range of 0 to 1.
	Ototoxicity	0.418	●	■ Category 0: non-ototoxicity (-); ■ Category 1: ototoxicity (+). ■ The output value is the probability of being ototoxicity (+), within the range of 0 to 1.
	Hematotoxic ity	0.598	●	■ Category 0: non-hematotoxicity (-); ■ Category 1: hematotoxicity (+). ■ The output value is the probability of being hematotoxicity (+), within the range of 0 to 1.
	Genotoxicity	0.993	●	■ Category 0: non-Genotoxicity (-); ■ Category 1: Genotoxicity (+). ■ The output value is the probability of being ototoxicity (+), within the range of 0 to 1.
	RPMI-8226 Immunitoxici ty	0.084	●	■ Category 0: non-cytotoxicity (-); ■ Category 1: cytotoxicity (+). ■ The output value is the probability of being ototoxicity (+), within the range of 0 to 1.
	A549 Cytotoxicity	0.06	●	■ Category 0: non-cytotoxicity (-); ■ Category 1: cytotoxicity (+). ■ The output value is the probability of being ototoxicity (+), within the range of 0 to 1.
	Hek293 Cytotoxicity	0.543	●	■ Category 0: non-cytotoxicity (-); ■ Category 1: cytotoxicity (+). ■ The output value is the probability of being ototoxicity (+), within the range of 0 to 1.
	Drug-induce d Neurotoxi city	0.989	●	■ Category 0: non-neurotoxic (-); ■ Category 1: neurotoxic (+). ■ The output value is the probability of being neurotoxic (+), within the range of 0 to 1.
8445 p-Cresidine CC1=CC(=C(C=C1)OC)N	hERG Blockers	0.091	●	■ Molecules with IC50 10M or 50% inhibition at 10 M were classified as hERG+ (Category 1), ■ while molecules with IC50 >10M or < 50% inhibition at 10M were classified as hERG - (Category 0). ■ The output value is the probability of being hERG+, within the range of 0 to 1.	Bioconcentration Factors	0.828	■ Bioconcentration factors are used for considering secondary poisoning potential and assessing risks to human health via the food chain. ■ The unit is log10[(mg/L)/(1000*MW)]
	hERG Blockers (10um)	0.488	●	■ Molecules with IC50 10 M are classified as hERG+ (Category 1), ■ and molecules with IC50 > 10M are classified as hERG- (Category 0). ■ The output value is the probability of being hERG+, within the range of 0 to 1.	IGC50	2.599	■ Tetrahymena pyriformis 50 percent growth inhibition concentration. ■ The unit is log10[(mg/L)/(1000*MW)]
	DILI	0.412	●	■ Drug Induced Liver Injury. ■ Category 1: drugs with a high risk of DILI; ■ Category 0: drugs with no risk of DILI. ■ The output value is the probability of being toxic.	LC50FM	3.065	■ 96-hour fathead minnow 50 percent lethal concentration. ■ The unit is log10[(mg/L)/(1000*MW)]
	AMES Muta genicity	0.755	●	■ AMES Toxicity ■ Category 1: Ames positive(+); ■ Category 0: Ames negative(-); ■ The output value is the probability of being toxic.	LC50DM	4.199	■ 48-hour daphnia magna 50 percent lethal concentration. ■ The unit is log10[(mg/L)/(1000*MW)]
	Rat Oral Acute Toxicity	0.313	●	■ Rat Oral Acute Toxicity. ■ Category 0: low-toxicity, > 500 mg/kg; ■ Category 1: high-toxicity; < 500 mg/kg. ■ The output value is the probability of being toxic, within the range of 0 to 1.
	FDAMDD	0.223	●	■ FDA Maximum (Recommended) Daily Dose. ■ Category 1: FDAMDD (+); ■ Category 0: FDAMDD (-); The output value is the probability of being positive.
	Skin Sensiti zation	0.874	●	■ Category 1: Sensitizer; ■ Category 0: Non-sensitizer. ■ The output value is the probability of being toxic, within the range of 0 to 1.
	Carcinogeni city	0.813	●	■ Category 1: carcinogens; ■ Category 0: non-carcinogens; ■ The output value is the probability of being toxic.
	Eye Corrosion	0.915	●	■ Eye Corrosion ■ Category 1: corrosives; Category 0: noncorrosives; ■ The output value is the probability of being corrosives.
	Eye Irritation	0.997	●	■ Eye Irritation ■ Category 1: irritants; Category 0: nonirritants; ■ The output value is the probability of being irritants.
	Respiratory	0.874	●	■ Category 1: respiratory toxicants; ■ Category 0: non-respiratory toxicants. ■ The output value is the probability of being toxic, within the range of 0 to 1.
	Human Hep atotoxicity	0.375	●	■ Human Hepatotoxicity ■ Category 1: H-HT positive(+); ■ Category 0: H-HT negative(-); ■ The output value is the probability of being toxic.
	Drug-induce d Nephrotox icity	0.338	●	■ Category 0: non-nephrotoxic (-); ■ Category 1: nephrotoxic (+). ■ The output value is the probability of being nephrotoxic (+), within the range of 0 to 1.
	Ototoxicity	0.237	●	■ Category 0: non-ototoxicity (-); ■ Category 1: ototoxicity (+). ■ The output value is the probability of being ototoxicity (+), within the range of 0 to 1.
	Hematotoxic ity	0.452	●	■ Category 0: non-hematotoxicity (-); ■ Category 1: hematotoxicity (+). ■ The output value is the probability of being hematotoxicity (+), within the range of 0 to 1.
	Genotoxicity	0.863	●	■ Category 0: non-Genotoxicity (-); ■ Category 1: Genotoxicity (+). ■ The output value is the probability of being ototoxicity (+), within the range of 0 to 1.
	RPMI-8226 Immunitoxici ty	0.061	●	■ Category 0: non-cytotoxicity (-); ■ Category 1: cytotoxicity (+). ■ The output value is the probability of being ototoxicity (+), within the range of 0 to 1.
	A549 Cytotoxicity	0.019	●	■ Category 0: non-cytotoxicity (-); ■ Category 1: cytotoxicity (+). ■ The output value is the probability of being ototoxicity (+), within the range of 0 to 1.
	Hek293 Cytotoxicity	0.155	●	■ Category 0: non-cytotoxicity (-); ■ Category 1: cytotoxicity (+). ■ The output value is the probability of being ototoxicity (+), within the range of 0 to 1.
	Drug-induce d Neurotoxi city	0.951	●	■ Category 0: non-neurotoxic (-); ■ Category 1: neurotoxic (+). ■ The output value is the probability of being neurotoxic (+), within the range of 0 to 1.
8765 4,4,-Thiodianiline C1=CC(=CC=C1N)SC2=CC=C(C=C2)N	hERG Blockers	0.151	●	■ Molecules with IC50 10M or 50% inhibition at 10 M were classified as hERG+ (Category 1), ■ while molecules with IC50 >10M or < 50% inhibition at 10M were classified as hERG - (Category 0). ■ The output value is the probability of being hERG+, within the range of 0 to 1.	Bioconcentration Factors	1.265	■ Bioconcentration factors are used for considering secondary poisoning potential and assessing risks to human health via the food chain. ■ The unit is log10[(mg/L)/(1000*MW)]
	hERG Blockers (10um)	0.756	●	■ Molecules with IC50 10 M are classified as hERG+ (Category 1), ■ and molecules with IC50 > 10M are classified as hERG- (Category 0). ■ The output value is the probability of being hERG+, within the range of 0 to 1.	IGC50	3.56	■ Tetrahymena pyriformis 50 percent growth inhibition concentration. ■ The unit is log10[(mg/L)/(1000*MW)]
	DILI	1	●	■ Drug Induced Liver Injury. ■ Category 1: drugs with a high risk of DILI; ■ Category 0: drugs with no risk of DILI. ■ The output value is the probability of being toxic.	LC50FM	3.974	■ 96-hour fathead minnow 50 percent lethal concentration. ■ The unit is log10[(mg/L)/(1000*MW)]
	AMES Muta genicity	0.982	●	■ AMES Toxicity ■ Category 1: Ames positive(+); ■ Category 0: Ames negative(-); ■ The output value is the probability of being toxic.	LC50DM	5.09	■ 48-hour daphnia magna 50 percent lethal concentration. ■ The unit is log10[(mg/L)/(1000*MW)]
	Rat Oral Acute Toxicity	0.267	●	■ Rat Oral Acute Toxicity. ■ Category 0: low-toxicity, > 500 mg/kg; ■ Category 1: high-toxicity; < 500 mg/kg. ■ The output value is the probability of being toxic, within the range of 0 to 1.
	FDAMDD	0.075	●	■ FDA Maximum (Recommended) Daily Dose. ■ Category 1: FDAMDD (+); ■ Category 0: FDAMDD (-); The output value is the probability of being positive.
	Skin Sensiti zation	0.992	●	■ Category 1: Sensitizer; ■ Category 0: Non-sensitizer. ■ The output value is the probability of being toxic, within the range of 0 to 1.
	Carcinogeni city	0.956	●	■ Category 1: carcinogens; ■ Category 0: non-carcinogens; ■ The output value is the probability of being toxic.
	Eye Corrosion	0.025	●	■ Eye Corrosion ■ Category 1: corrosives; Category 0: noncorrosives; ■ The output value is the probability of being corrosives.
	Eye Irritation	0.993	●	■ Eye Irritation ■ Category 1: irritants; Category 0: nonirritants; ■ The output value is the probability of being irritants.
	Respiratory	0.999	●	■ Category 1: respiratory toxicants; ■ Category 0: non-respiratory toxicants. ■ The output value is the probability of being toxic, within the range of 0 to 1.
	Human Hep atotoxicity	0.705	●	■ Human Hepatotoxicity ■ Category 1: H-HT positive(+); ■ Category 0: H-HT negative(-); ■ The output value is the probability of being toxic.
	Drug-induce d Nephrotox icity	0.775	●	■ Category 0: non-nephrotoxic (-); ■ Category 1: nephrotoxic (+). ■ The output value is the probability of being nephrotoxic (+), within the range of 0 to 1.
	Ototoxicity	0.41	●	■ Category 0: non-ototoxicity (-); ■ Category 1: ototoxicity (+). ■ The output value is the probability of being ototoxicity (+), within the range of 0 to 1.
	Hematotoxic ity	0.849	●	■ Category 0: non-hematotoxicity (-); ■ Category 1: hematotoxicity (+). ■ The output value is the probability of being hematotoxicity (+), within the range of 0 to 1.
	Genotoxicity	0.949	●	■ Category 0: non-Genotoxicity (-); ■ Category 1: Genotoxicity (+). ■ The output value is the probability of being ototoxicity (+), within the range of 0 to 1.
	RPMI-8226 Immunitoxici ty	0.122	●	■ Category 0: non-cytotoxicity (-); ■ Category 1: cytotoxicity (+). ■ The output value is the probability of being ototoxicity (+), within the range of 0 to 1.
	A549 Cytotoxicity	0.534	●	■ Category 0: non-cytotoxicity (-); ■ Category 1: cytotoxicity (+). ■ The output value is the probability of being ototoxicity (+), within the range of 0 to 1.
	Hek293 Cytotoxicity	0.88	●	■ Category 0: non-cytotoxicity (-); ■ Category 1: cytotoxicity (+). ■ The output value is the probability of being ototoxicity (+), within the range of 0 to 1.
	Drug-induce d Neurotoxi city	0.996	●	■ Category 0: non-neurotoxic (-); ■ Category 1: neurotoxic (+). ■ The output value is the probability of being neurotoxic (+), within the range of 0 to 1.
7242 o-Toluidine CC1=CC=CC=C1N	hERG Blockers	0.059	●	■ Molecules with IC50 10M or 50% inhibition at 10 M were classified as hERG+ (Category 1), ■ while molecules with IC50 >10M or < 50% inhibition at 10M were classified as hERG - (Category 0). ■ The output value is the probability of being hERG+, within the range of 0 to 1.	Bioconcentration Factors	0.636	■ Bioconcentration factors are used for considering secondary poisoning potential and assessing risks to human health via the food chain. ■ The unit is log10[(mg/L)/(1000*MW)]
	hERG Blockers (10um)	0.447	●	■ Molecules with IC50 10 M are classified as hERG+ (Category 1), ■ and molecules with IC50 > 10M are classified as hERG- (Category 0). ■ The output value is the probability of being hERG+, within the range of 0 to 1.	IGC50	2.829	■ Tetrahymena pyriformis 50 percent growth inhibition concentration. ■ The unit is log10[(mg/L)/(1000*MW)]
	DILI	0.413	●	■ Drug Induced Liver Injury. ■ Category 1: drugs with a high risk of DILI; ■ Category 0: drugs with no risk of DILI. ■ The output value is the probability of being toxic.	LC50FM	3.055	■ 96-hour fathead minnow 50 percent lethal concentration. ■ The unit is log10[(mg/L)/(1000*MW)]
	AMES Muta genicity	0.788	●	■ AMES Toxicity ■ Category 1: Ames positive(+); ■ Category 0: Ames negative(-); ■ The output value is the probability of being toxic.	LC50DM	5.441	■ 48-hour daphnia magna 50 percent lethal concentration. ■ The unit is log10[(mg/L)/(1000*MW)]
	Rat Oral Acute Toxicity	0.417	●	■ Rat Oral Acute Toxicity. ■ Category 0: low-toxicity, > 500 mg/kg; ■ Category 1: high-toxicity; < 500 mg/kg. ■ The output value is the probability of being toxic, within the range of 0 to 1.
	FDAMDD	0.206	●	■ FDA Maximum (Recommended) Daily Dose. ■ Category 1: FDAMDD (+); ■ Category 0: FDAMDD (-); The output value is the probability of being positive.
	Skin Sensiti zation	0.904	●	■ Category 1: Sensitizer; ■ Category 0: Non-sensitizer. ■ The output value is the probability of being toxic, within the range of 0 to 1.
	Carcinogeni city	0.828	●	■ Category 1: carcinogens; ■ Category 0: non-carcinogens; ■ The output value is the probability of being toxic.
	Eye Corrosion	0.941	●	■ Eye Corrosion ■ Category 1: corrosives; Category 0: noncorrosives; ■ The output value is the probability of being corrosives.
	Eye Irritation	0.998	●	■ Eye Irritation ■ Category 1: irritants; Category 0: nonirritants; ■ The output value is the probability of being irritants.
	Respiratory	0.917	●	■ Category 1: respiratory toxicants; ■ Category 0: non-respiratory toxicants. ■ The output value is the probability of being toxic, within the range of 0 to 1.
	Human Hep atotoxicity	0.431	●	■ Human Hepatotoxicity ■ Category 1: H-HT positive(+); ■ Category 0: H-HT negative(-); ■ The output value is the probability of being toxic.
	Drug-induce d Nephrotox icity	0.37	●	■ Category 0: non-nephrotoxic (-); ■ Category 1: nephrotoxic (+). ■ The output value is the probability of being nephrotoxic (+), within the range of 0 to 1.
	Ototoxicity	0.265	●	■ Category 0: non-ototoxicity (-); ■ Category 1: ototoxicity (+). ■ The output value is the probability of being ototoxicity (+), within the range of 0 to 1.
	Hematotoxic ity	0.514	●	■ Category 0: non-hematotoxicity (-); ■ Category 1: hematotoxicity (+). ■ The output value is the probability of being hematotoxicity (+), within the range of 0 to 1.
	Genotoxicity	0.94	●	■ Category 0: non-Genotoxicity (-); ■ Category 1: Genotoxicity (+). ■ The output value is the probability of being ototoxicity (+), within the range of 0 to 1.
	RPMI-8226 Immunitoxici ty	0.047	●	■ Category 0: non-cytotoxicity (-); ■ Category 1: cytotoxicity (+). ■ The output value is the probability of being ototoxicity (+), within the range of 0 to 1.
	A549 Cytotoxicity	0.019	●	■ Category 0: non-cytotoxicity (-); ■ Category 1: cytotoxicity (+). ■ The output value is the probability of being ototoxicity (+), within the range of 0 to 1.
	Hek293 Cytotoxicity	0.164	●	■ Category 0: non-cytotoxicity (-); ■ Category 1: cytotoxicity (+). ■ The output value is the probability of being ototoxicity (+), within the range of 0 to 1.
	Drug-induce d Neurotoxi city	0.954	●	■ Category 0: non-neurotoxic (-); ■ Category 1: neurotoxic (+). ■ The output value is the probability of being neurotoxic (+), within the range of 0 to 1.
8717 2,4,5-Trimethylaniline CC1=CC(=C(C=C1C)N)C	hERG Blockers	0.076	●	■ Molecules with IC50 10M or 50% inhibition at 10 M were classified as hERG+ (Category 1), ■ while molecules with IC50 >10M or < 50% inhibition at 10M were classified as hERG - (Category 0). ■ The output value is the probability of being hERG+, within the range of 0 to 1.	Bioconcentration Factors	0.872	■ Bioconcentration factors are used for considering secondary poisoning potential and assessing risks to human health via the food chain. ■ The unit is log10[(mg/L)/(1000*MW)]
	hERG Blockers (10um)	0.47	●	■ Molecules with IC50 10 M are classified as hERG+ (Category 1), ■ and molecules with IC50 > 10M are classified as hERG- (Category 0). ■ The output value is the probability of being hERG+, within the range of 0 to 1.	IGC50	2.932	■ Tetrahymena pyriformis 50 percent growth inhibition concentration. ■ The unit is log10[(mg/L)/(1000*MW)]
	DILI	0.329	●	■ Drug Induced Liver Injury. ■ Category 1: drugs with a high risk of DILI; ■ Category 0: drugs with no risk of DILI. ■ The output value is the probability of being toxic.	LC50FM	3.457	■ 96-hour fathead minnow 50 percent lethal concentration. ■ The unit is log10[(mg/L)/(1000*MW)]
	AMES Muta genicity	0.764	●	■ AMES Toxicity ■ Category 1: Ames positive(+); ■ Category 0: Ames negative(-); ■ The output value is the probability of being toxic.	LC50DM	4.606	■ 48-hour daphnia magna 50 percent lethal concentration. ■ The unit is log10[(mg/L)/(1000*MW)]
	Rat Oral Acute Toxicity	0.381	●	■ Rat Oral Acute Toxicity. ■ Category 0: low-toxicity, > 500 mg/kg; ■ Category 1: high-toxicity; < 500 mg/kg. ■ The output value is the probability of being toxic, within the range of 0 to 1.
	FDAMDD	0.226	●	■ FDA Maximum (Recommended) Daily Dose. ■ Category 1: FDAMDD (+); ■ Category 0: FDAMDD (-); The output value is the probability of being positive.
	Skin Sensiti zation	0.87	●	■ Category 1: Sensitizer; ■ Category 0: Non-sensitizer. ■ The output value is the probability of being toxic, within the range of 0 to 1.
	Carcinogeni city	0.818	●	■ Category 1: carcinogens; ■ Category 0: non-carcinogens; ■ The output value is the probability of being toxic.
	Eye Corrosion	0.948	●	■ Eye Corrosion ■ Category 1: corrosives; Category 0: noncorrosives; ■ The output value is the probability of being corrosives.
	Eye Irritation	0.997	●	■ Eye Irritation ■ Category 1: irritants; Category 0: nonirritants; ■ The output value is the probability of being irritants.
	Respiratory	0.9	●	■ Category 1: respiratory toxicants; ■ Category 0: non-respiratory toxicants. ■ The output value is the probability of being toxic, within the range of 0 to 1.
	Human Hep atotoxicity	0.44	●	■ Human Hepatotoxicity ■ Category 1: H-HT positive(+); ■ Category 0: H-HT negative(-); ■ The output value is the probability of being toxic.
	Drug-induce d Nephrotox icity	0.339	●	■ Category 0: non-nephrotoxic (-); ■ Category 1: nephrotoxic (+). ■ The output value is the probability of being nephrotoxic (+), within the range of 0 to 1.
	Ototoxicity	0.294	●	■ Category 0: non-ototoxicity (-); ■ Category 1: ototoxicity (+). ■ The output value is the probability of being ototoxicity (+), within the range of 0 to 1.
	Hematotoxic ity	0.543	●	■ Category 0: non-hematotoxicity (-); ■ Category 1: hematotoxicity (+). ■ The output value is the probability of being hematotoxicity (+), within the range of 0 to 1.
	Genotoxicity	0.888	●	■ Category 0: non-Genotoxicity (-); ■ Category 1: Genotoxicity (+). ■ The output value is the probability of being ototoxicity (+), within the range of 0 to 1.
	RPMI-8226 Immunitoxici ty	0.059	●	■ Category 0: non-cytotoxicity (-); ■ Category 1: cytotoxicity (+). ■ The output value is the probability of being ototoxicity (+), within the range of 0 to 1.
	A549 Cytotoxicity	0.025	●	■ Category 0: non-cytotoxicity (-); ■ Category 1: cytotoxicity (+). ■ The output value is the probability of being ototoxicity (+), within the range of 0 to 1.
	Hek293 Cytotoxicity	0.121	●	■ Category 0: non-cytotoxicity (-); ■ Category 1: cytotoxicity (+). ■ The output value is the probability of being ototoxicity (+), within the range of 0 to 1.
	Drug-induce d Neurotoxi city	0.937	●	■ Category 0: non-neurotoxic (-); ■ Category 1: neurotoxic (+). ■ The output value is the probability of being neurotoxic (+), within the range of 0 to 1.
7250 2,4-Xylidine CC1=CC(=C(C=C1)N)C	hERG Blockers	0.065	●	■ Molecules with IC50 10M or 50% inhibition at 10 M were classified as hERG+ (Category 1), ■ while molecules with IC50 >10M or < 50% inhibition at 10M were classified as hERG - (Category 0). ■ The output value is the probability of being hERG+, within the range of 0 to 1.	Bioconcentration Factors	0.703	■ Bioconcentration factors are used for considering secondary poisoning potential and assessing risks to human health via the food chain. ■ The unit is log10[(mg/L)/(1000*MW)]
	hERG Blockers (10um)	0.466	●	■ Molecules with IC50 10 M are classified as hERG+ (Category 1), ■ and molecules with IC50 > 10M are classified as hERG- (Category 0). ■ The output value is the probability of being hERG+, within the range of 0 to 1.	IGC50	2.749	■ Tetrahymena pyriformis 50 percent growth inhibition concentration. ■ The unit is log10[(mg/L)/(1000*MW)]
	DILI	0.367	●	■ Drug Induced Liver Injury. ■ Category 1: drugs with a high risk of DILI; ■ Category 0: drugs with no risk of DILI. ■ The output value is the probability of being toxic.	LC50FM	3.163	■ 96-hour fathead minnow 50 percent lethal concentration. ■ The unit is log10[(mg/L)/(1000*MW)]
	AMES Muta genicity	0.769	●	■ AMES Toxicity ■ Category 1: Ames positive(+); ■ Category 0: Ames negative(-); ■ The output value is the probability of being toxic.	LC50DM	4.776	■ 48-hour daphnia magna 50 percent lethal concentration. ■ The unit is log10[(mg/L)/(1000*MW)]
	Rat Oral Acute Toxicity	0.365	●	■ Rat Oral Acute Toxicity. ■ Category 0: low-toxicity, > 500 mg/kg; ■ Category 1: high-toxicity; < 500 mg/kg. ■ The output value is the probability of being toxic, within the range of 0 to 1.
	FDAMDD	0.189	●	■ FDA Maximum (Recommended) Daily Dose. ■ Category 1: FDAMDD (+); ■ Category 0: FDAMDD (-); The output value is the probability of being positive.
	Skin Sensiti zation	0.911	●	■ Category 1: Sensitizer; ■ Category 0: Non-sensitizer. ■ The output value is the probability of being toxic, within the range of 0 to 1.
	Carcinogeni city	0.837	●	■ Category 1: carcinogens; ■ Category 0: non-carcinogens; ■ The output value is the probability of being toxic.
	Eye Corrosion	0.96	●	■ Eye Corrosion ■ Category 1: corrosives; Category 0: noncorrosives; ■ The output value is the probability of being corrosives.
	Eye Irritation	0.998	●	■ Eye Irritation ■ Category 1: irritants; Category 0: nonirritants; ■ The output value is the probability of being irritants.
	Respiratory	0.907	●	■ Category 1: respiratory toxicants; ■ Category 0: non-respiratory toxicants. ■ The output value is the probability of being toxic, within the range of 0 to 1.
	Human Hep atotoxicity	0.428	●	■ Human Hepatotoxicity ■ Category 1: H-HT positive(+); ■ Category 0: H-HT negative(-); ■ The output value is the probability of being toxic.
	Drug-induce d Nephrotox icity	0.363	●	■ Category 0: non-nephrotoxic (-); ■ Category 1: nephrotoxic (+). ■ The output value is the probability of being nephrotoxic (+), within the range of 0 to 1.
	Ototoxicity	0.284	●	■ Category 0: non-ototoxicity (-); ■ Category 1: ototoxicity (+). ■ The output value is the probability of being ototoxicity (+), within the range of 0 to 1.
	Hematotoxic ity	0.54	●	■ Category 0: non-hematotoxicity (-); ■ Category 1: hematotoxicity (+). ■ The output value is the probability of being hematotoxicity (+), within the range of 0 to 1.
	Genotoxicity	0.914	●	■ Category 0: non-Genotoxicity (-); ■ Category 1: Genotoxicity (+). ■ The output value is the probability of being ototoxicity (+), within the range of 0 to 1.
	RPMI-8226 Immunitoxici ty	0.051	●	■ Category 0: non-cytotoxicity (-); ■ Category 1: cytotoxicity (+). ■ The output value is the probability of being ototoxicity (+), within the range of 0 to 1.
	A549 Cytotoxicity	0.018	●	■ Category 0: non-cytotoxicity (-); ■ Category 1: cytotoxicity (+). ■ The output value is the probability of being ototoxicity (+), within the range of 0 to 1.
	Hek293 Cytotoxicity	0.138	●	■ Category 0: non-cytotoxicity (-); ■ Category 1: cytotoxicity (+). ■ The output value is the probability of being ototoxicity (+), within the range of 0 to 1.
	Drug-induce d Neurotoxi city	0.955	●	■ Category 0: non-neurotoxic (-); ■ Category 1: neurotoxic (+). ■ The output value is the probability of being neurotoxic (+), within the range of 0 to 1.
6051 P-Phenylazoaniline C1=CC=C(C=C1)N=NC2=CC=C(C=C2)N	hERG Blockers	0.069	●	■ Molecules with IC50 10M or 50% inhibition at 10 M were classified as hERG+ (Category 1), ■ while molecules with IC50 >10M or < 50% inhibition at 10M were classified as hERG - (Category 0). ■ The output value is the probability of being hERG+, within the range of 0 to 1.	Bioconcentration Factors	1.237	■ Bioconcentration factors are used for considering secondary poisoning potential and assessing risks to human health via the food chain. ■ The unit is log10[(mg/L)/(1000*MW)]
	hERG Blockers (10um)	0.649	●	■ Molecules with IC50 10 M are classified as hERG+ (Category 1), ■ and molecules with IC50 > 10M are classified as hERG- (Category 0). ■ The output value is the probability of being hERG+, within the range of 0 to 1.	IGC50	4.318	■ Tetrahymena pyriformis 50 percent growth inhibition concentration. ■ The unit is log10[(mg/L)/(1000*MW)]
	DILI	0.413	●	■ Drug Induced Liver Injury. ■ Category 1: drugs with a high risk of DILI; ■ Category 0: drugs with no risk of DILI. ■ The output value is the probability of being toxic.	LC50FM	4.864	■ 96-hour fathead minnow 50 percent lethal concentration. ■ The unit is log10[(mg/L)/(1000*MW)]
	AMES Muta genicity	0.963	●	■ AMES Toxicity ■ Category 1: Ames positive(+); ■ Category 0: Ames negative(-); ■ The output value is the probability of being toxic.	LC50DM	5.039	■ 48-hour daphnia magna 50 percent lethal concentration. ■ The unit is log10[(mg/L)/(1000*MW)]
	Rat Oral Acute Toxicity	0.43	●	■ Rat Oral Acute Toxicity. ■ Category 0: low-toxicity, > 500 mg/kg; ■ Category 1: high-toxicity; < 500 mg/kg. ■ The output value is the probability of being toxic, within the range of 0 to 1.
	FDAMDD	0.311	●	■ FDA Maximum (Recommended) Daily Dose. ■ Category 1: FDAMDD (+); ■ Category 0: FDAMDD (-); The output value is the probability of being positive.
	Skin Sensiti zation	0.884	●	■ Category 1: Sensitizer; ■ Category 0: Non-sensitizer. ■ The output value is the probability of being toxic, within the range of 0 to 1.
	Carcinogeni city	0.944	●	■ Category 1: carcinogens; ■ Category 0: non-carcinogens; ■ The output value is the probability of being toxic.
	Eye Corrosion	0.107	●	■ Eye Corrosion ■ Category 1: corrosives; Category 0: noncorrosives; ■ The output value is the probability of being corrosives.
	Eye Irritation	0.988	●	■ Eye Irritation ■ Category 1: irritants; Category 0: nonirritants; ■ The output value is the probability of being irritants.
	Respiratory	0.929	●	■ Category 1: respiratory toxicants; ■ Category 0: non-respiratory toxicants. ■ The output value is the probability of being toxic, within the range of 0 to 1.
	Human Hep atotoxicity	0.414	●	■ Human Hepatotoxicity ■ Category 1: H-HT positive(+); ■ Category 0: H-HT negative(-); ■ The output value is the probability of being toxic.
	Drug-induce d Nephrotox icity	0.531	●	■ Category 0: non-nephrotoxic (-); ■ Category 1: nephrotoxic (+). ■ The output value is the probability of being nephrotoxic (+), within the range of 0 to 1.
	Ototoxicity	0.308	●	■ Category 0: non-ototoxicity (-); ■ Category 1: ototoxicity (+). ■ The output value is the probability of being ototoxicity (+), within the range of 0 to 1.
	Hematotoxic ity	0.808	●	■ Category 0: non-hematotoxicity (-); ■ Category 1: hematotoxicity (+). ■ The output value is the probability of being hematotoxicity (+), within the range of 0 to 1.
	Genotoxicity	0.999	●	■ Category 0: non-Genotoxicity (-); ■ Category 1: Genotoxicity (+). ■ The output value is the probability of being ototoxicity (+), within the range of 0 to 1.
	RPMI-8226 Immunitoxici ty	0.026	●	■ Category 0: non-cytotoxicity (-); ■ Category 1: cytotoxicity (+). ■ The output value is the probability of being ototoxicity (+), within the range of 0 to 1.
	A549 Cytotoxicity	0.026	●	■ Category 0: non-cytotoxicity (-); ■ Category 1: cytotoxicity (+). ■ The output value is the probability of being ototoxicity (+), within the range of 0 to 1.
	Hek293 Cytotoxicity	0.562	●	■ Category 0: non-cytotoxicity (-); ■ Category 1: cytotoxicity (+). ■ The output value is the probability of being ototoxicity (+), within the range of 0 to 1.
	Drug-induce d Neurotoxi city	0.996	●	■ Category 0: non-neurotoxic (-); ■ Category 1: neurotoxic (+). ■ The output value is the probability of being neurotoxic (+), within the range of 0 to 1.
